# Supplementary material for: Tensor GSVD of Patient- and Platform-Matched Tumor and Normal DNA Copy-Number Profiles Uncovers Chromosome Arm-Wide Patterns of Tumor-Exclusive Platform-Consistent Alterations Encoding for Cell Transformation and Predicting Ovarian Cancer Survival
Source: PubMed Central journal article supplement (PMC4398562; doi:10.1371/journal.pone.0121396), 2015-04-15
Supplement: pone.0121396.s002.pdf [file pone.0121396.s002.pdf]

```
(* © Preethi Sankaranarayanan, Theodore E. Schomay, Katherine A. Aiello, and Orly Alter
2015, All Rights Reserved *)
```

```
(* Tensor GSVD of Patient- and Platform-Matched Tumor and Normal aCGH Datasets *)
```

```
(* Initialize *)
```

```
Clear["Global`*"]
SetOptions[Graphics, BaseStyle → {FontFamily → "Courier"}];
resolution = 3600;
```

```
(* Define Path to Datasets *)
```

```
path = "Desktop/OV/Data/";
```

```
(* Define the Tensor GSVD Function *)
```

```
tGSVD[tumor1_, tumor2_, normal1_, normal2_] :=
Module[{zTumorArraylets, zNormalArraylets, tumorCore, normalCore,
  xProbelets, yProbelets, tumorArraylets, normalArraylets, d1, d2,
  probelets, tumorData1, tumorData2, normalData1, normalData2}, (
  (* Compute the Mode-x Tensor GSVD *)
  {xProbelets, tumorArraylets, normalArraylets, d1, d2} =
  gsvd[Join[tumor1, tumor2], Join[normal1, normal2]];
  (* Compute the Mode-z Tensor GSVD *)
  {probelets, zTumorArraylets, zNormalArraylets, d1, d2} =
  gsvd[Join[tumor1, tumor2, 2], Join[normal1, normal2, 2]];
  (* Compute the Mode-y Tensor GSVD *)
  {yProbelets, tumorArraylets, normalArraylets, d1, d2} =
  gsvd[Transpose[Join[{Flatten[tumor1]}, {Flatten[tumor2]}]],
    Transpose[Join[{Flatten[normal1]}, {Flatten[normal2]}]]];
  (* Order the First Probelet and the Corresponding Tumor and Normal Arraylets *)
  tumorData1 = tumor1[[All, Ordering[xProbelets[[1]]]];
  tumorData2 = tumor2[[All, Ordering[xProbelets[[1]]]];
  normalData1 = normal1[[All, Ordering[xProbelets[[1]]]];
  normalData2 = normal2[[All, Ordering[xProbelets[[1]]]];
  xProbelets = xProbelets[[All, Ordering[xProbelets[[1]]]];
  yProbelets[[1]] = yProbelets[[1]] * (-1);
  (* Compute the Tensor GSVD Core *)
  {tumorCore, normalCore} = coreTensor[tumorData1, tumorData2, normalData1,
    normalData2, xProbelets, yProbelets, zTumorArraylets, zNormalArraylets];
  {tumorData1, tumorData2, normalData1, normalData2, zTumorArraylets,
    zNormalArraylets, tumorCore, normalCore, xProbelets, yProbelets}
)]
```

```

(* Define the GSVD Function *)

gsvd[tumorData_, normalData_] :=
Module[{q, q1, q2, r, u1, u2, w1, w2, vt1, vt2, d1, d2, signs, probelets,
  tumorArraylets, normalArraylets, tumorProbes, normalProbes, arrays}, (
  {tumorProbes, arrays} = Dimensions[tumorData];
  {normalProbes, arrays} = Dimensions[normalData];
  (* Compute the QR Decomposition of the Appended Tumor and Normal Datasets *)
  {q, r} = QRDecomposition[Join[tumorData, normalData]];
  q = Transpose[q];
  (* Compute the SVD of the Tumor Block of Q *)
  q1 = q[[1 ;; tumorProbes]];
  {u1, w1, vt1} = SingularValueDecomposition[q1, arrays];
  vt1 = Transpose[vt1].r;
  d1 = DiagonalMatrix[Diagonal[Sqrt[vt1.Transpose[vt1]]]];
  Do[vt1[[a]] = vt1[[a]] / d1[[a, a]], {a, 1, arrays}];
  d1 = w1.d1;
  probelets = vt1;
  tumorArraylets = u1;
  (* Compute the SVD of the Normal Block of Q *)
  q2 = q[[tumorProbes + 1 ;; normalProbes + tumorProbes]];
  {u2, w2, vt2} = SingularValueDecomposition[q2, arrays];
  vt2 = Transpose[vt2].r;
  d2 = DiagonalMatrix[Diagonal[Sqrt[vt2.Transpose[vt2]]]];
  Do[vt2[[a]] = vt2[[a]] / d2[[a, a]], {a, 1, arrays}];
  (* Order the SVD of the Normal Block of Q by Ascending Singular Values *)
  vt2 = Transpose[Take[
    Transpose[Sort[
      Transpose[
        Join[{Diagonal[w2]}, Transpose[vt2]]
      ]][[2 ;; arrays + 1]]];
    d2 = DiagonalMatrix[
      Sort[Diagonal[w2]] *
      Transpose[Sort[
        Transpose[
          Join[{Diagonal[w2]}, {Diagonal[d2]}]
        ]][[2]]];
    normalArraylets =
      Take[Transpose[
        Sort[Transpose[
          Join[{Diagonal[w2]}, u2]
        ]][[2 ;; normalProbes + 1]]];
    signs = DiagonalMatrix[Diagonal[vt2.Transpose[vt1]]];
    vt2 = signs.vt2;
    normalArraylets = normalArraylets.signs;
    {probelets, tumorArraylets, normalArraylets, d1, d2}
  ])]

```

```

(* Define the Core Tensor Function *)

coreTensor[tumor1_, tumor2_, normal1_, normal2_,
  xProbelets_, yProbelets_, zTumorArraylets_, zNormalArraylets_] :=
Module[{tumorCore, normalCore}, (
  tumorCore = Transpose[
    {Dot[tumor1, Inverse[xProbelets]], Dot[tumor2, Inverse[xProbelets]]}, {3, 1, 2}];
  normalCore = Transpose[{Dot[normal1, Inverse[xProbelets]],
    Dot[normal2, Inverse[xProbelets]]}, {3, 1, 2}];
  tumorCore = Dot[Transpose[zTumorArraylets], tumorCore];
  normalCore = Dot[Transpose[zNormalArraylets], normalCore];
  tumorCore = Dot[tumorCore, Inverse[yProbelets]];
  normalCore = Dot[normalCore, Inverse[yProbelets]];
  {tumorCore, normalCore}
)]

(* Define the Arraylet Standardization *)

centeredArraylet[arraylet_] :=
Module[{arrayletMedian, medianAbsoluteDeviations, arrayletCentered},
  (arrayletMedian = Median[arraylet];
  medianAbsoluteDeviations = 1.4826 * MedianDeviation[arraylet];
  arrayletCentered = (arraylet - arrayletMedian) / medianAbsoluteDeviations;
  {arrayletCentered, arrayletMedian, medianAbsoluteDeviations}
)]

(* Define the Chromosome Band Coordinates *)

arrayletVariables[armBandCoordinates_, arm_] :=
Module[{armBands, xcoordinates, list, bands, indices, num, subLists, minVal, maxVal}, (
  armBands = armBandCoordinates;
  armBands[[2 ;;, 2]] = armBands[[2 ;;, 2]] + 1;
  armBands[[2 ;;, 3]] = armBands[[2 ;;, 3]] + 1;
  xcoordinates = Range[Length[arm]];
  list = Transpose[Join[{xcoordinates}, {arm[[All, -1]]}]];
  bands = Range[Length[armBands]];
  indices = Flatten[Map[(num = #;
    Position[arm[[All, 2]], _? (# ≤ armBands[[num, 3]] &)] [[-1]]) &,
    Range[2, Length[armBands]]]];
  indices = DeleteDuplicates[indices];
  subLists =
  Map[If[# ≠ 1, list[[indices[[# - 1]] + 1 ;; indices[[#]]], list[[1 ;; indices[[#]]]]] &,
    Range[Length[indices]]];
  minVal = Round[Min[arm[[All, -1]]]];
  maxVal = Ceiling[Max[arm[[All, -1]]]];
  {subLists, minVal, maxVal, indices}
)]

```

```
(* Define the Segments *)
```

```
armSegments[arm_, arrayletMedian_, medianAbsoluteDeviations_] :=  
Module[{armsegments, segmentMean, scaledSegmentMean},  
(armsegments = Import[path <> "Tumor_Arraylets_1.txt", "Table"];  
If[arm ≠ "6p+12p", armsegments = armsegments[[Position[armsegments[[All, 2]], arm][[1]][[1]]];  
Position[armsegments[[All, 2]], arm][[-1]][[1]]];;  
armsegments = Join[armsegments[[Position[armsegments[[All, 2]], 6][[1]][[1]]];  
Position[armsegments[[All, 2]], 6][[-1]][[1]]];;  
armsegments[[Position[armsegments[[All, 2]], 12][[1]][[1]]];;  
Position[armsegments[[All, 2]], 12][[-1]][[1]]];];;  
segmentMean = armsegments[[All, 10]];  
scaledSegmentMean = (segmentMean - arrayletMedian) / medianAbsoluteDeviations;  
armsegments[[All, 10]] = scaledSegmentMean;  
armsegments[[All, 8]] = armsegments[[All, 10]];  
armsegments  
)]
```

```
(* Define the Arraylet Plot *)
```

```
arrayletPlotDisplay[arm_, subLists_, xticks_, minVal_, maxVal_, indices_, segments_,  
genes_, armName_, letter_, colorDefinitions_, probes_ : 0] := Module[{bandarraylet}, (  
bandarraylet = Show[ListPlot[subLists, AspectRatio → 0.15, FrameLabel → {None,  
Framed[Column[{Style["Relative DNA", FontFamily → "Courier", FontSize → labelsize],  
Style["Copy Number", FontFamily → "Courier", FontSize → labelsize]}, Center],  
FrameStyle → None, FrameMargins → {{0, 0}, {2, 0}}]],  
AxesStyle → {Directive[Dashed, AbsoluteThickness[1.5]], Directive[Black]},  
Frame → True, FrameStyle → Directive[AbsoluteThickness[1.5]], FrameTicks →  
{}, {{minVal, Style[ToString[minVal], FontFamily → "Courier", FontSize → ticksize],  
{0, 0.005}}, {0, Style[ToString[0], FontFamily → "Courier", FontSize → ticksize],  
{0, 0.005}}, {maxVal, Style[ToString[maxVal], FontFamily → "Courier",  
FontSize → ticksize], {0, 0.005}}}], xticks, {}},  
PlotRange → {{1, Length[arm]}, {Round[minVal, 10-2], maxVal}},  
PlotRangePadding → None, PlotStyle →  
Map[{colorDefinitions[#[1]], PointSize[0.002]} &, Range[Length[indices]]], PlotLabel →  
Framed[Style[Column[{Style[" " <> armName, FontSize → 16, FontFamily → "Courier"],  
letter <> "Tumor Arraylet"}, Spacings → 0.5], FontFamily → "Courier",  
FontSize → labelsize], FrameStyle → None, FrameMargins → {{0, 0}, {4, 0}}]],  
Graphics[{Black, Thickness[0.001], Map[Line[{{#[1], #[3]}, {#[2], #[3]}}] &  
segments[[All, 6 ;; 8]]}], If[armName == "6p+12p", Graphics[  
{Black, Dashed, Line[{{probes + 1, N[Round[minVal, 10-2]}, {probes + 1, maxVal}]}],  
Directive[AbsoluteThickness[1.5]]], {}], Graphics[{Arrowheads[0.006],  
Map[Arrow[{{#[3], #[4]}, {#[1], #[2]}}] &, genes[[2 ;;]]}],  
Graphics[Map[Style[Text[#[6], {#[3] + #[8], #[4] + #[5]}], Symbol[#[7]],  
FontFamily → "courier", FontSize → labelsize] &, genes[[2 ;;]]],  
ImageSize → {1014, 204}, ImagePadding → {{76, 50}, {5, 20}}];  
bandarraylet  
)]
```

```
(* Define the Tick Marks in the Arraylet Plot *)
```

```
xTicks[indices_] := Module[{xticks}, (  
xticks = Join[{{1, Style[Framed[ToString[1], FrameStyle → None,  
FrameMargins → {{Automatic, Automatic}, {0, 0.25}}], FontFamily → "Courier",  
FontSize → ticksize], {0, 0.005}}],  
Map[{indices[#[1]], Style[Framed[ToString[#[1]], FrameStyle → None,  
FrameMargins → {{Automatic, Automatic}, {0, 2}}], FontFamily → "Courier",  
FontSize → ticksize], {0, 0.005}}] &, Range[2, Length[indices]]];;  
xticks  
)]
```

```

(* Define the Tick Marks in the Tumor Raster *)

xTicksRaster[indices_, armBands_] := Module[{tickPosition, xticks}, (tickPosition =
  Map[If[# ≠ 1, Floor[(indices[[# - 1]] + 1) / step], 0] &, Range[Length[indices]]];
  xticks = Transpose[Join[{tickPosition}, {Map[Style[Framed[ToString[#], FrameStyle → None,
    FrameMargins → {{Automatic, Automatic}, {0, -1}}, FontFamily → "Courier",
    FontSize → ticksize] &, Range[Length[armBands] - 1]}],
    {Table[{0, 0.005}, {Length[armBands] - 1}]}]];
  xticks
)]

(* Define the Tumor Raster *)

tumorRaster[tumor1_, tumor2_] :=
Module[{tumorData, tumorProbes, binnedTumorData, binnedRows, arrays, raster,
  adjustedValue, binnedRows}, (tumorData = Median[Join[{tumor1}, {tumor2}]];
  tumorProbes = Dimensions[tumor1][[1]];
  binnedTumorData =
  Table[Mean[tumorData[[a ;; a + step - 1]]], {a, 1, Floor[tumorProbes, step], step}];
  {binnedRows, arrays} = Dimensions[binnedTumorData];
  raster = Table[adjustedValue = binnedTumorData[[a, b]];
    If[adjustedValue > 0, {adjustedValue, 0, 0}, {0, adjustedValue, 0}],
    {a, 1, binnedRows}, {b, 1, arrays}];
  raster[[All, All, 2]] = -raster[[All, All, 2]];
  raster = Transpose[raster * rastercontrast];
  raster
)]

(* Define the Raster Display *)

rasterPlotDisplay[sortedRaster_, xticks_, letter_] := Module[{rasterFig}, (
  rasterFig = Graphics[Raster[sortedRaster, ColorFunction → RGBColor],
    ImageSize → {940, 320}, FrameLabel → {Framed[
      Column[{Style["Cytogenetic Bands", FontFamily → "Courier", FontSize → labelsize,
        FontTracking → "Plain"], Style[letter <> "Tumor Relative DNA Copy Number",
        FontFamily → "Courier", FontSize → labelsize, FontTracking → "Plain"]}], Center],
      FrameStyle → None, FrameMargins → {{0, 0}, {0, -5}}, None, None,
      Framed[Style["Patients", FontFamily → "Courier", FontSize → labelsize],
        FrameStyle → None, FrameMargins → {{0, 0}, {0, 1}}]},
    PlotRangePadding → None, ImagePadding → {{2, 49.5}, {52.5, 0}},
    AspectRatio → 0.3, Frame → True,
    FrameStyle → Directive[AbsoluteThickness[1.5]],
    FrameTicks → {xticks, None, None,
      Map[{#, Style[ToString[#], FontFamily → "Courier", FontSize → ticksize], {0, 0.005}] &,
        {1, 50, 100, 150, 200}]}];
  rasterFig
)]

```

```
(* Define the Probelet Coefficient Classes and the Probelet Cutoff *)
```

```
probeletVariables[probelet_, probeletcutoff_] :=
Module[{probeletCentered, scaledProbeletCutoff, indx, lowGroup, highGroup, minVal, maxVal},
(probeletCentered = (probelet - Median[probelet]) / (MedianDeviation[probelet] * 1.4826);
scaledProbeletCutoff = (probeletcutoff - Median[probelet]) /
(MedianDeviation[probelet] * 1.4826);
indx = Position[probeletCentered, _? (# ≤ scaledProbeletCutoff &)] [[-1]] [[1]];
lowGroup = Transpose[Join[{probeletCentered[[1 ;; indx]]}, {Range[indx]}]];
highGroup = Transpose[
Join[{probeletCentered[[indx + 1 ;; ]}], {Range[indx + 1, Length[probeletCentered]]}]];
minVal = Min[probeletCentered];
maxVal = Max[probeletCentered];
{lowGroup, highGroup, minVal, maxVal, scaledProbeletCutoff}
)]
```

```
(* Define the Probelet Plot *)
```

```
probeletPlotDisplay[lowGroup_, highGroup_, xticks_, probeletCutoff_, letter_, armName_: "" ] :=
Module[{probeletFig}, (
probeletFig = Show[ListPlot[{lowGroup, highGroup},
Frame → True, FrameStyle → Directive[AbsoluteThickness[1.5]],
FrameLabel → {Framed[Column[{Style["Relative DNA Copy Number in",
FontSize → labelsize, FontTracking → "Plain"],
Style["Median Absolute Deviations", FontFamily → "Courier",
FontSize → labelsize, FontTracking → "Plain"]}, Center],
FrameStyle → None, FrameMargins → {{0, 0}, {0, -3}},
Framed[Style[letter <> "Probelet", FontFamily → "Courier", FontSize → labelsize],
FrameStyle → None, FrameMargins → {{0, 0}, {1, 0}}, None, None, None],
AspectRatio → 1.02, PlotStyle → {{If[armName ≠ "6p+12p", Blue, Red], PointSize[0.02]},
{If[armName ≠ "6p+12p", Red, Blue], PointSize[0.02]}}, FrameTicks → {xticks,
{{1, Style[ToString[1], FontFamily → "Courier", FontSize → ticksize], {0, 0.02}},
{50, Style[ToString[50], FontFamily → "Courier", FontSize → ticksize], {0, 0.02}},
{100, Style[ToString[100], FontFamily → "Courier", FontSize → ticksize], {0, 0.02}},
{150, Style[ToString[150], FontFamily → "Courier", FontSize → ticksize], {0, 0.02}},
{200, Style[ToString[200], FontFamily → "Courier", FontSize → ticksize], {0, 0.02}}},
None, None}, AxesOrigin → {1, 0}, Axes → False,
ImageSize → {316, 323}, ImagePadding → {{50, 0}, {54.5, 2}},
PlotRange → {{Automatic, Automatic}, {1, 250}},
Graphics[{Dashed, AbsoluteThickness[1.5], Black,
Line[{{probeletCutoff, 1}, {probeletCutoff, 249}}]}];
probeletFig
)]
```

```
(* Define the Generalized Fractions *)
```

```
generalizedFractions[tumorCore_, normalCore_] := Module[{tumorFractions,  
  normalFractions, totaltumorFractions, totalnormalFractions, entropy1, entropy2}, (  
tumorFractions = tumorCore^2;  
totaltumorFractions = Total[Flatten[tumorFractions]];  
tumorFractions = tumorFractions / totaltumorFractions;  
normalFractions = normalCore^2;  
totalnormalFractions = Total[Flatten[normalFractions]];  
normalFractions = normalFractions / totalnormalFractions;  
  entropy1 = -N[Sum[tumorFractions[[p, q, r]] * Log[tumorFractions[[p, q, r]]],  
    {p, 1, 498}, {q, 1, 249}, {r, 1, 2}] / Log[498 * 249 * 2];  
entropy1 = Round[entropy1, 0.01];  
  entropy2 = -N[Sum[normalFractions[[p, q, r]] * Log[normalFractions[[p, q, r]]],  
    {p, 1, 498}, {q, 1, 249}, {r, 1, 2}] / Log[498 * 249 * 2];  
entropy2 = Round[entropy2, 0.01];  
  {tumorFractions, normalFractions, entropy1, entropy2}  
)]
```

```
(* Define the Fractions Display *)
```

```
barChartDisplay[fractions_, labelx_, labely_, xgrid_, xframe_, plotrange_] :=  
Module[{pos, vals, arrayNum, ylabels, barChart, framey, gridx, framex}, (  
  gridx = xgrid;  
  framex = xframe;  
  pos = Map[Position[fractions, RankedMax[Flatten[fractions], #]] &, Range[1, 10]];  
  pos = Flatten[pos];  
  pos = Map[ToString[pos[[#]]] &, Range[Length[pos]]];  
  pos = Map[StringJoin[Riffle[#, ", "] &, Partition[pos, 3]];  
  vals = Map[RankedMax[Flatten[fractions], #] &, Range[1, 10]];  
  arrayNum = 10;  
  ylabels = Range[arrayNum];  
  framex = Table[{gridx[[a]], Style[Rotate[framex[[a]], Pi / 2]}], {a, 1, 6}};  
  framey = Map[{11 - #, pos[[#]]} &, Reverse[Range[Length[pos]]]];  
  framey = ReplaceAll[framey, "1,1,1" -> " 1,1,1"];  
  gridx = Table[{gridx[[a]], RGBColor[0, 0, 0]}], {a, 1, 6}};  
  barChart = Show[BarChart[Reverse[vals], BarOrigin -> Left, ChartStyle -> Red,  
    ChartBaseStyle -> EdgeForm[Thin], AspectRatio -> 1, Ticks -> None, Axes -> None,  
    ImageSize -> 250], PlotRange -> {plotrange, {0.5, arrayNum + 0.5}}, Frame -> True,  
    FrameTicks -> {None, framey, framex, None}, FrameLabel -> {None, labely, labelx, ""},  
    GridLines -> {Drop[Drop[gridx, {6}], {1}], None},  
    BaseStyle -> {FontFamily -> "Courier", FontSize -> 10}};  
  barChart  
)]
```

```
(* Compute the 6p+12p Tensor GSVD *)
```

```
(* Read the 6p+12p Datasets *)
```

```
tumor1 = Import[path <> "D_Tumor_1_6p+12p.txt", "Table"];  
tumor2 = Import[path <> "D_Tumor_2_6p+12p.txt", "Table"];  
normal1 = Import[path <> "D_Normal_1_6p+12p.txt", "Table"];  
normal2 = Import[path <> "D_Normal_2_6p+12p.txt", "Table"];  
ArrayNames = tumor1[[1, 5 ;;]];  
tumorProbeID = tumor1[[2 ;;, 1]];  
tumorProbeLoc = tumor1[[2 ;;, 2 ;; 4]];  
normalProbeID = normal1[[2 ;;, 1]];  
normalProbeLoc = normal1[[2 ;;, 2 ;; 4]];  
tumor1 = Drop[tumor1, 1, 4];  
tumor2 = Drop[tumor2, 1, 4];  
normal1 = Drop[normal1, 1, 4];  
normal2 = Drop[normal2, 1, 4];
```

```
(* Compute the 6p+12p Tensor GSVD *)
```

```
{tumor1, tumor2, normal1, normal2, zTumorArraylets, zNormalArraylets, tumorCore,  
normalCore, xProbelets, yProbelets} = tGSVD[tumor1, tumor2, normal1, normal2];
```

```
labelsize = 14;  
ticksize = 10;  
colorDefinitions = Chop[Drop[Flatten[Table[{ColorConvert[Hue[a / 24], RGBColor],  
ColorConvert[Hue[(a + 12) / 24], RGBColor]}, {a, 10, -1, -1}]], {24}]];  
colorDefinitions = Join[colorDefinitions, colorDefinitions];
```

```
(* Create the 6p+12p Generalized Fractions Display *)
```

```
{tumorFractions, normalFractions, entropy1, entropy2} =  
generalizedFractions[tumorCore, normalCore];  
labelx = Column[{"Tumor Generalized Fraction",  
"(a)  $\frac{1}{d} \sum_{i=1}^d \frac{1}{d}$ " <> ToString[entropy1], Center, 0.75];  
labely = ColumnForm[{"6p+12p", "Subtensors"}, Center];  
gridx = {0, 0.05, 0.1, 0.15, 0.2, 0.25};  
framex = {"0", "0.05", "0.1", "0.15", "0.2", "0.25"};  
plotrangex = {0.0052, 0.25};  
sixp12pTumorBarChart =  
barChartDisplay[tumorFractions, labelx, labely, gridx, framex, plotrangex];  
labelx = Column[{"Normal Generalized Fraction",  
"(b)  $\frac{1}{d} \sum_{i=1}^d \frac{1}{2}$ " <> ToString[entropy2], Center, 0.75];  
labely = " ";  
gridx = {0, 0.02, 0.04, 0.06, 0.08, 0.1};  
framex = {"0", "0.02", "0.04", "0.06", "0.08", "0.1"};  
plotrangex = {0.0021, 0.1};  
sixp12pNormalBarChart =  
barChartDisplay[normalFractions, labelx, labely, gridx, framex, plotrangex];
```



(\* Input the 6p+12p Chromosome Band Coordinates \*)

```
{arrayletCentered, arrayletMedian, medianAbsoluteDeviations} =
  centeredArraylet[zTumorArraylets[[All, 1]]];
arm = Transpose[Join[Transpose[tumorProbeLoc], {arrayletCentered}]];
probes = Position[arm[[All, 1]], 6][[-1]][[1]];
arm = arm[[1 ;; probes]];
armBands = {{{"#chrom", "chromStart", "chromEnd", "name"}, {"chr6", 0, 2 300 000, "p25.3"},
  {"chr6", 2 300 000, 4 200 000, "p25.2"}, {"chr6", 4 200 000, 7 100 000, "p25.1"},
  {"chr6", 7 100 000, 10 600 000, "p24.3"}, {"chr6", 10 600 000, 11 600 000, "p24.2"},
  {"chr6", 11 600 000, 13 400 000, "p24.1"}, {"chr6", 13 400 000, 15 200 000, "p23"},
  {"chr6", 15 200 000, 25 200 000, "p22.3"}, {"chr6", 25 200 000, 27 000 000, "p22.2"},
  {"chr6", 27 000 000, 30 400 000, "p22.1"}, {"chr6", 30 400 000, 32 100 000, "p21.33"},
  {"chr6", 32 100 000, 33 500 000, "p21.32"}, {"chr6", 33 500 000, 36 600 000, "p21.31"},
  {"chr6", 36 600 000, 40 500 000, "p21.2"}, {"chr6", 40 500 000, 46 200 000, "p21.1"},
  {"chr6", 46 200 000, 51 800 000, "p12.3"}, {"chr6", 51 800 000, 52 900 000, "p12.2"},
  {"chr6", 52 900 000, 57 000 000, "p12.1"}, {"chr6", 57 000 000, 58 700 000, "p11.2"},
  {"chr12", 0, 3 300 000, "p13.33"}, {"chr12", 3 300 000, 5 400 000, "p13.32"},
  {"chr12", 5 400 000, 10 100 000, "p13.31"}, {"chr12", 10 100 000, 12 800 000, "p13.2"},
  {"chr12", 12 800 000, 14 800 000, "p13.1"}, {"chr12", 14 800 000, 20 000 000, "p12.3"},
  {"chr12", 20 000 000, 21 300 000, "p12.2"}, {"chr12", 21 300 000, 26 500 000, "p12.1"},
  {"chr12", 26 500 000, 27 800 000, "p11.23"}, {"chr12", 27 800 000, 30 700 000, "p11.22"},
  {"chr12", 30 700 000, 33 300 000, "p11.21"}, {"chr12", 33 300 000, 35 800 000, "p11.1"}}};
{subLists, minVal, maxVal, indices} = arrayletVariables[armBands[[1 ;; 20]], arm];
arm = Transpose[Join[Transpose[tumorProbeLoc], {arrayletCentered}]];
arm = arm[[Position[arm[[All, 1]], 12][[1]][[1]] ;;]];
{subLists1, minVal, maxVal, indices1} =
  arrayletVariables[Join[{armBands[[1]]}, armBands[[21 ;;]]], arm];
Map[(subLists1[[#]][[All, 1]] = subLists1[[#]][[All, 1]] + probes) &,
  Range[Length[subLists1]]];
subLists = Join[subLists, subLists1];
indices1 = indices1 + probes;
indices = Join[indices, indices1];
arm = Transpose[Join[Transpose[tumorProbeLoc], {arrayletCentered}]];
minVal = Round[Min[arm[[All, -1]]] - 3];
maxVal = Round[Max[arm[[All, -1]]]];
```

(\* Input the 6p+12p Segments' and Genes' Coordinates \*)

```
segments = armSegments["6p+12p", arrayletMedian, medianAbsoluteDeviations];
genes = {{{"xcoord", "ycoord", "xcoord1", "ycoord1", "Displacement", "gene-name", "color",
  "xDisplacement"}, {3986.5, -0.0043, 3986.5, -0.01, -0.0015, "MIR877", "Blue", 0},
  {4137, -0.0043, 4137, 0.008, 0.0012, "TNF", "Red", 0},
  {4904, -0.0043, 4904, 0.008, 0.0012, "MAPK14", "Red", 0},
  {5023.5, -0.0043, 5023.5, -0.01, -0.0015, "CDKN1A", "Red", 0},
  {8216.5, -0.0003, 8476.5, -0.0003, 0, "PRIM2", "Black", 350},
  {9097.5, 0.0118, 9097.5, 0.019, 0.0012, "RAD51AP1", "Red", 0},
  {9521.2, 0.0118, 9521.2, -0.01, -0.0015, "MIR200C/141", "Blue", 0},
  {12 074.5, 0.0216, 12 614.5, 0.0216, 0, "KRAS", "Black", 300},
  {10 320.5, 0.0105, 10 320.5, 0.0025, -0.0015, "CDKN1B", "Red", 0},
  {11 777, 0.0188, 11 377, 0.0188, 0, "SOX5", "Red", -300},
  {12 268.5, 0.0175, 12 268.5, 0.003, -0.002, "ITPR2", "Red", 0},
  {12 345, 0.016, 12 645, 0.016, 0, "ASUN", "Red", 280}}};
genes[[2 ;;, 2]] = (genes[[2 ;;, 2]] - arrayletMedian) / medianAbsoluteDeviations;
genes[[2 ;;, 4]] = (genes[[2 ;;, 4]] - arrayletMedian) / medianAbsoluteDeviations;
scaledDisplacement = genes[[2 ;;, 5]] * 500;
genes[[2 ;;, 5]] = scaledDisplacement;
```

```
(* Create the 6p+12p Arraylet Plot Display *)
```

```
xticks = Join[{{1, Style[Framed[ToString[1], FrameStyle → None,  
  FrameMargins → {{Automatic, Automatic}, {0, 0.25}}],  
  FontFamily → "Courier", FontSize → ticksize], {0, 0.005}}},  
  Map[{{indices[[# - 1]}, Style[Framed[ToString[#], FrameStyle → None,  
    FrameMargins → {{Automatic, Automatic}, {0, 2}}],  
    FontFamily → "Courier", FontSize → ticksize], {0, 0.005}} &, Range[2, 19]],  
  {{probes + 1, Style[Framed[ToString[1], FrameStyle → None,  
    FrameMargins → {{Automatic, Automatic}, {0, 0.25}}],  
    FontFamily → "Courier", FontSize → ticksize], {0, 0.005}}},  
  Map[{{indices1[[# - 1]}, Style[Framed[ToString[#], FrameStyle → None,  
    FrameMargins → {{Automatic, Automatic}, {0, 2}}], FontFamily → "Courier",  
    FontSize → ticksize], {0, 0.005}} &, Range[2, Length[indices1]]];  
xticks[[17]][[2]] = Style[Framed["17 ", FrameStyle → None,  
  FrameMargins → {{Automatic, Automatic}, {0, 2}}],  
  FontFamily → "Courier", FontSize → ticksize];  
xticks[[18]][[2]] =  
  Style[Framed[" 18", FrameStyle → None, FrameMargins → {{Automatic, Automatic}, {0, 2}}],  
  FontFamily → "Courier", FontSize → ticksize];  
xticks[[19]][[2]] =  
  Style[Framed["19 ", FrameStyle → None, FrameMargins → {{Automatic, Automatic}, {0, 2}}],  
  FontFamily → "Courier", FontSize → ticksize];  
xticks[[20]][[2]] =  
  Style[Framed[" 1", FrameStyle → None, FrameMargins → {{Automatic, Automatic}, {0, 2}}],  
  FontFamily → "Courier", FontSize → ticksize];  
gArraylet = arrayletPlotDisplay[arm, subLists, xticks, minVal, maxVal,  
  indices, segments, genes, "6p+12p", "(a)", colorDefinitions, probes];
```

```
(* Create the 6p+12p Tumor Datasets Raster Display *)
```

```
step = 5;  
rastercontrast = 1;  
sortedRaster = tumorRaster[tumor1, tumor2];  
  
xticks = xTicksRaster[indices, armBands];  
xticks[[17]][[2]] =  
  Style[Framed["17 ", FrameStyle → None, FrameMargins → {{Automatic, Automatic}, {0, -1}}],  
  FontFamily → "Courier", FontSize → ticksize];  
xticks[[18]][[2]] =  
  Style[Framed[" 18", FrameStyle → None, FrameMargins → {{Automatic, Automatic}, {0, -1}}],  
  FontFamily → "Courier", FontSize → ticksize];  
xticks[[19]][[2]] =  
  Style[Framed["19 ", FrameStyle → None, FrameMargins → {{Automatic, Automatic}, {0, -1}}],  
  FontFamily → "Courier", FontSize → ticksize];  
xticks[[20]][[2]] =  
  Style[Framed[" 1", FrameStyle → None, FrameMargins → {{Automatic, Automatic}, {0, -1}}],  
  FontFamily → "Courier", FontSize → ticksize];  
Map[(xticks[[#]][[2]] = Style[Framed[ToString[# - 19], FrameStyle → None,  
  FrameMargins → {{Automatic, Automatic}, {0, -1}}],  
  FontFamily → "Courier", FontSize → ticksize];) &, Range[21, 31]];  
  
gRaster = rasterPlotDisplay[sortedRaster, xticks, "(c) "];
```

```
(* Classify the Patients into High and Low 6p+12p Probelet Coefficients *)
```

```
probeletCutoff = 0.050337629778934495;  
{lowGroup, highGroup, minVal, maxVal, probeletCutoff} =  
  probeletVariables[xProbelets[[1]], probeletCutoff];  
  
xticks = {{-8.5, Style[Framed["-8.5", FrameStyle → None, FrameMargins → {{0, 0}, {0, -4.5}}],  
  FontFamily → "Courier", FontSize → ticksize], {0, 0.02}},  
{-6.5, Style[Framed["-6.5", FrameStyle → None, FrameMargins → {{0, 0}, {0, -4.5}}],  
  FontFamily → "Courier", FontSize → ticksize], {0, 0.02}},  
{-1.5, Style[Framed["-1.5", FrameStyle → None, FrameMargins → {{0, 0}, {0, -4.5}}],  
  FontFamily → "Courier", FontSize → ticksize], {0, 0.02}},  
{-1, Style[Framed["-1", FrameStyle → None, FrameMargins → {{0, 0}, {0, -4.5}}],  
  FontFamily → "Courier", FontSize → ticksize], {0, 0.02}},  
{-0.5, Style[Framed["-0.5", FrameStyle → None, FrameMargins → {{0, 0}, {0, -4.5}}],  
  FontFamily → "Courier", FontSize → ticksize, FontTracking → "Narrow"], {0, 0.02}},  
{probeletCutoff, Style[Framed[" " <> ToString[N[Round[probeletCutoff, 10^-1]]],  
  FrameStyle → None, FrameMargins → {{0, 0}, {0, -4.5}}], FontFamily → "Courier",  
  FontSize → ticksize, FontTracking → "Narrow"], {0, 0.02}}, {2.5, Style[Framed[  
  ToString[2.5], FrameStyle → None, FrameMargins → {{Automatic, Automatic}, {0, -4.5}}],  
  FontFamily → "Courier", FontSize → ticksize], {0, 0.02}},  
{2, Style[Framed["2", FrameStyle → None, FrameMargins → {{0, 0}, {0, -4.5}}],  
  FontFamily → "Courier", FontSize → ticksize], {0, 0.02}},  
{1.5, Style[Framed["1.5", FrameStyle → None, FrameMargins → {{0, 0}, {0, -4.5}}],  
  FontFamily → "Courier", FontSize → ticksize], {0, 0.02}},  
{0, Style[Framed["0", FrameStyle → None, FrameMargins → {{0, 0}, {0, -4.5}}],  
  FontFamily → "Courier", FontSize → ticksize], {0, 0.02}},  
{3, Style[Framed["3", FrameStyle → None, FrameMargins → {{0, 0}, {0, -4.5}}],  
  FontFamily → "Courier", FontSize → ticksize], {0, 0.02}},  
{1, Style[Framed["1", FrameStyle → None, FrameMargins → {{0, 0}, {0, -4.5}}],  
  FontFamily → "Courier", FontSize → ticksize], {0, 0.02}}};
```

```
(* Create the 6p+12p Probelet Display *)
```

```
gProbelet = probeletPlotDisplay[lowGroup, highGroup, xticks, probeletCutoff, "(b)", "6p+12p"];
```

```
(* Combine the 6p+12p Probelet, Tumor Arraylet, and Tumor Datasets Displays *)
```

```
figure1 = Grid[{{gArraylet, SpanFromLeft}, {gProbelet, gRaster}},  
  Alignment → {{Right}, {Left, Right}}, Spacings → {2 → 0.2, 2 → 0}];
```

```
(* Compute the 7p Tensor GSVD *)
```

```
(* Read the 7p Datasets *)
```

```
tumor1 = Import[path <> "D_Tumor_1_7p.txt", "Table"];
tumor2 = Import[path <> "D_Tumor_2_7p.txt", "Table"];
normal1 = Import[path <> "D_Normal_1_7p.txt", "Table"];
normal2 = Import[path <> "D_Normal_2_7p.txt", "Table"];
ArrayNames = tumor1[[1, 5 ;;]];
tumorProbeID = tumor1[[2 ;;, 1]];
tumorProbeLoc = tumor1[[2 ;;, 2 ;; 4]];
normalProbeID = normal1[[2 ;;, 1]];
normalProbeLoc = normal1[[2 ;;, 2 ;; 4]];
tumor1 = Drop[tumor1, 1, 4];
tumor2 = Drop[tumor2, 1, 4];
normal1 = Drop[normal1, 1, 4];
normal2 = Drop[normal2, 1, 4];
```

```
(* Compute the 7p Tensor GSVD *)
```

```
{tumor1, tumor2, normal1, normal2, zTumorArraylets, zNormalArraylets, tumorCore,
  normalCore, xProbelets, yProbelets} = tGSVD[tumor1, tumor2, normal1, normal2];
```

```
labelsize = 14;
ticksize = 10;
colorDefinitions = Chop[Drop[Flatten[Table[{ColorConvert[Hue[a / 24], RGBColor],
  ColorConvert[Hue[(a + 12) / 24], RGBColor]}, {a, 10, -1, -1}]], {24}]];
colorDefinitions = Join[colorDefinitions, colorDefinitions];
```

```
(* Create the 7p Generalized Fractions Display *)
```

```
{tumorFractions, normalFractions, entropy1, entropy2} =
  generalizedFractions[tumorCore, normalCore];
gridx = {0, 0.02, 0.04, 0.06, 0.08, 0.1};
framex = {"0", "0.02", "0.04", "0.06", "0.08", "0.1"};
plotrange = {0.0021, 0.1};
labelx =
  ColumnForm[{"(c) \!\(\*SubscriptBox[\(d\), \{1\}]\) = " <> ToString[entropy1], Center];
labeledy = ColumnForm[{"7p", "Subtensors"}, Center];
sevenpTumorBarChart =
  barChartDisplay[tumorFractions, labelx, labeledy, gridx, framex, plotrange];
gridx = {0.0001, 0.01, 0.02, 0.03, 0.04, 0.05};
framex = {"0", "0.01", "0.02", "0.03", "0.04", "0.05"};
labelx =
  ColumnForm[{"(d) \!\(\*SubscriptBox[\(d\), \{2\}]\) = " <> ToString[entropy2], Center];
labeledy = " ";
plotrange = {0.00112, 0.05};
sevenpNormalBarChart =
  barChartDisplay[normalFractions, labelx, labeledy, gridx, framex, plotrange];
```

```

(* Input the 7p Chromosome Band Coordinates *)

{arrayletCentered, arrayletMedian, medianAbsoluteDeviations} =
  centeredArraylet[zTumorArraylets[[All, 1]]];
arm = Transpose[Join[Transpose[tumorProbeLoc], {arrayletCentered}]];
armBands = {{"#chrom", "chromStart", "chromEnd", "name"}, {"chr7", 0, 2 800 000, "p22.3"},
  {"chr7", 2 800 000, 4 500 000, "p22.2"}, {"chr7", 4 500 000, 7 300 000, "p22.1"},
  {"chr7", 7 300 000, 13 800 000, "p21.3"}, {"chr7", 13 800 000, 16 500 000, "p21.2"},
  {"chr7", 16 500 000, 20 900 000, "p21.1"}, {"chr7", 20 900 000, 25 500 000, "p15.3"},
  {"chr7", 25 500 000, 28 000 000, "p15.2"}, {"chr7", 28 000 000, 28 800 000, "p15.1"},
  {"chr7", 28 800 000, 35 000 000, "p14.3"}, {"chr7", 35 000 000, 37 200 000, "p14.2"},
  {"chr7", 37 200 000, 43 300 000, "p14.1"}, {"chr7", 43 300 000, 45 400 000, "p13"},
  {"chr7", 45 400 000, 49 000 000, "p12.3"}, {"chr7", 49 000 000, 50 500 000, "p12.2"},
  {"chr7", 50 500 000, 54 000 000, "p12.1"}, {"chr7", 54 000 000, 58 000 000, "p11.2"}};

{subLists, minVal, maxVal, indices} = arrayletVariables[armBands, arm];

(* Input the 7p Segments' and Genes' Coordinates *)

segments = armSegments[7, arrayletMedian, medianAbsoluteDeviations];
genes = {"xcoord", "ycoord", "xcoord1", "ycoord1", "Displacement", "gene-name", "color",
  "xDisplacement"}, {698.5, -0.0211, 698.5, 0.008, 0.001, "RPA3", "Red", 30},
  {5472, 0.0066, 5472, -0.01, -0.0015, "POLD2", "Red", 30}};
genes[[2 ;;, 2]] = (genes[[2 ;;, 2]] - arrayletMedian) / medianAbsoluteDeviations;
genes[[2 ;;, 4]] = (genes[[2 ;;, 4]] - arrayletMedian) / medianAbsoluteDeviations;
scaledDisplacement = genes[[2 ;;, 5]] * 500;
genes[[2 ;;, 5]] = scaledDisplacement;

(* Create the 7p Arraylet Plot Display *)

xticks = xTicks[indices];

gArraylet = arrayletPlotDisplay[arm, subLists, xticks,
  minVal, maxVal, indices, segments, genes, "7p", "(d) ", colorDefinitions];

(* Create the 7p Tumor Datasets Raster Display *)

step = 5;
rastercontrast = 1;
sortedRaster = tumorRaster[tumor1, tumor2];

xticks = xTicksRaster[indices, armBands];

gRaster = rasterPlotDisplay[sortedRaster, xticks, "(f) "];

```

```

(* Classify the Patients into High and Low 7p Probelet Coefficients *)

probeletCutoff = 0.003947059214898124;
{lowGroup, highGroup, minVal, maxVal, probeletCutoff} =
  probeletVariables[xProbelets[[1]], probeletCutoff];

(* Create the 7p Probelet Display *)

xticks = {{-2.5, Style[Framed["-2.5", FrameStyle → None, FrameMargins → {{0, 0}, {0, -4.5}}],
  FontFamily → "Courier", FontSize → ticksize], {0, 0.02}},
  {-0.5, Style[Framed["-0.5", FrameStyle → None, FrameMargins → {{0, 0}, {0, -4.5}}],
  FontFamily → "Courier", FontSize → ticksize,
  FontTracking → "Narrow"], {0, 0.02}}, {probeletCutoff,
  Style[Framed[" " <> ToString[N[Round[probeletCutoff, 10^-1]]], FrameStyle → None,
  FrameMargins → {{0, 0}, {0, -4.5}}], FontFamily → "Courier",
  FontSize → ticksize, FontTracking → "Narrow"], {0, 0.02}},
  {2.5, Style[Framed[ToString[2.5], FrameStyle → None,
  FrameMargins → {{Automatic, Automatic}, {0, -4.5}}],
  FontFamily → "Courier", FontSize → ticksize], {0, 0.02}},
  {4.5, Style[Framed["4.5", FrameStyle → None, FrameMargins → {{0, 0}, {0, -4.5}}],
  FontFamily → "Courier", FontSize → ticksize], {0, 0.02}},
  {6.5, Style[Framed["6.5", FrameStyle → None, FrameMargins → {{0, 0}, {0, -4.5}}],
  FontFamily → "Courier", FontSize → ticksize], {0, 0.02}}};

gProbelet = probeletPlotDisplay[lowGroup, highGroup, xticks, probeletCutoff, "(e) "];

(* Combine the 7p Probelet, Tumor Arraylet, and Tumor Datasets Displays *)

figure2 = Grid[{{gArraylet, SpanFromLeft}, {gProbelet, gRaster}},
  Alignment → {{Right}, {Left, Right}}, Spacings → {2 → 0.2, 2 → 0}];

```

```
(* Compute the Xq Tensor GSVD *)
```

```
(* Read the Xq Datasets *)
```

```
tumor1 = Import[path <> "D_Tumor_1_Xq.txt", "Table"];  
tumor2 = Import[path <> "D_Tumor_2_Xq.txt", "Table"];  
normal1 = Import[path <> "D_Normal_1_Xq.txt", "Table"];  
normal2 = Import[path <> "D_Normal_2_Xq.txt", "Table"];  
ArrayNames = tumor1[[1, 5 ;;]];  
tumorProbeID = tumor1[[2 ;;, 1]];  
tumorProbeLoc = tumor1[[2 ;;, 2 ;; 4]];  
normalProbeID = normal1[[2 ;;, 1]];  
normalProbeLoc = normal1[[2 ;;, 2 ;; 4]];  
tumor1 = Drop[tumor1, 1, 4];  
tumor2 = Drop[tumor2, 1, 4];  
normal1 = Drop[normal1, 1, 4];  
normal2 = Drop[normal2, 1, 4];
```

```
(* Compute the Xq Tensor GSVD *)
```

```
{tumor1, tumor2, normal1, normal2, zTumorArraylets, zNormalArraylets, tumorCore,  
normalCore, xProbelets, yProbelets} = tGSVD[tumor1, tumor2, normal1, normal2];
```

```
labelsize = 14;  
ticksize = 10;  
colorDefinitions = Chop[Drop[Flatten[Table[{ColorConvert[Hue[a / 24], RGBColor],  
ColorConvert[Hue[(a + 12) / 24], RGBColor]}, {a, 10, -1, -1}]], {24}]];  
colorDefinitions = Join[colorDefinitions, colorDefinitions];
```

```
(* Create the Xq Generalized Fractions Display *)
```

```
{tumorFractions, normalFractions, entropy1, entropy2} =  
generalizedFractions[tumorCore, normalCore];  
gridx = {0, 0.02, 0.04, 0.06, 0.08, 0.1};  
framex = {"0", "0.02", "0.04", "0.06", "0.08", "0.1"};  
plotrange = {0.0021, 0.1};  
labelx =  
ColumnForm[{"(e) \!\(\*SubscriptBox[\(d\), \{1\}]\)\} = " <> ToString[entropy1], Center];  
labely = ColumnForm[{"Xq", "Subtensors"}, Center];  
xqTumorBarChart = barChartDisplay[tumorFractions, labelx, labely, gridx, framex, plotrange];  
labelx =  
ColumnForm[{"(f) \!\(\*SubscriptBox[\(d\), \{2\}]\)\} = " <> ToString[entropy2], Center];  
labely = " ";  
xqNormalBarChart =  
barChartDisplay[normalFractions, labelx, labely, gridx, framex, plotrange];
```

```
(* Input the Xq Chromosome Band Coordinates *)
```

```
{arrayletCentered, arrayletMedian, medianAbsoluteDeviations} =  
  centeredArraylet[zTumorArraylets[[All, 1]]];  
arm = Transpose[Join[Transpose[tumorProbeLoc], {arrayletCentered}]];  
armBands = {{{"#chrom", "chromStart", "chromEnd", "name"},  
  {"chrX", 60 600 000, 63 000 000, "q11.1"}, {"chrX", 63 000 000, 64 600 000, "q11.2"},  
  {"chrX", 64 600 000, 67 800 000, "q12"}, {"chrX", 67 800 000, 71 800 000, "q13.1"},  
  {"chrX", 71 800 000, 73 900 000, "q13.2"}, {"chrX", 73 900 000, 76 000 000, "q13.3"},  
  {"chrX", 76 000 000, 84 600 000, "q21.1"}, {"chrX", 84 600 000, 86 200 000, "q21.2"},  
  {"chrX", 86 200 000, 91 800 000, "q21.31"}, {"chrX", 91 800 000, 93 500 000, "q21.32"},  
  {"chrX", 93 500 000, 98 300 000, "q21.33"}, {"chrX", 98 300 000, 102 600 000, "q22.1"},  
  {"chrX", 102 600 000, 103 700 000, "q22.2"}, {"chrX", 103 700 000, 108 700 000, "q22.3"},  
  {"chrX", 108 700 000, 116 500 000, "q23"}, {"chrX", 116 500 000, 120 900 000, "q24"},  
  {"chrX", 120 900 000, 128 700 000, "q25"}, {"chrX", 128 700 000, 130 400 000, "q26.1"},  
  {"chrX", 130 400 000, 133 600 000, "q26.2"}, {"chrX", 133 600 000, 138 000 000, "q26.3"},  
  {"chrX", 138 000 000, 140 300 000, "q27.1"}, {"chrX", 140 300 000, 142 100 000, "q27.2"},  
  {"chrX", 142 100 000, 147 100 000, "q27.3"}, {"chrX", 147 100 000, 155 270 560, "q28"}}};  
  
{subLists, minVal, maxVal, indices} = arrayletVariables[armBands, arm];
```

```
(* Input the Xq Segments' and Genes' Coordinates *)
```

```
segments = armSegments["Xq", arrayletMedian, medianAbsoluteDeviations];  
genes = {{{"xcoord", "ycoord", "xcoord1", "ycoord1", "Displacement", "gene-name", "color",  
  "xDisplacement"}, {1063.5, -0.0064, 1063.5, 0.012, 0.0007, "PABPC5", "Red", 0},  
  {3569.5, 0.027, 3569.5, 0.01, -0.001, "MIR888", "Blue", 0},  
  {3882.6, 0.027, 3882.5, 0.036, 0.00035, "MIR224/452", "Blue", 0},  
  {3996.5, 0.027, 3996.5, 0.01, -0.001, "BCAP31", "Red", 0}}};  
genes[[2 ;;, 2]] = (genes[[2 ;;, 2]] - arrayletMedian) / medianAbsoluteDeviations;  
genes[[2 ;;, 4]] = (genes[[2 ;;, 4]] - arrayletMedian) / medianAbsoluteDeviations;  
scaledDisplacement = genes[[2 ;;, 5]] * 500;  
genes[[2 ;;, 5]] = scaledDisplacement;
```

```
(* Create the Xq Arraylet Plot *)
```

```
xticks = xTicks[indices];  
xticks[[10]][[2]] =  
  Style[Framed["10 ", FrameStyle → None, FrameMargins → {{Automatic, Automatic}, {0, 2}}],  
  FontFamily → "Courier", FontSize → ticksize];  
xticks[[11]][[2]] = Style[Framed[" 11", FrameStyle → None, FrameMargins →  
  {{Automatic, Automatic}, {0, 2}}], FontFamily → "Courier", FontSize → ticksize];  
xticks[[22]][[2]] = Style[Framed["22 ", FrameStyle → None, FrameMargins →  
  {{Automatic, Automatic}, {0, 2}}], FontFamily → "Courier", FontSize → ticksize];  
xticks[[23]][[2]] = Style[Framed[" 23", FrameStyle → None, FrameMargins →  
  {{Automatic, Automatic}, {0, 2}}], FontFamily → "Courier", FontSize → ticksize];  
  
gArraylet = arrayletPlotDisplay[arm, subLists, xticks,  
  minVal, maxVal, indices, segments, genes, "Xq", "(g) ", colorDefinitions];
```



```
(* Create the Xq Tumor Datasets Raster Display *)
```

```
step = 5;  
rastercontrast = 1;  
sortedRaster = tumorRaster[tumor1, tumor2];  
  
xticks = xTicksRaster[indices, armBands];  
xticks[[10]][[2]] =  
  Style[Framed["10 ", FrameStyle → None, FrameMargins → {{Automatic, Automatic}, {0, -1}},  
    FontFamily → "Courier", FontSize → ticksize];  
xticks[[11]][[2]] = Style[Framed[" 11", FrameStyle → None, FrameMargins →  
  {{Automatic, Automatic}, {0, -1}}, FontFamily → "Courier", FontSize → ticksize];  
xticks[[22]][[2]] = Style[Framed["22 ", FrameStyle → None, FrameMargins →  
  {{Automatic, Automatic}, {0, -1}}, FontFamily → "Courier", FontSize → ticksize];  
xticks[[23]][[2]] = Style[Framed[" 23", FrameStyle → None, FrameMargins →  
  {{Automatic, Automatic}, {0, -1}}, FontFamily → "Courier", FontSize → ticksize];  
  
gRaster = rasterPlotDisplay[sortedRaster, xticks, "(i) "];
```

```
(* Classify the Patients into High and Low Xq Probelet Coefficients *)
```

```
probeletCutoff = 0.005459355777945107;  
{lowGroup, highGroup, minVal, maxVal, probeletCutoff} =  
  probeletVariables[xProbelets[[1]], probeletCutoff];  
  
xticks = {{-8.5, Style[Framed["-8.5", FrameStyle → None, FrameMargins → {{0, 0}, {0, -4.5}},  
  FontFamily → "Courier", FontSize → ticksize], {0, 0.02}},  
  {-6.5, Style[Framed["-6.5", FrameStyle → None, FrameMargins → {{0, 0}, {0, -4.5}},  
  FontFamily → "Courier", FontSize → ticksize], {0, 0.02}},  
  {-4.5, Style[Framed["-4.5", FrameStyle → None, FrameMargins → {{0, 0}, {0, -4.5}},  
  FontFamily → "Courier", FontSize → ticksize], {0, 0.02}},  
  {-2.5, Style[Framed["-2.5", FrameStyle → None, FrameMargins → {{0, 0}, {0, -4.5}},  
  FontFamily → "Courier", FontSize → ticksize], {0, 0.02}},  
  {-0.5, Style[Framed["-0.5 ", FrameStyle → None, FrameMargins → {{0, 0}, {0, -4.5}},  
  FontFamily → "Courier", FontSize → ticksize, FontTracking → "Narrow"], {0, 0.02}},  
  {probeletCutoff, Style[Framed[" " <> ToString[N[Round[probeletCutoff, 10^-1]]],  
  FrameStyle → None, FrameMargins → {{0, 0}, {0, -4.5}}, FontFamily → "Courier",  
  FontSize → ticksize, FontTracking → "Narrow"], {0, 0.02}}, {2.5, Style[Framed[  
  ToString[2.5], FrameStyle → None, FrameMargins → {{Automatic, Automatic}, {0, -4.5}},  
  FontFamily → "Courier", FontSize → ticksize], {0, 0.02}},  
  {4.5, Style[Framed["4.5", FrameStyle → None, FrameMargins → {{0, 0}, {0, -4.5}},  
  FontFamily → "Courier", FontSize → ticksize], {0, 0.02}},  
  {6.5, Style[Framed["6.5", FrameStyle → None, FrameMargins → {{0, 0}, {0, -4.5}},  
  FontFamily → "Courier", FontSize → ticksize], {0, 0.02}}};
```

```
(* Create the Xq Probelet Display *)
```

```
gProbelet = probeletPlotDisplay[lowGroup, highGroup, xticks, probeletCutoff, "(h) "];
```

```
(* Combine the Xq Probelet, Tumor Arraylet, and Tumor Datasets Displays *)
```

```
figure3 = Grid[{{gArraylet, SpanFromLeft}, {gProbelet, gRaster}},  
  Alignment → {{Right}, {Left, Right}}, Spacings → {2 → 0.2, 2 → 0}];
```

(\* Display Probelets, Tumor Arraylets, and Tumor Datasets \*)

fig2 = Column[{figure1, figure2, figure3}, Spacings → 1]

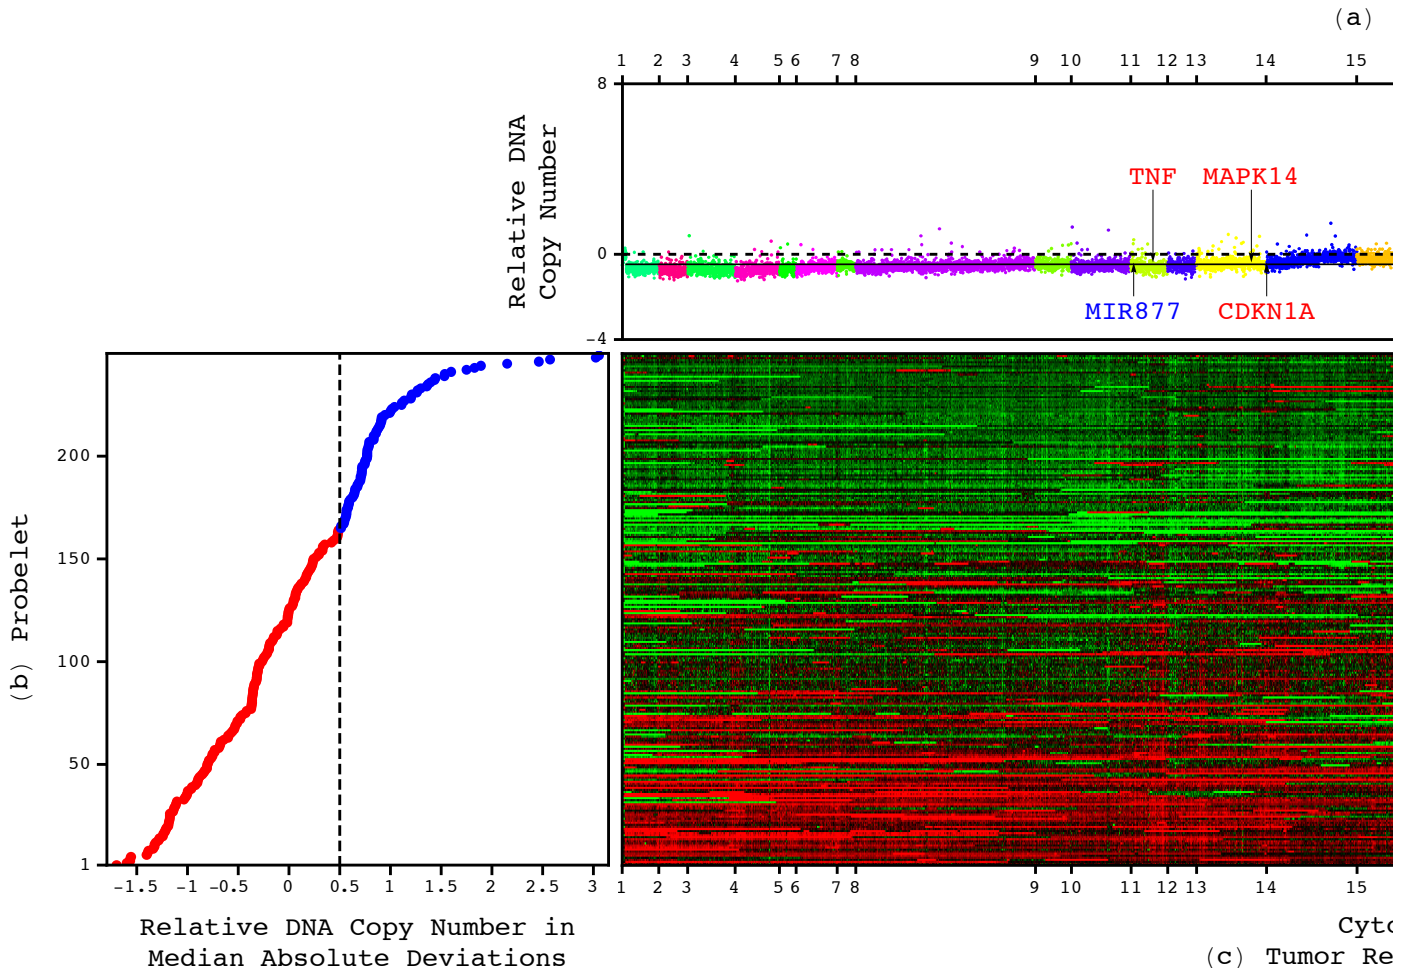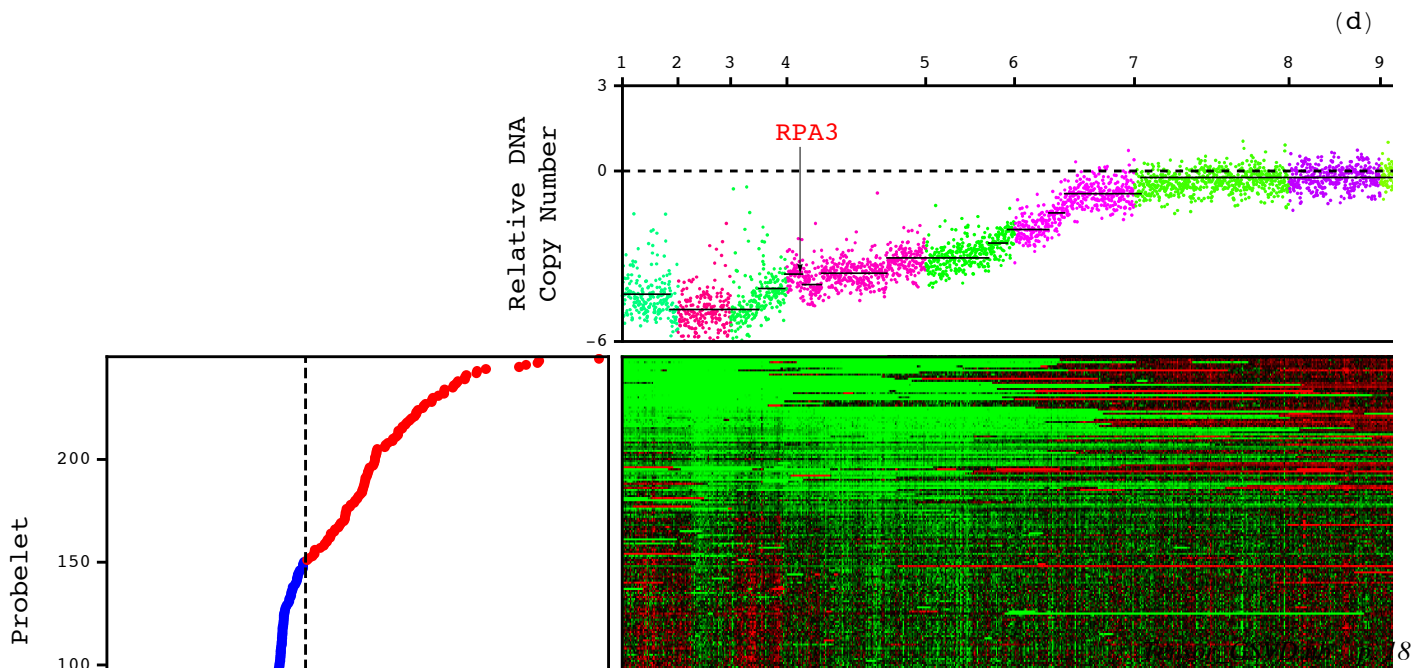

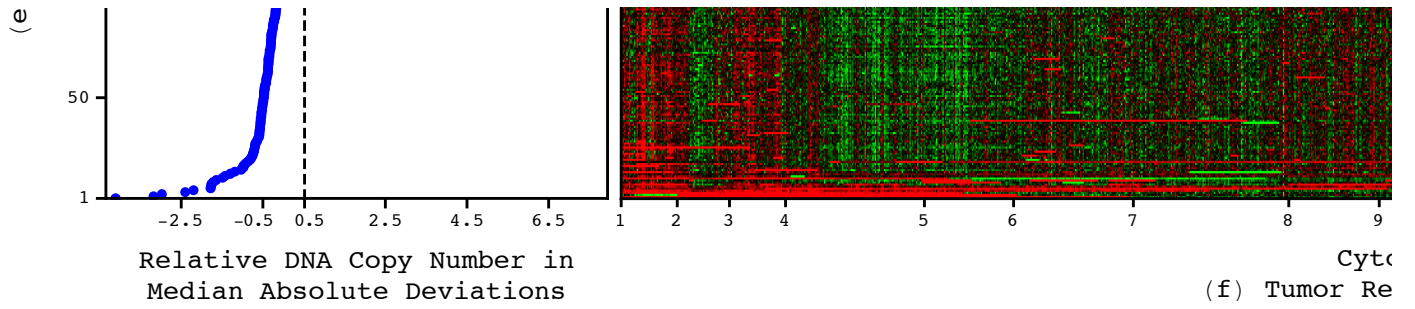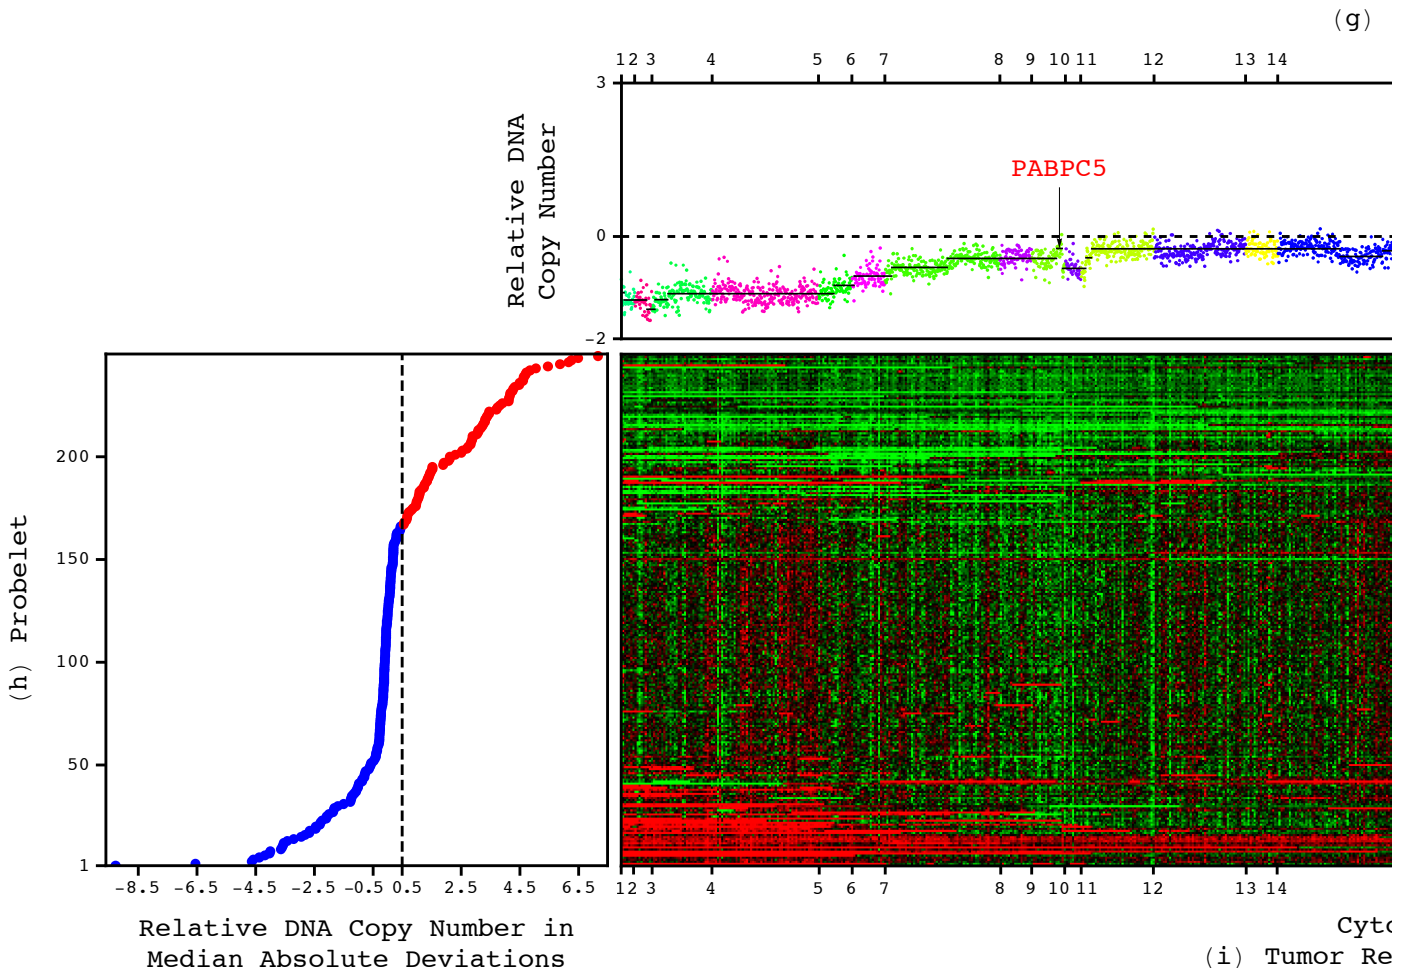

Export[path <> "Figure\_2.pdf", fig2, "PDF"];

(\* Display the Tumor and Normal Generalized Fractions Bar Chart Display \*)

```
figC = GraphicsGrid[{{sixp12pTumorBarChart, sixp12pNormalBarChart},
  {sevenpTumorBarChart, sevenpNormalBarChart}, {xqTumorBarChart, xqNormalBarChart}},
  ImageSize → 500, Spacings → {-15, {0, -20, -27, 0}}]
```

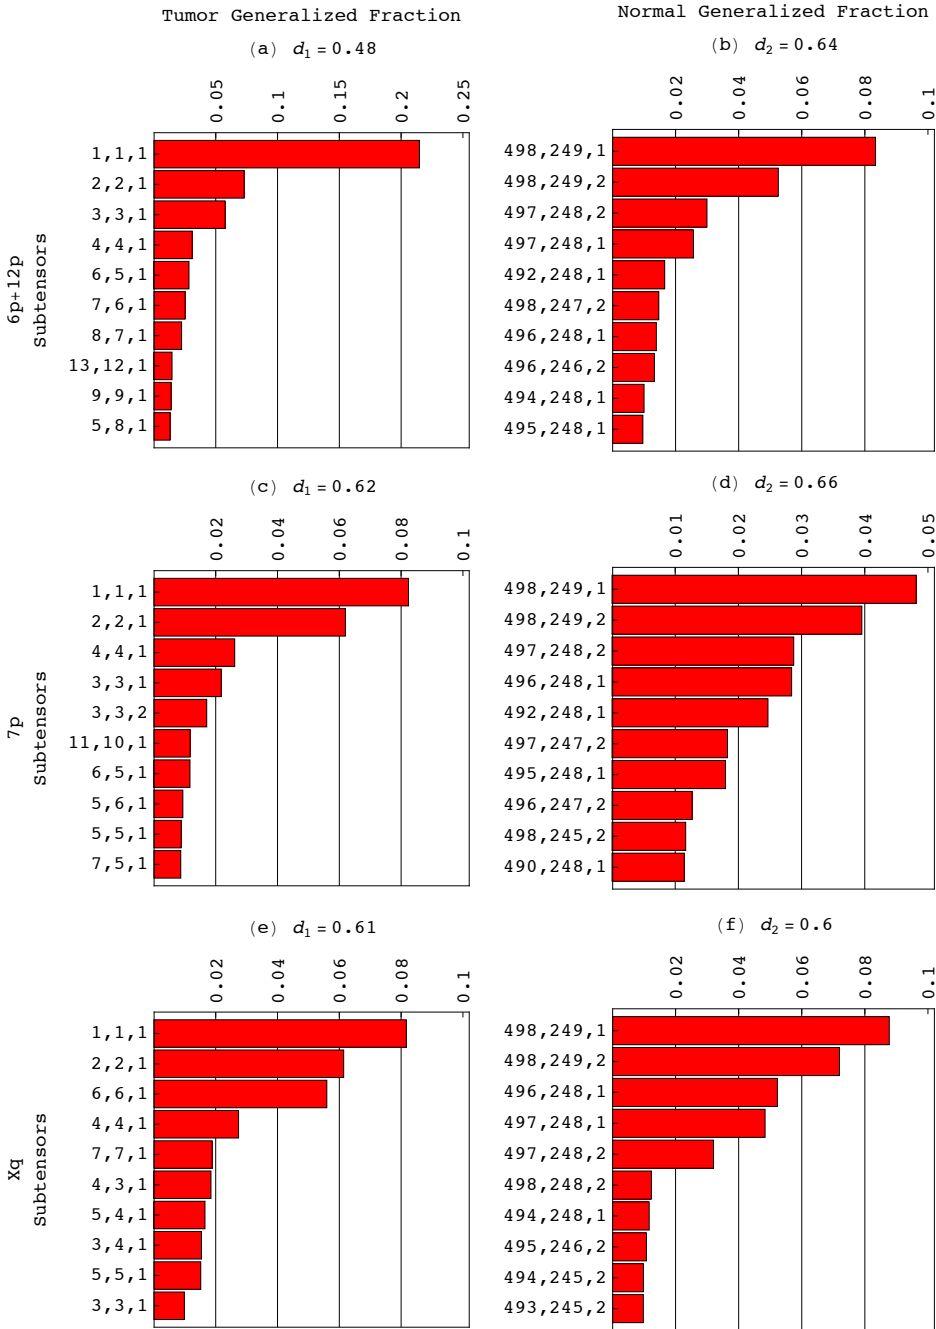

```
Export[path <> "Figure_C.pdf", figC, "PDF", ImageSize → 500];
```

```
(* Compute and Display Kaplan-Meier Survival Curves and Log-Rank Test P-Values *)
```

```
monthConversion = (365.25 / 12);
Clear[framex, framey, labelx, labely, xlabel, ylabel];

(* Read Survival and Classification Data *)

annotationColumn[annotation_] :=
  Transpose[annotations][[Position[annotationNames, annotation][[1, 1]]]];
options[annotation_] := Intersection[annotationColumn[annotation]];
optionNumbers[annotation_] := Dimensions[options[annotation]][[1]];
optionCounts[annotation_] :=
  Table[Count[annotationColumn[annotation], options[annotation][[a]]],
    {a, 1, optionNumbers[annotation]}];

(* Identify the Classification Groups *)

order[annotation_] := Sort[optionCounts[annotation], Greater];
first[annotation_] := Position[options[annotation], firstAnnotation][[1]][[1]];
second[annotation_] := Position[options[annotation], secondAnnotation][[1]][[1]];
third[annotation_] := Position[options[annotation], thirdAnnotation][[1]][[1]];
fourth[annotation_] := Position[options[annotation], fourthAnnotation][[1]][[1]];
groups[annotation_] :=
  Sort[Transpose[Join[{annotationColumn[annotation]}, {times}, {status}]]];
optionCountsPosition[annotation_] :=
  Join[{0}, Table[Sum[optionCounts[annotation][[a]], {a, 1, b}],
    {b, 1, Dimensions[optionCounts[annotation]][[1]]}]];
firstGroup[annotation_] := Select[groups[annotation], #[[1]] == firstAnnotation &];
secondGroup[annotation_] := Select[groups[annotation], #[[1]] == secondAnnotation &];
thirdGroup[annotation_] := Select[groups[annotation], #[[1]] == thirdAnnotation &];
fourthGroup[annotation_] := Select[groups[annotation], #[[1]] == fourthAnnotation &];
```

(\* Evaluate the Kaplan-Meier Survival Curves of the Classification Groups \*)

```

evaluateFirst[annotation_] := {
  nFirstGroup =
    optionCounts[annotation][[Position[options[annotation], firstAnnotation][[1]][[1]]]];
  oFirstGroup = nFirstGroup;
  group = Transpose[firstGroup[annotation]][[2]];
  Do[If[firstGroup[annotation][[a, 3]] == 0, group = Drop[group, {a}],
    {a, nFirstGroup, 1, -1}];
  firstMedian = 0;
  firstLine = {{0, 1}};
  firstLines = {RGBColor[0, 0, 1], Thickness[0.0075]};
  y = 1;
  Do[
    If[firstGroup[annotation][[a, 3]] == 0,
      {oFirstGroup = oFirstGroup - 1;
        firstLines = Join[firstLines, {Line[{{firstGroup[annotation][[a, 2]], y + 0.02},
          {firstGroup[annotation][[a, 2]], y - 0.02}}]};
        If[a == optionCounts[annotation][[first[annotation]]],
          firstLine = Join[firstLine, {{firstGroup[annotation][[a, 2]], y}}]},
        {firstLine = Join[firstLine, {{firstGroup[annotation][[a, 2]], y}}];
          y = y * (nFirstGroup - a) / (nFirstGroup - a + 1);
          If[firstMedian == 0, If[y ≤ 0.5, firstMedian = Round[firstGroup[annotation][[a, 2]]]];
          firstLine = Join[firstLine, {{firstGroup[annotation][[a, 2]], y}}]},
        {a, 1, optionCounts[annotation][[first[annotation]]]};
      If[firstMedian == 0, firstMedian =
        Round[firstGroup[annotation][[optionCounts[annotation][[first[annotation]]], 2]]];
        firstLine = Graphics[{RGBColor[0, 0, 1], Thickness[0.0075], Line[firstLine]}];
        firstLines = Graphics[firstLines];
        textFirstGroup = Graphics[Text[
          Style[ColumnForm[{
            StringReplace[options[annotation][[first[annotation]]], "_" → " ",
            StringJoin["N=", ToString[nFirstGroup]],
            StringJoin["O=", ToString[oFirstGroup]]},
            Center], {RGBColor[0, 0, 1], FontFamily → "Courier"}],
          textCoordinates[[1]]]]]

```

```

evaluateSecond[annotation_] := {
  nSecondGroup =
    optionCounts[annotation][[Position[options[annotation], secondAnnotation][[1]][[1]]]];
  oSecondGroup = nSecondGroup;
  group = Transpose[secondGroup[annotation]][[2]];
  Do[If[secondGroup[annotation][[a, 3]] == 0, group = Drop[group, {a}],
    {a, nSecondGroup, 1, -1}];
  secondMedian = 0;
  secondLine = {{0, 1}};
  secondLines = {RGBColor[1, 0, 0], Thickness[0.0075]};
  y = 1;
  Do[
    If[secondGroup[annotation][[a, 3]] == 0,
      {oSecondGroup = oSecondGroup - 1;
        secondLines = Join[secondLines, {Line[{{secondGroup[annotation][[a, 2]], y + 0.02},
          {secondGroup[annotation][[a, 2]], y - 0.02}}]};
        If[a == optionCounts[annotation][[second[annotation]]],
          secondLine = Join[secondLine, {{secondGroup[annotation][[a, 2]], y}}]};
        {secondLine = Join[secondLine, {{secondGroup[annotation][[a, 2]], y}}];
          y = y * (nSecondGroup - a) / (nSecondGroup - a + 1);
          If[secondMedian == 0,
            If[y ≤ 0.5, secondMedian = Round[secondGroup[annotation][[a, 2]]]];
            secondLine = Join[secondLine, {{secondGroup[annotation][[a, 2]], y}}]};
        {a, 1, optionCounts[annotation][[second[annotation]]]};
      If[secondMedian == 0, secondMedian =
        Round[secondGroup[annotation][[optionCounts[annotation][[second[annotation]]], 2]]];
        secondLine = Graphics[{RGBColor[1, 0, 0], Thickness[0.0075], Line[secondLine]};
        secondLines = Graphics[secondLines];
        textSecondGroup = Graphics[
          Text[Style[ColumnForm[{
            StringReplace[options[annotation][[second[annotation]]], "_" → " "],
            StringJoin["N=", ToString[nSecondGroup]],
            StringJoin["O=", ToString[oSecondGroup]]},
            Center], {RGBColor[1, 0, 0], FontFamily → "Courier"}],
            textCoordinates[[2]]]]}

```

```

evaluateThird[annotation_, displayNumber_] :=
If[displayNumber ≥ 3, {
  nThirdGroup =
    optionCounts[annotation][[Position[options[annotation], thirdAnnotation][[1]][[1]]]];
  oThirdGroup = nThirdGroup;
  group = Transpose[thirdGroup[annotation]][[2]];
  Do[If[thirdGroup[annotation][[a, 3]] == 0, group = Drop[group, {a}],
    {a, nThirdGroup, 1, -1}];
  thirdMedian = 0;
  thirdLine = {{0, 1}};
  thirdLines = {RGBColor[0, 0.5, 0], Thickness[0.0075]};
  y = 1;
  Do[
    If[thirdGroup[annotation][[a, 3]] == 0,
      {oThirdGroup = oThirdGroup - 1;
        thirdLines = Join[thirdLines, {Line[{{thirdGroup[annotation][[a, 2]], y + 0.02},
          {thirdGroup[annotation][[a, 2]], y - 0.02}}]};
        If[a == optionCounts[annotation][[third[annotation]]],
          thirdLine = Join[thirdLine, {{thirdGroup[annotation][[a, 2]], y}}];
        {thirdLine = Join[thirdLine, {{thirdGroup[annotation][[a, 2]], y}}];
          y = y * (nThirdGroup - a) / (nThirdGroup - a + 1);
          If[thirdMedian == 0, If[y ≤ 0.5, thirdMedian = Round[thirdGroup[annotation][[a, 2]]]];
          thirdLine = Join[thirdLine, {{thirdGroup[annotation][[a, 2]], y}}];
        {a, 1, optionCounts[annotation][[third[annotation]]]};
      If[thirdMedian == 0, thirdMedian =
        Round[thirdGroup[annotation][[optionCounts[annotation][[third[annotation]]], 2]]];
      thirdLine = Graphics[{RGBColor[0, 0.5, 0], Thickness[0.0075], Line[thirdLine]};
      thirdLines = Graphics[thirdLines];
      textThirdGroup = Graphics[
        Text[Style[ColumnForm[{
          StringReplace[options[annotation][[third[annotation]]], "_" → " ",
          StringJoin["N=", ToString[nThirdGroup]],
          StringJoin["O=", ToString[oThirdGroup]]},
          Center], {RGBColor[0, 0.5, 0], FontFamily → "Courier"}],
          textCoordinates[[3]]],
      {thirdLine = Graphics[];
        thirdLines = Graphics[];
        textThirdGroup = Graphics[]}]

```



```

evaluateFourth[annotation_, displayNumber_] :=
If[displayNumber ≥ 4, {
  nFourthGroup =
    optionCounts[annotation][[Position[options[annotation], fourthAnnotation][[1]][[1]]]];
  oFourthGroup = nFourthGroup;
  group = Transpose[fourthGroup[annotation]][[2]];
  Do[If[fourthGroup[annotation][[a, 3]] == 0, group = Drop[group, {a}]],
    {a, nFourthGroup, 1, -1}];
  fourthMedian = 0;
  fourthLine = {{0, 1}};
  fourthLines = {RGBColor[0.75, 0, 1], Thickness[0.0075]};
  y = 1;
  Do[
    If[fourthGroup[annotation][[a, 3]] == 0,
      {oFourthGroup = oFourthGroup - 1;
        fourthLines = Join[fourthLines, {Line[{{fourthGroup[annotation][[a, 2]], y + 0.02},
          {fourthGroup[annotation][[a, 2]], y - 0.02}}]};
        If[a == optionCounts[annotation][[fourth[annotation]]],
          fourthLine = Join[fourthLine, {{fourthGroup[annotation][[a, 2]], y}}]};
        {fourthLine = Join[fourthLine, {{fourthGroup[annotation][[a, 2]], y}}];
          y = y * (nFourthGroup - a) / (nFourthGroup - a + 1);
          If[fourthMedian == 0,
            If[y ≤ 0.5, fourthMedian = Round[fourthGroup[annotation][[a, 2]]]];
            fourthLine = Join[fourthLine, {{fourthGroup[annotation][[a, 2]], y}}]};
        {a, 1, optionCounts[annotation][[fourth[annotation]]]};
      If[fourthMedian == 0, fourthMedian =
        Round[fourthGroup[annotation][[optionCounts[annotation][[fourth[annotation]]], 2]]];
        fourthLine = Graphics[{RGBColor[0.75, 0, 1], Thickness[0.0075], Line[fourthLine]};
        fourthLines = Graphics[fourthLines];
        textFourthGroup = Graphics[Text[
          Style[ColumnForm[{
            StringReplace[options[annotation][[fourth[annotation]]], "_" → " "],
            StringJoin["N=", ToString[nFourthGroup]],
            StringJoin["O=", ToString[oFourthGroup]],
            Center], {RGBColor[0.75, 0, 1], FontFamily → "Courier"}],
          textCoordinates[[4]]],
        {fourthLine = Graphics[];
          fourthLines = Graphics[];
          textFourthGroup = Graphics[]}]

```

(\* Evaluate the Log-Rank Test P-value \*)

```
evaluatePValue[annotation_] := {
  statistics = Sort[Transpose[Join[{times}, {annotationColumn[annotation]}, {status}]]];
  firstObservations = Table[If[
    statistics[[a, 2]] == options[annotation][[first[annotation]]], statistics[[a, 3]], 0],
    {a, 1, patients}];
  firstEvents = Table[If[statistics[[a, 2]] == options[annotation][[first[annotation]]],
    ReplaceAll[statistics[[a, 3]], 0 → 1], 0],
    {a, 1, patients}];
  secondObservations = Table[If[statistics[[a, 2]] ==
    options[annotation][[second[annotation]]], statistics[[a, 3]], 0],
    {a, 1, patients}];
  secondEvents = Table[If[statistics[[a, 2]] == options[annotation][[second[annotation]]],
    ReplaceAll[statistics[[a, 3]], 0 → 1], 0],
    {a, 1, patients}];
  Do[If[statistics[[a, 1]] == statistics[[a - 1, 1]], {
    firstObservations[[a - 1]] = firstObservations[[a - 1]] + firstObservations[[a]];
    firstObservations = Drop[firstObservations, {a}];
    firstEvents[[a - 1]] = firstEvents[[a - 1]] + firstEvents[[a]];
    firstEvents = Drop[firstEvents, {a}];
    secondObservations[[a - 1]] = secondObservations[[a - 1]] + secondObservations[[a]];
    secondObservations = Drop[secondObservations, {a}];
    secondEvents[[a - 1]] = secondEvents[[a - 1]] + secondEvents[[a]];
    secondEvents = Drop[secondEvents, {a}]
  }], {a, patients, 2, -1}];
  timesNumbers = Dimensions[firstObservations][[1]];
  firstNumbers =
    Table[Total[firstEvents] - Total[Take[firstEvents, 1 ;; a - 1]], {a, 1, timesNumbers}];
  secondNumbers = Table[Total[secondEvents] - Total[Take[secondEvents, 1 ;; a - 1]],
    {a, 1, timesNumbers}];
  observations = firstObservations + secondObservations;
  numbers = firstNumbers + secondNumbers;
  firstExpectations = Table[If[numbers[[a]] == 0, 0,
    N[observations[[a]] * firstNumbers[[a]] / numbers[[a]]],
    {a, 1, timesNumbers}];
  secondExpectations = Table[If[numbers[[a]] == 0, 0,
    N[observations[[a]] * secondNumbers[[a]] / numbers[[a]]],
    {a, 1, timesNumbers}];
  variances = Table[If[numbers[[a]] ≤ 1, 0,
    N[firstNumbers[[a]] * secondNumbers[[a]] * observations[[a]] *
      (numbers[[a]] - observations[[a]]) / numbers[[a]]^2 / (numbers[[a]] - 1)],
    {a, 1, timesNumbers}];
  z = (N[Total[firstObservations - firstExpectations]])^2 / N[Total[variances]];
  pValue = 1 - CDF[ChiSquareDistribution[1], {z}][[1]]];
```

```
(* Create the Kaplan-Meier Survival Curves *)
```

```
w = 0.0075;
months = 100;
framey[ylabel_] := ReplaceAll[ReplaceAll[
  Table[{a, Style[If[ylabel == "False", " ", ToString[a]], FontFamily → "Courier"]},
    {a, 0, 1, 0.25}], "1." → "1", "0." → "0"];
labelx[xlabel_] := If[xlabel == True, Style["Survival Time (Months)",
  FontFamily → "Courier"], ""];
plotlabelx[annotation_, xlabel_, columnLabel_] :=
  Style[ColumnForm[
    Which[hazardRatio == "blank", {Style[StringJoin[" ", columnLabel], FontSize → 14],
      StringJoin[xlabel, " ", StringReplace[StringReplace[StringReplace[
        StringReplace[annotation, "_6p+12p" → "", "_7p" → "", "_Xq" → "", "_" → " "]],
        StringJoin[" P-value = ", ToString[TraditionalForm[
          ScientificForm[pValue, 2, NumberPoint →
            If[Dimensions[Characters[ToString[NumberForm[pValue, 2, NumberFormat → (#1 &),
              ExponentFunction → (# &)]]][[1]] < 3, ".0", "."]]]], "\n"}],
      hazardRatio == "", {Style[StringJoin[" ", columnLabel], FontSize → 14],
        StringJoin[xlabel, " ", StringReplace[StringReplace[StringReplace[
          StringReplace[annotation, "_6p+12p" → "", "_7p" → "", "_Xq" → "", "_" → " "]],
          StringJoin[" P-value = ", ToString[TraditionalForm[
            ScientificForm[pValue, 2, NumberPoint →
              If[Dimensions[Characters[ToString[NumberForm[pValue, 2, NumberFormat → (#1 &),
                ExponentFunction → (# &)]]][[1]] < 3, ".0", "."]]]],
          ]]]},
      True, {Style[StringJoin[" ", columnLabel], FontSize → 14],
        StringJoin[xlabel, " ", StringReplace[StringReplace[StringReplace[
          StringReplace[annotation, "_6p+12p" → "", "_7p" → "", "_Xq" → "", "_" → " "]],
          StringJoin[" P-value = ", ToString[TraditionalForm[
            ScientificForm[pValue, 2, NumberPoint →
              If[Dimensions[Characters[ToString[NumberForm[pValue, 2, NumberFormat → (#1 &),
                ExponentFunction → (# &)]]][[1]] < 3, ".0", "."]]]],
          ]]]], StringJoin[" Hazard Ratio", hazardRatio]}], Left],
    FontFamily → "Courier", FontSize → 12];
```

```

labely[ylabel_] :=
  If[ylabel == "False", Style[ColumnForm[{" ", " "}, Center], FontFamily → "Courier"],
    Style[ColumnForm[{title, ylabel}, Center], FontFamily → "Courier"]];
display[annotation_, displayNumber_, xplotlabel_,
  xlabel_, ylabel_, medianTicks_, highlight_, columnLabel_] := {
  {firstMedian, secondMedian, thirdMedian, fourthMedian} = Table[0, {4}];
  evaluateFirst[annotation];
  evaluateSecond[annotation];
  evaluateThird[annotation, displayNumber];
  evaluateFourth[annotation, displayNumber];
  framex = If[displayNumber == 2,
    {{0, Style["0", FontFamily → "Courier"]}, {80, Style["80", FontFamily → "Courier"]}},
    {firstMedian, If[firstMedian == secondMedian, "",
      Style[StringJoin[medianTicks[[1]], ToString[firstMedian], medianTicks[[2]]],
        {RGBColor[0, 0, 1], FontFamily → "Courier"}]}},
    {secondMedian, Style[StringJoin[medianTicks[[3]], ToString[secondMedian],
      medianTicks[[4]]], {RGBColor[1, 0, 0], FontFamily → "Courier"}]}},
    {{0, Style["0", FontFamily → "Courier"]},
    If[76 < firstMedian < 84 || 76 < secondMedian < 84 || 76 < thirdMedian < 84 ||
      76 < fourthMedian < 84, {0, Style["0", FontFamily → "Courier"]},
    {80, Style["80", FontFamily → "Courier"]}], If[fourthMedian ≠ 0,
    {fourthMedian, Style[StringJoin[medianTicks[[7]], If[fourthMedian == firstMedian,
      "", If[fourthMedian == thirdMedian, "", ToString[fourthMedian]]],
      medianTicks[[8]]], {RGBColor[0.75, 0, 1], FontFamily → "Courier"}]},
    {fourthMedian, Style[StringJoin[medianTicks[[7]], If[fourthMedian == firstMedian,
      "", If[fourthMedian == thirdMedian, "", ""], medianTicks[[8]]],
      {RGBColor[0.75, 0, 1], FontFamily → "Courier"}]}},
    If[thirdMedian ≠ 0, {thirdMedian, Style[StringJoin[medianTicks[[5]], ToString[
      thirdMedian], medianTicks[[6]]], {RGBColor[0, 0.5, 0], FontFamily → "Courier"}]},
    {thirdMedian, Style[StringJoin[medianTicks[[5]], "", medianTicks[[6]]],
      {RGBColor[0, 0.5, 0], FontFamily → "Courier"}]}},
    If[secondMedian ≠ 0, {secondMedian, Style[StringJoin[medianTicks[[3]], ToString[
      secondMedian], medianTicks[[4]]], {RGBColor[1, 0, 0], FontFamily → "Courier"}]},
    {secondMedian, Style[StringJoin[medianTicks[[3]], "", medianTicks[[4]]],
      {RGBColor[1, 0, 0], FontFamily → "Courier"}]}},
    If[firstMedian ≠ 0, {firstMedian, Style[StringJoin[medianTicks[[1]], ToString[
      firstMedian], medianTicks[[2]]], {RGBColor[0, 0, 1], FontFamily → "Courier"}]},
    {firstMedian, Style[StringJoin[medianTicks[[1]], "", medianTicks[[2]]],
      {RGBColor[0, 0, 1], FontFamily → "Courier"}]}]}
  ]];
If[displayNumber == 2, evaluatePValue[annotation]];
Show[Graphics[If[highlight == True, {RGBColor[1, 1, 0.8], Rectangle[{
  Min[Select[{{firstMedian, secondMedian, thirdMedian, fourthMedian}, # ≠ 0 &]], -0.025},
  Max[
    Select[{{firstMedian, secondMedian, thirdMedian, fourthMedian}, # ≠ 0 &]], 1.025}]}],
  {}]],
  fourthLine, fourthLines, textFourthGroup,
  thirdLine, thirdLines, textThirdGroup,
  firstLine, firstLines, textFirstGroup,
  secondLine, secondLines, textSecondGroup},
  GridLines → {None, {{0.5, Thickness[0.0025]}},
  Frame → True,
  FrameTicks → {framex, framey[ylabel], None, None},
  FrameLabel → {labelx[xlabel], labely[ylabel], None, None},
  PlotLabel → plotlabelx[annotation, xplotlabel, columnLabel],
  AspectRatio → 1,
  PlotRange → {{-0.1 * months, 1.025 * months}, {-0.025, 1.025}},
  ImageSize → 250]}

```

```
(* Display the Survival Analyses of the Discovery and Validation Sets of Patients Classified by the Tensor GSVD *)
```

```
title = "Fraction of Surviving Patients";

stream = path <> "Discovery_Patients.txt";
annotations = Import[stream, "Table"];
{patients, annotationsNumber} = Dimensions[annotations] - {1, 1};
annotationNames = Take[annotations, 1, {2, annotationsNumber + 1}][[1]];
annotations = Drop[Import[stream, "Table"], 1, 1];
Clear[stream];

times = Table[
  If[annotationColumn["Days_Death"][[a]] == "Null",
    If[annotationColumn["Days_Followup"][[a]] == "Null",
      "Null",
      annotationColumn["Days_Followup"][[a]] / monthConversion],
    annotationColumn["Days_Death"][[a]] / monthConversion],
  {a, 1, patients}];
status = Table[If[annotationColumn["Days_Death"][[a]] == "Null",
  If[annotationColumn["Days_Followup"][[a]] == "Null", 2, 0], 1],
  {a, 1, patients}];
positionNull = Position[status, 2];
Do[{
  annotations = Drop[annotations, positionNull[[a]]],
  times = Drop[times, positionNull[[a]]],
  status = Drop[status, positionNull[[a]]],
  {a, Dimensions[positionNull][[1]], 1, -1}
patients = patients - Dimensions[positionNull][[1]];

displayNumber = 2;
annotation = "Probelet_6p+12p_(Coeff.)";
firstAnnotation = "High";
secondAnnotation = "Low";
highlight = True;
xplotlabel = "(a)";
xlabel = False;
ylabel = "from the Discovery Set";
medianTicks = Table["", {a, 1, 8}];
hazardRatio = "= 1.7";
columnLabel = "6p+12p";
textCoordinates = {{0.09 * months, 0.1}, {0.865 * months, 0.9}};
g1 = Show[display[annotation, displayNumber, xplotlabel,
  xlabel, ylabel, medianTicks, highlight, columnLabel], ImageSize -> 250];

displayNumber = 2;
annotation = "Probelet_7p_(Coeff.)";
firstAnnotation = "Low";
secondAnnotation = "High";
highlight = True;
xplotlabel = "(b)";
xlabel = False;
ylabel = "False";
medianTicks = Table["", {a, 1, 8}];
hazardRatio = "= 1.7";
columnLabel = "7p";
textCoordinates = {{0.09 * months, 0.1}, {0.865 * months, 0.9}};
g2 = Show[display[annotation, displayNumber, xplotlabel,
  xlabel, ylabel, medianTicks, highlight, columnLabel], ImageSize -> 250];
```

```

displayNumber = 2;
annotation = "Probelet_Xq_(Coeff.)";
firstAnnotation = "Low";
secondAnnotation = "High";
highlight = True;
xplotlabel = "(c)";
xlabel = False;
ylabel = "False";
medianTicks = Table["", {a, 1, 8}];
hazardRatio = "= 1.6";
columnLabel = "Xq";
textCoordinates = {{0.09 * months, 0.1}, {0.865 * months, 0.9}};
g3 = Show[display[annotation, displayNumber, xplotlabel,
  xlabel, ylabel, medianTicks, highlight, columnLabel], ImageSize → 250];

displayNumber = 4;
annotation = "Probelet_6p+12p/Tumor_Stage";
firstAnnotation = "High/III,IV";
secondAnnotation = "Low/I,II";
thirdAnnotation = "Low/III,IV";
fourthAnnotation = "High/I,II";
highlight = True;
xplotlabel = "(d)";
xlabel = False;
ylabel = "from the Discovery Set";
medianTicks = Table["", {a, 1, 8}];
medianTicks[[2]] = " ";
medianTicks[[6]] = " ";
medianTicks[[7]] = " ";
hazardRatio = "s = 1.5/4.0";
pValue = 4.2 * 10^-4;
columnLabel = "";
textCoordinates =
  {{0.09 * months, 0.1}, {0.865 * months, 0.9}, {0.09 * months, 0.35}, {0.09 * months, 0.6}};
g4 = Show[display[annotation, displayNumber, xplotlabel, xlabel,
  ylabel, medianTicks, highlight, columnLabel], ImageSize → 250];

displayNumber = 4;
annotation = "Probelet_7p/Tumor_Stage";
firstAnnotation = "Low/III,IV";
secondAnnotation = "High/I,II";
thirdAnnotation = "High/III,IV";
fourthAnnotation = "Low/I,II";
highlight = True;
xplotlabel = "(e)";
xlabel = False;
ylabel = "False";
medianTicks = Table["", {a, 1, 8}];
medianTicks[[4]] = " ";
medianTicks[[7]] = " ";
hazardRatio = "s = 1.6/4.2";
pValue = 1.1 * 10^-4;
columnLabel = "";
textCoordinates =
  {{0.09 * months, 0.1}, {0.865 * months, 0.9}, {0.09 * months, 0.35}, {0.09 * months, 0.6}};
g5 = Show[display[annotation, displayNumber, xplotlabel, xlabel,
  ylabel, medianTicks, highlight, columnLabel], ImageSize → 250];

```

```

displayNumber = 4;
annotation = "Probelet_Xq/Tumor_Stage";
firstAnnotation = "Low/III,IV";
secondAnnotation = "High/I,II";
thirdAnnotation = "High/III,IV";
fourthAnnotation = "Low/I,II";
highlight = True;
xplotlabel = "(f)";
xlabel = False;
ylabel = "False";
medianTicks = Table["", {a, 1, 8}];
hazardRatio = "blank";
pValue = 8.3 * 10^-4;
columnLabel = "";
textCoordinates =
  {{0.09 * months, 0.1}, {0.865 * months, 0.9}, {0.09 * months, 0.35}, {0.09 * months, 0.6}};
g6 = Show[display[annotation, displayNumber, xplotlabel, xlabel,
  ylabel, medianTicks, highlight, columnLabel], ImageSize -> 250];

stream = path <> "Validation_Patients.txt";
annotations = Import[stream, "Table"];
{patients, annotationsNumber} = Dimensions[annotations] - {1, 1};
annotationNames = Take[annotations, 1, {2, annotationsNumber + 1}][[1]];
annotations = Drop[Import[stream, "Table"], 1, 1];
Clear[stream];

times = Table[
  If[annotationColumn["Days_Death"][[a]] == "Null",
    If[annotationColumn["Days_Followup"][[a]] == "Null",
      "Null",
      annotationColumn["Days_Followup"][[a]] / monthConversion],
    annotationColumn["Days_Death"][[a]] / monthConversion],
  {a, 1, patients}];
status = Table[If[annotationColumn["Days_Death"][[a]] == "Null",
  If[annotationColumn["Days_Followup"][[a]] == "Null", 2, 0], 1],
  {a, 1, patients}];
positionNull = Position[status, 2];
Do[{
  annotations = Drop[annotations, positionNull[[a]]],
  times = Drop[times, positionNull[[a]]],
  status = Drop[status, positionNull[[a]]],
  {a, Dimensions[positionNull][[1]], 1, -1}
patients = patients - Dimensions[positionNull][[1]];

displayNumber = 2;
annotation = "Arraylet_6p+12p_(Corr.)";
firstAnnotation = "High";
secondAnnotation = "Low";
highlight = True;
xplotlabel = "(g)";
xlabel = True;
ylabel = "from the Validation Set";
medianTicks = Table["", {a, 1, 8}];
hazardRatio = "= 1.9";
columnLabel = "";
textCoordinates = {{0.09 * months, 0.1}, {0.865 * months, 0.9}};
g7 = Show[display[annotation, displayNumber, xplotlabel,
  xlabel, ylabel, medianTicks, highlight, columnLabel], ImageSize -> 250];

```

```

displayNumber = 2;
annotation = "Arraylet_7p_(Corr.)";
firstAnnotation = "Low";
secondAnnotation = "High";
highlight = True;
xplotlabel = "(h)";
xlabel = True;
ylabel = "False";
medianTicks = Table["", {a, 1, 8}];
hazardRatio = "=1.7";
columnLabel = "";
textCoordinates = {{0.09 * months, 0.1}, {0.865 * months, 0.9}};
g8 = Show[display[annotation, displayNumber, xplotlabel,
  xlabel, ylabel, medianTicks, highlight, columnLabel], ImageSize → 250];

displayNumber = 2;
annotation = "Arraylet_Xq_(Corr.)";
firstAnnotation = "Low";
secondAnnotation = "High";
highlight = True;
xplotlabel = "(i)";
xlabel = True;
ylabel = "False";
medianTicks = Table["", {a, 1, 8}];
hazardRatio = "=1.9";
columnLabel = "";
textCoordinates = {{0.09 * months, 0.1}, {0.865 * months, 0.9}};
g9 = Show[display[annotation, displayNumber, xplotlabel,
  xlabel, ylabel, medianTicks, highlight, columnLabel], ImageSize → 250];

fig3 =
  GraphicsGrid[{{g1, g2, g3}, {g4, g5, g6}, {g7, g8, g9}}, ImageSize → 750, Spacings → {-67, -12}]

```



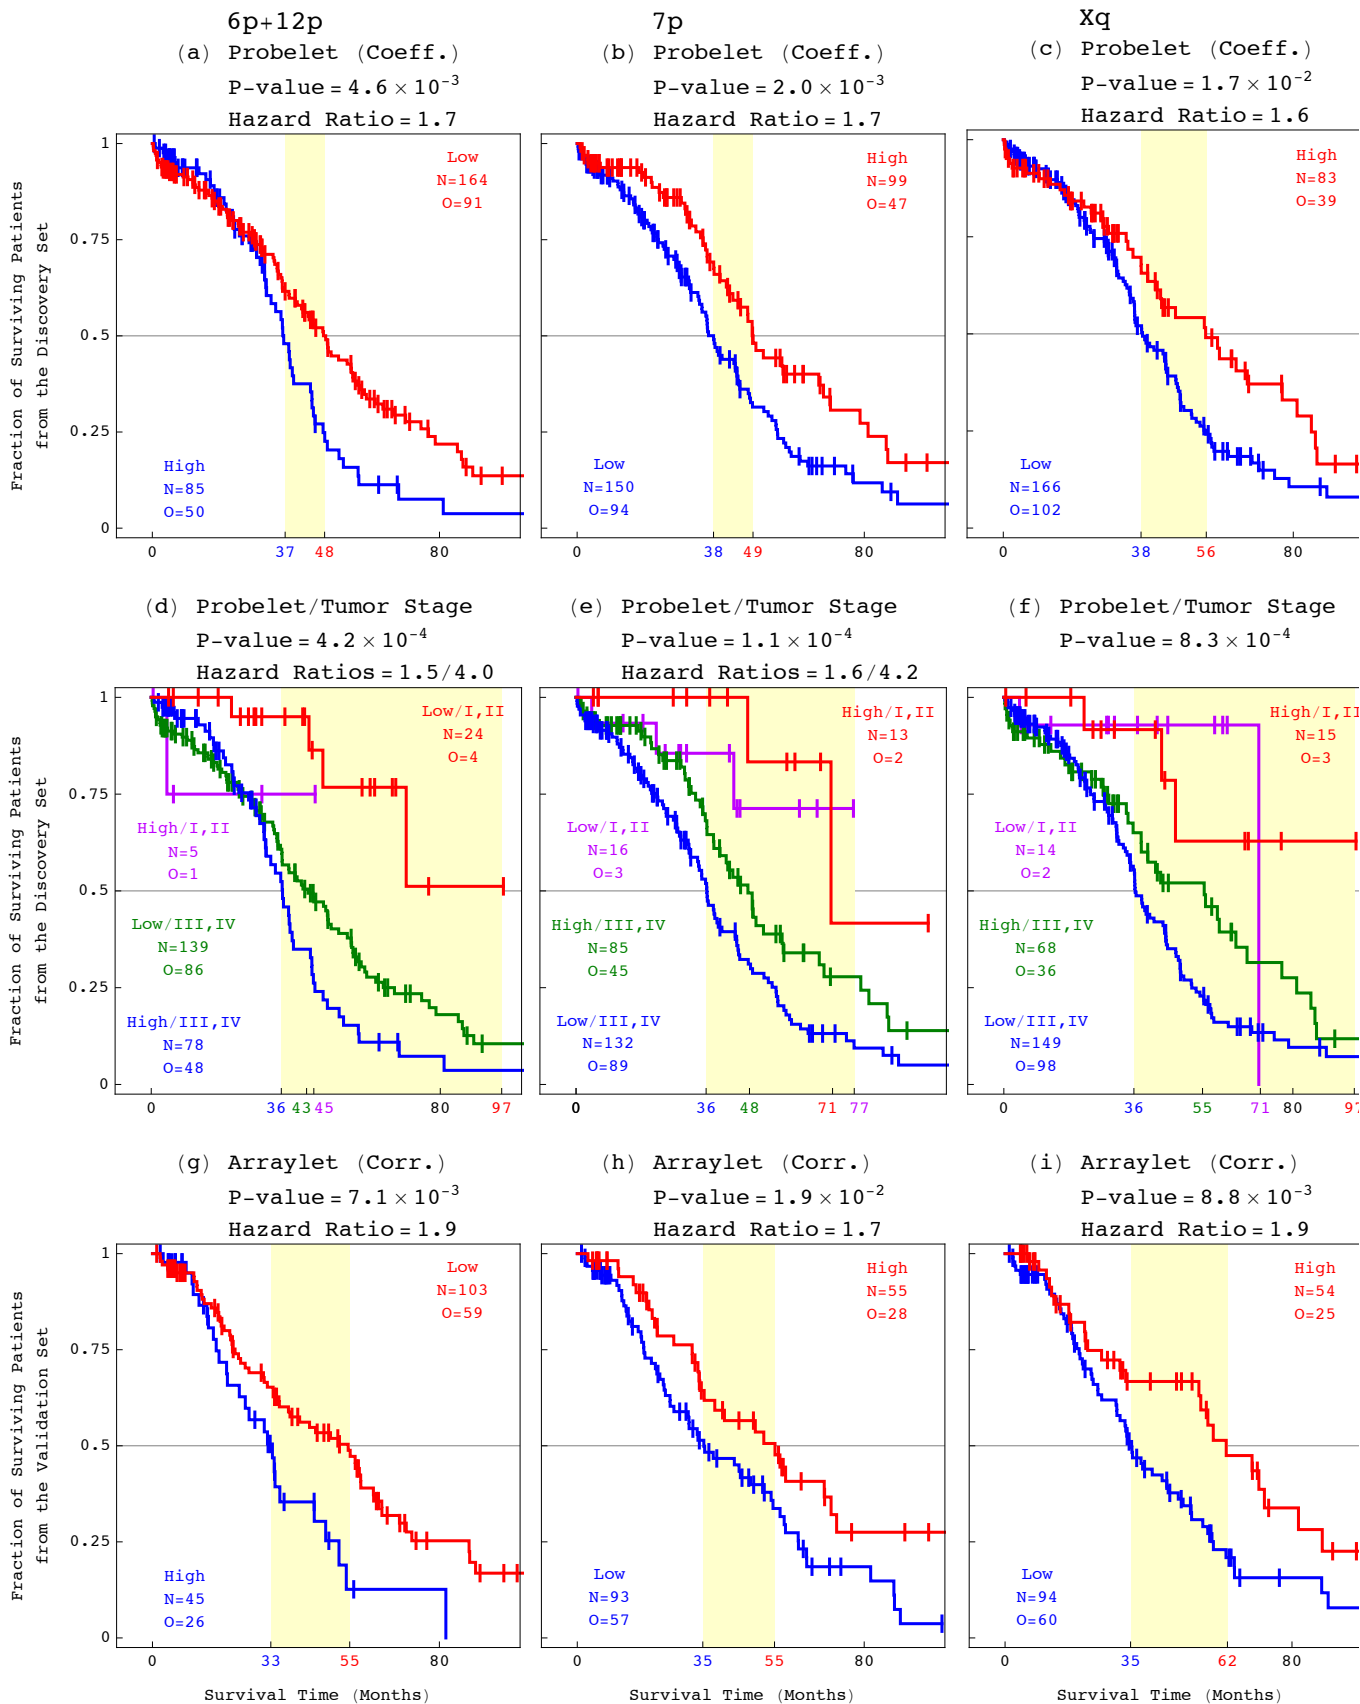

Export [path <> "Figure\_3.pdf", fig3, "PDF", ImageSize → 750, ImageResolution → resolution];

```
(* Display the Survival Analyses of the Discovery Set Classified by the Standard Indicators *)
```

```
title = "Fraction of Surviving Patients";

stream = path <> "Discovery_Patients.txt";
annotations = Import[stream, "Table"];
{patients, annotationsNumber} = Dimensions[annotations] - {1, 1};
annotationNames = Take[annotations, 1, {2, annotationsNumber + 1}][[1]];
annotations = Drop[Import[stream, "Table"], 1, 1];
Clear[stream];

times = Table[
  If[annotationColumn["Days_Death"][[a]] == "Null",
    If[annotationColumn["Days_Followup"][[a]] == "Null",
      "Null",
      annotationColumn["Days_Followup"][[a]] / monthConversion],
    annotationColumn["Days_Death"][[a]] / monthConversion],
  {a, 1, patients}];
status = Table[If[annotationColumn["Days_Death"][[a]] == "Null",
  If[annotationColumn["Days_Followup"][[a]] == "Null", 2, 0], 1],
  {a, 1, patients}];
positionNull = Position[status, 2];
Do[{
  annotations = Drop[annotations, positionNull[[a]]],
  times = Drop[times, positionNull[[a]]],
  status = Drop[status, positionNull[[a]]],
  {a, Dimensions[positionNull][[1]], 1, -1}}
patients = patients - Dimensions[positionNull][[1]];

displayNumber = 2;
annotation = "Tumor_Stage";
firstAnnotation = "III,IV";
secondAnnotation = "I,II";
highlight = True;
xplotlabel = "(a)";
xlabel = False;
ylabel = "from the Discovery Set";
medianTicks = Table["", {a, 1, 8}];
hazardRatio = "= 4.4";
columnLabel = "";
textCoordinates = {{0.09 * months, 0.1}, {0.865 * months, 0.9}};
g1 = Show[display[annotation, displayNumber, xplotlabel,
  xlabel, ylabel, medianTicks, highlight, columnLabel], ImageSize -> 250];

displayNumber = 2;
annotation = "Residual_Disease";
firstAnnotation = "Yes";
secondAnnotation = "No";
highlight = True;
xplotlabel = "(b)";
xlabel = False;
ylabel = "False";
medianTicks = Table["", {a, 1, 8}];
hazardRatio = "= 2.3";
columnLabel = "";
textCoordinates = {{0.09 * months, 0.1}, {0.865 * months, 0.9}};
g2 = Show[display[annotation, displayNumber, xplotlabel,
  xlabel, ylabel, medianTicks, highlight, columnLabel], ImageSize -> 250];
```

```

displayNumber = 2;
annotation = "Therapy_Outcome";
firstAnnotation = "No";
secondAnnotation = "CR";
highlight = True;
xplotlabel = "(c)";
xlabel = True;
ylabel = "from the Discovery Set";
medianTicks = Table["", {a, 1, 8}];
hazardRatio = "= 3.8";
columnLabel = "";
textCoordinates = {{0.09 * months, 0.1}, {0.865 * months, 0.9}};
g3 = Show[display[annotation, displayNumber, xplotlabel,
  xlabel, ylabel, medianTicks, highlight, columnLabel], ImageSize -> 250];

displayNumber = 2;
annotation = "NeoplasM_Status";
firstAnnotation = "W";
secondAnnotation = "WO";
highlight = True;
xplotlabel = "(d)";
xlabel = True;
ylabel = "False";
medianTicks = Table["", {a, 1, 8}];
hazardRatio = "= 13.1";
columnLabel = "";
textCoordinates = {{0.09 * months, 0.1}, {0.865 * months, 0.9}};
textCoordinates[[2]] = {0.865 * months, 0.65};
g4 = Show[display[annotation, displayNumber, xplotlabel,
  xlabel, ylabel, medianTicks, highlight, columnLabel], ImageSize -> 250];

```

```
figD = GraphicsGrid[{{g1, g2}, {g3, g4}}, ImageSize -> 500, Spacings -> {-70, -12}]
```

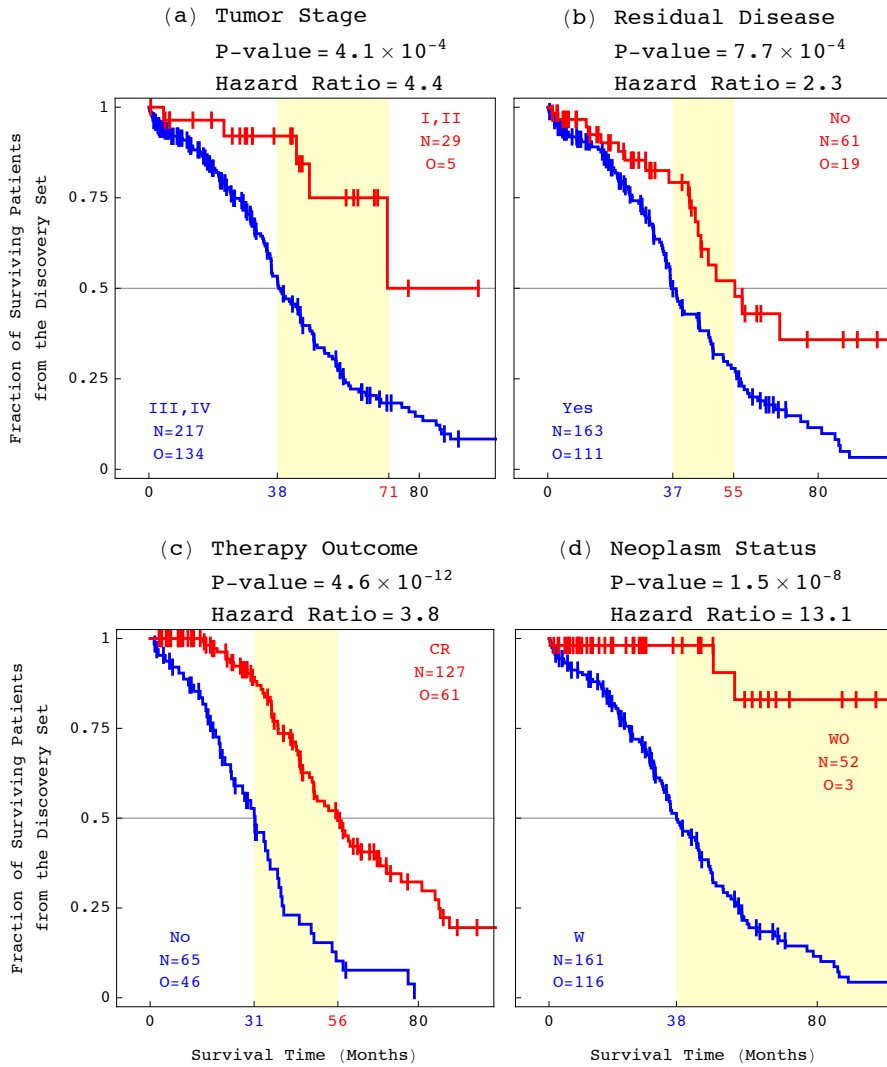

```
Export[path <> "Figure_D.pdf", figD, "PDF", ImageSize -> 500, ImageResolution -> resolution];
```

```
(* Display the Survival Analyses of the Validation Set Classified by the Standard Indicators *)
```

```
stream = path <> "Validation_Patients.txt";
annotations = Import[stream, "Table"];
{patients, annotationsNumber} = Dimensions[annotations] - {1, 1};
annotationNames = Take[annotations, 1, {2, annotationsNumber + 1}][[1]];
annotations = Drop[Import[stream, "Table"], 1, 1];
Clear[stream];

times = Table[
  If[annotationColumn["Days_Death"][[a]] == "Null",
    If[annotationColumn["Days_Followup"][[a]] == "Null",
      "Null",
      annotationColumn["Days_Followup"][[a]] / monthConversion,
      annotationColumn["Days_Death"][[a]] / monthConversion,
      {a, 1, patients}];
status = Table[If[annotationColumn["Days_Death"][[a]] == "Null",
  If[annotationColumn["Days_Followup"][[a]] == "Null", 2, 0], 1],
  {a, 1, patients}];
positionNull = Position[status, 2];
Do[{
  annotations = Drop[annotations, positionNull[[a]]],
  times = Drop[times, positionNull[[a]]],
  status = Drop[status, positionNull[[a]]],
  {a, Dimensions[positionNull][[1]], 1, -1}
patients = patients - Dimensions[positionNull][[1]];

displayNumber = 2;
annotation = "Tumor_Stage";
firstAnnotation = "IV";
secondAnnotation = "III";
highlight = True;
xplotlabel = "(a)";
xlabel = False;
ylabel = "from the Validation Set";
medianTicks = Table["", {a, 1, 8}];
hazardRatio = "= 1.8";
columnLabel = "";
textCoordinates = {{0.09 * months, 0.1}, {0.865 * months, 0.9}};
g1 = Show[display[annotation, displayNumber, xplotlabel,
  xlabel, ylabel, medianTicks, highlight, columnLabel], ImageSize -> 250];

displayNumber = 2;
annotation = "Residual_Disease";
firstAnnotation = "Yes";
secondAnnotation = "No";
highlight = True;
xplotlabel = "(b)";
xlabel = False;
ylabel = "False";
medianTicks = Table["", {a, 1, 8}];
hazardRatio = "= 2.4";
columnLabel = "";
textCoordinates = {{0.09 * months, 0.1}, {0.865 * months, 0.9}};
g2 = Show[display[annotation, displayNumber, xplotlabel,
  xlabel, ylabel, medianTicks, highlight, columnLabel], ImageSize -> 250];
```

```

displayNumber = 2;
annotation = "Therapy_Outcome";
firstAnnotation = "No";
secondAnnotation = "CR";
highlight = True;
xplotlabel = "(c)";
xlabel = True;
ylabel = "from the Validation Set";
medianTicks = Table["", {a, 1, 8}];
hazardRatio = "= 3.8";
columnLabel = "";
textCoordinates = {{0.09 * months, 0.1}, {0.865 * months, 0.9}};
g3 = Show[display[annotation, displayNumber, xplotlabel,
  xlabel, ylabel, medianTicks, highlight, columnLabel], ImageSize -> 250];

displayNumber = 2;
annotation = "NeoplasM_Status";
firstAnnotation = "W";
secondAnnotation = "WO";
highlight = True;
xplotlabel = "(d)";
xlabel = True;
ylabel = "False";
medianTicks = Table["", {a, 1, 8}];
hazardRatio = "= 16.7";
columnLabel = "";
textCoordinates = {{0.09 * months, 0.1}, {0.865 * months, 0.9}};
textCoordinates[[2]] = {0.865 * months, 0.65};
g4 = Show[display[annotation, displayNumber, xplotlabel,
  xlabel, ylabel, medianTicks, highlight, columnLabel], ImageSize -> 250];

```

**figE = GraphicsGrid[{{g1, g2}}, {g3, g4}], ImageSize → 500, Spacings → {-70, -12}]**

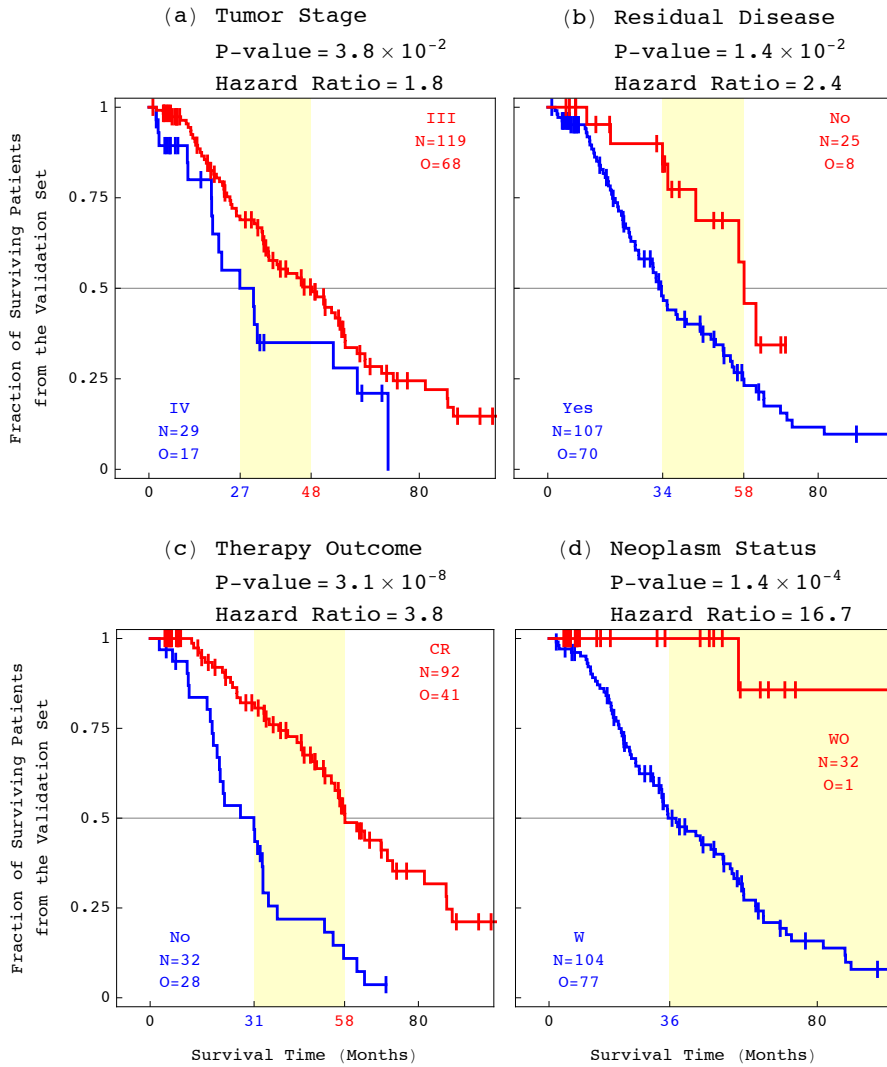

**Export[path <> "Figure\_E.pdf", figE, "PDF", ImageSize → 500, ImageResolution → resolution];**

```
(* Display the Survival Analyses of the Discovery and Validation Platinum-Based Chemotherapy Patients Classified by the Tensor GSVD and Tumor Stage *)
```

```
title = "Fraction of Surviving Platinum-Based";

stream = path <> "Discovery_Patients.txt";
annotations = Import[stream, "Table"];
{patients, annotationsNumber} = Dimensions[annotations] - {1, 1};
annotationNames = Take[annotations, 1, {2, annotationsNumber + 1}][[1]];
annotations = Drop[Import[stream, "Table"], 1, 1];
Clear[stream];

times = Table[
  If[annotationColumn["Days_Death"][[a]] == "Null",
    If[annotationColumn["Days_Followup"][[a]] == "Null",
      "Null",
      annotationColumn["Days_Followup"][[a]] / monthConversion],
    annotationColumn["Days_Death"][[a]] / monthConversion],
  {a, 1, patients}];
status = Table[
  If[annotationColumn["Platinum-Based_Chemotherapy"][[a]] == "Null", 2,
    If[annotationColumn["Platinum-Based_Chemotherapy"][[a]] == "No", 2,
      If[annotationColumn["Days_Death"][[a]] == "Null",
        If[annotationColumn["Days_Followup"][[a]] == "Null", 2, 0], 1]],
  {a, 1, patients}];
positionNull = Position[status, 2];
Do[{
  annotations = Drop[annotations, positionNull[[a]]],
  times = Drop[times, positionNull[[a]]],
  status = Drop[status, positionNull[[a]]]},
  {a, Dimensions[positionNull][[1]], 1, -1}]
patients = patients - Dimensions[positionNull][[1]];

displayNumber = 2;
annotation = "Probelet_6p+12p_(Coeff.)";
firstAnnotation = "High";
secondAnnotation = "Low";
highlight = True;
xplotlabel = "(a)";
xlabel = False;
ylabel = "Chemo. Patients from the Discovery Set";
medianTicks = Table["", {a, 1, 8}];
hazardRatio = "= 2.0";
columnLabel = "6p+12p";
textCoordinates = {{0.09 * months, 0.1}, {0.865 * months, 0.9}};
g1 = Show[display[annotation, displayNumber, xplotlabel,
  xlabel, ylabel, medianTicks, highlight, columnLabel], ImageSize -> 250];
```



```

displayNumber = 2;
annotation = "Probelet_7p_(Coeff.)";
firstAnnotation = "Low";
secondAnnotation = "High";
highlight = True;
xplotlabel = "(b)";
xlabel = False;
ylabel = "False";
medianTicks = Table["", {a, 1, 8}];
medianTicks[[2]] = " ";
medianTicks[[3]] = " ";
hazardRatio = "= 1.5";
columnLabel = "7p";
textCoordinates = {{0.09 * months, 0.1}, {0.865 * months, 0.9}};
g2 = Show[display[annotation, displayNumber, xplotlabel,
  xlabel, ylabel, medianTicks, highlight, columnLabel], ImageSize → 250];

displayNumber = 2;
annotation = "Probelet_Xq_(Coeff.)";
firstAnnotation = "Low";
secondAnnotation = "High";
highlight = True;
xplotlabel = "(c)";
xlabel = False;
ylabel = "False";
medianTicks = Table["", {a, 1, 8}];
hazardRatio = "= 1.6";
columnLabel = "Xq";
textCoordinates = {{0.09 * months, 0.1}, {0.865 * months, 0.9}};
g3 = Show[display[annotation, displayNumber, xplotlabel,
  xlabel, ylabel, medianTicks, highlight, columnLabel], ImageSize → 250];

displayNumber = 4;
annotation = "Probelet_6p+12p/Tumor_Stage";
firstAnnotation = "High/III,IV";
secondAnnotation = "Low/I,II";
thirdAnnotation = "Low/III,IV";
fourthAnnotation = "High/I,II";
highlight = True;
xplotlabel = "(d)";
xlabel = False;
ylabel = "Chemo. Patients from the Discovery Set";
medianTicks = Table["", {a, 1, 8}];
medianTicks[[2]] = " ";
medianTicks[[8]] = " ";
medianTicks[[5]] = " ";
hazardRatio = "s = 1.8/4.1";
pValue = 4.8 * 10^-5;
columnLabel = "";
textCoordinates =
  {{0.09 * months, 0.1}, {0.865 * months, 0.9}, {0.09 * months, 0.35}, {0.09 * months, 0.6}};
g4 = Show[display[annotation, displayNumber, xplotlabel, xlabel,
  ylabel, medianTicks, highlight, columnLabel], ImageSize → 250];

```

```

displayNumber = 4;
annotation = "Probelet_7p/Tumor_Stage";
firstAnnotation = "Low/III,IV";
secondAnnotation = "High/I,II";
thirdAnnotation = "High/III,IV";
fourthAnnotation = "Low/I,II";
highlight = True;
xplotlabel = "(e)";
xlabel = False;
ylabel = "False";
medianTicks = Table["", {a, 1, 8}];
medianTicks[[7]] = " ";
medianTicks[[4]] = " ";
hazardRatio = "blank";
pValue = 1.6 * 10^-3;
columnLabel = "";
textCoordinates =
  {{0.09 * months, 0.1}, {0.865 * months, 0.9}, {0.09 * months, 0.35}, {0.09 * months, 0.6}};
g5 = Show[display[annotation, displayNumber, xplotlabel, xlabel,
  ylabel, medianTicks, highlight, columnLabel], ImageSize -> 250];

displayNumber = 4;
annotation = "Probelet_Xq/Tumor_Stage";
firstAnnotation = "Low/III,IV";
secondAnnotation = "High/I,II";
thirdAnnotation = "High/III,IV";
fourthAnnotation = "Low/I,II";
highlight = True;
xplotlabel = "(f)";
xlabel = False;
ylabel = "False";
medianTicks = Table["", {a, 1, 8}];
hazardRatio = "blank";
pValue = 9.0 * 10^-4;
columnLabel = "";
textCoordinates =
  {{0.09 * months, 0.1}, {0.865 * months, 0.9}, {0.09 * months, 0.35}, {0.09 * months, 0.6}};
g6 = Show[display[annotation, displayNumber, xplotlabel, xlabel,
  ylabel, medianTicks, highlight, columnLabel], ImageSize -> 250];

stream = path <> "Validation_Patients.txt";
annotations = Import[stream, "Table"];
{patients, annotationsNumber} = Dimensions[annotations] - {1, 1};
annotationNames = Take[annotations, 1, {2, annotationsNumber + 1}][[1]];
annotations = Drop[Import[stream, "Table"], 1, 1];
Clear[stream];

```

```

times = Table[
  If[annotationColumn["Days_Death"][[a]] == "Null",
    If[annotationColumn["Days_Followup"][[a]] == "Null",
      "Null",
      annotationColumn["Days_Followup"][[a]] / monthConversion],
    annotationColumn["Days_Death"][[a]] / monthConversion],
  {a, 1, patients}];
status = Table[
  If[annotationColumn["Platinum-Based_Chemotherapy"][[a]] == "Null", 2,
    If[annotationColumn["Platinum-Based_Chemotherapy"][[a]] == "No", 2,
      If[annotationColumn["Days_Death"][[a]] == "Null",
        If[annotationColumn["Days_Followup"][[a]] == "Null", 2, 0], 1]]],
  {a, 1, patients}];
positionNull = Position[status, 2];
Do[{
  annotations = Drop[annotations, positionNull[[a]]],
  times = Drop[times, positionNull[[a]]],
  status = Drop[status, positionNull[[a]]]},
  {a, Dimensions[positionNull][[1]], 1, -1}]
patients = patients - Dimensions[positionNull][[1]];

displayNumber = 2;
annotation = "Arraylet_6p+12p_(Corr.)";
firstAnnotation = "High";
secondAnnotation = "Low";
highlight = True;
xplotlabel = "(g)";
xlabel = True;
ylabel = "Chemo. Patients from the Validation Set";
medianTicks = Table["", {a, 1, 8}];
hazardRatio = "= 1.8";
columnLabel = "";
textCoordinates = {{0.09 * months, 0.1}, {0.865 * months, 0.9}};
g7 = Show[display[annotation, displayNumber, xplotlabel,
  xlabel, ylabel, medianTicks, highlight, columnLabel], ImageSize → 250];

displayNumber = 2;
annotation = "Arraylet_7p_(Corr.)";
firstAnnotation = "Low";
secondAnnotation = "High";
highlight = True;
xplotlabel = "(h)";
xlabel = True;
ylabel = "False";
medianTicks = Table["", {a, 1, 8}];
hazardRatio = "= 1.7";
columnLabel = "";
textCoordinates = {{0.09 * months, 0.1}, {0.865 * months, 0.9}};
g8 = Show[display[annotation, displayNumber, xplotlabel,
  xlabel, ylabel, medianTicks, highlight, columnLabel], ImageSize → 250];

```

```

displayNumber = 2;
annotation = "Arraylet_Xq_(Corr.)";
firstAnnotation = "Low";
secondAnnotation = "High";
highlight = True;
xplotlabel = "(i)";
xlabel = True;
ylabel = "False";
medianTicks = Table["", {a, 1, 8}];
hazardRatio = "= 2.1";
columnLabel = "";
textCoordinates = {{0.09 * months, 0.1}, {0.865 * months, 0.9}};
g9 = Show[display[annotation, displayNumber, xplotlabel,
  xlabel, ylabel, medianTicks, highlight, columnLabel], ImageSize → 250];

figF =
GraphicsGrid[{{g1, g2, g3}, {g4, g5, g6}, {g7, g8, g9}}, ImageSize → 750, Spacings → {-67, -12}]

```

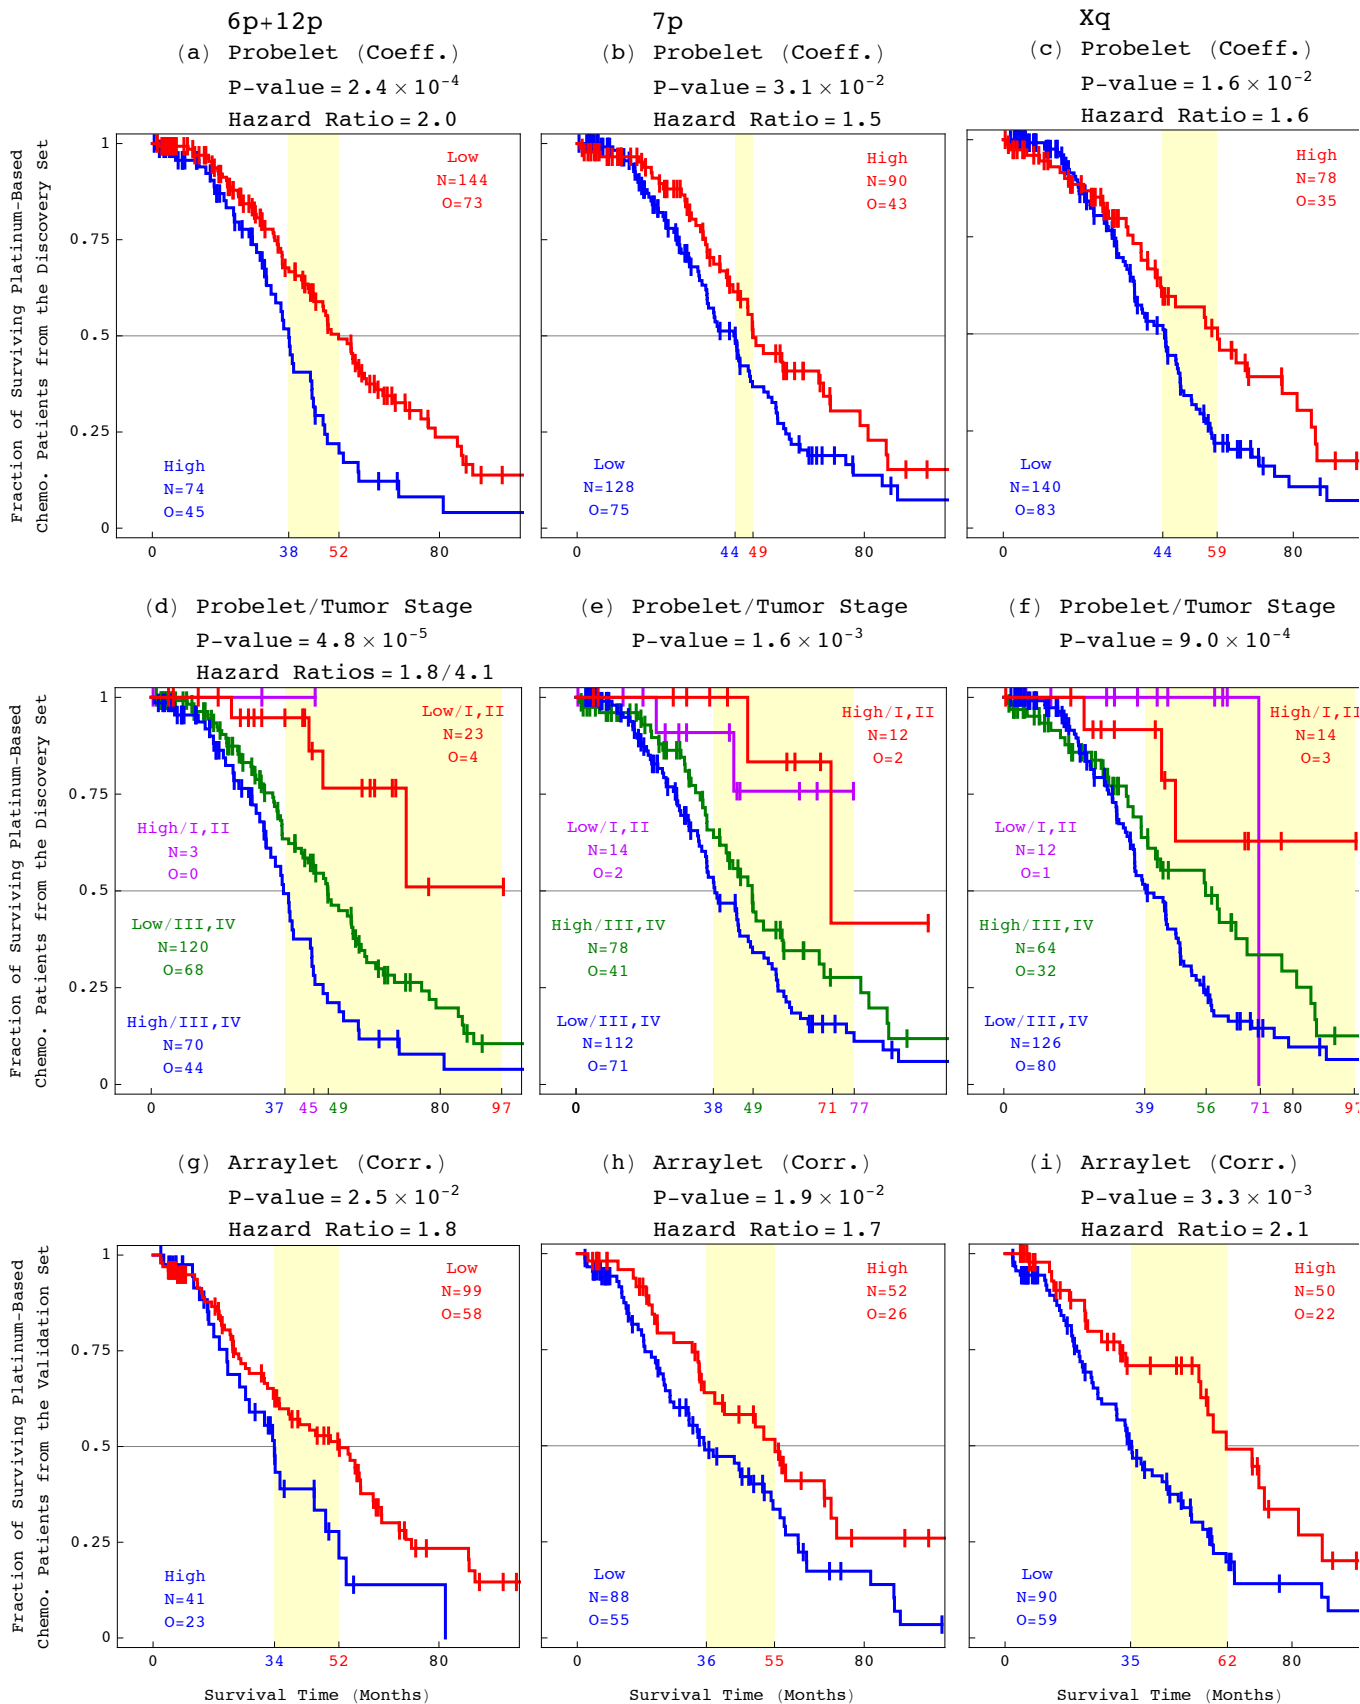

Export[path <> "Figure\_F.pdf", figF, "PDF", ImageSize -> 750, ImageResolution -> resolution];

```
(* Display the Survival Analyses of the Validation Set Classified by the Tensor GSVD and Stage *)
```

```
stream = path <> "Validation_Patients.txt";
annotations = Import[stream, "Table"];
{patients, annotationsNumber} = Dimensions[annotations] - {1, 1};
annotationNames = Take[annotations, 1, {2, annotationsNumber + 1}][[1]];
annotations = Drop[Import[stream, "Table"], 1, 1];
Clear[stream];

times = Table[
  If[annotationColumn["Days_Death"][[a]] == "Null",
    If[annotationColumn["Days_Followup"][[a]] == "Null",
      "Null",
      annotationColumn["Days_Followup"][[a]] / monthConversion],
    annotationColumn["Days_Death"][[a]] / monthConversion],
  {a, 1, patients}];
status = Table[If[annotationColumn["Days_Death"][[a]] == "Null",
  If[annotationColumn["Days_Followup"][[a]] == "Null", 2, 0], 1],
  {a, 1, patients}];
positionNull = Position[status, 2];
Do[{
  annotations = Drop[annotations, positionNull[[a]]],
  times = Drop[times, positionNull[[a]]],
  status = Drop[status, positionNull[[a]]],
  {a, Dimensions[positionNull][[1]], 1, -1}}
patients = patients - Dimensions[positionNull][[1]];

displayNumber = 4;
annotation = "Arraylet_6p+12p/Tumor_Stage";
firstAnnotation = "High/IV";
secondAnnotation = "Low/III";
thirdAnnotation = "Low/IV";
fourthAnnotation = "High/III";
highlight = True;
xplotlabel = "(a)";
xlabel = True;
ylabel = "from the Validation Set";
medianTicks = Table["", {a, 1, 8}];
hazardRatio = "s=1.9/1.8";
medianTicks[[7]] = " ";
medianTicks[[6]] = " ";
pValue = 5.4 * 10^-3;
columnLabel = "6p+12p";
textCoordinates =
  {{0.09 * months, 0.1}, {0.865 * months, 0.9}, {0.09 * months, 0.35}, {0.09 * months, 0.6}};
textCoordinates[[1]] = {0.09 * months - 3, 0.1};
textCoordinates[[3]] = {0.09 * months - 3, 0.35};
textCoordinates[[4]] = {0.865 * months, 0.65};
g1 = Show[display[annotation, displayNumber, xplotlabel,
  xlabel, ylabel, medianTicks, highlight, columnLabel], ImageSize -> 250];
```

```

displayNumber = 4;
annotation = "Arraylet_7p/Tumor_Stage";
firstAnnotation = "Low/IV";
secondAnnotation = "High/III";
thirdAnnotation = "High/IV";
fourthAnnotation = "Low/III";
highlight = True;
xplotlabel = "(b)";
xlabel = True;
ylabel = "False";
medianTicks = Table["", {a, 1, 8}];
medianTicks[[7]] = " ";
hazardRatio = "s = 1.8/1.8";
pValue = 1.6 * 10^-2;
columnLabel = "7p";
textCoordinates =
  {{0.09 * months, 0.1}, {0.865 * months, 0.9}, {0.09 * months, 0.35}, {0.09 * months, 0.6}};
textCoordinates[[1]] = {0.09 * months - 3, 0.1};
textCoordinates[[3]] = {0.09 * months - 3, 0.35};
textCoordinates[[4]] = {0.865 * months, 0.65};
g2 = Show[display[annotation, displayNumber, xplotlabel,
  xlabel, ylabel, medianTicks, highlight, columnLabel], ImageSize -> 250];

displayNumber = 4;
annotation = "Arraylet_Xq/Tumor_Stage";
firstAnnotation = "Low/IV";
secondAnnotation = "High/III";
thirdAnnotation = "High/IV";
fourthAnnotation = "Low/III";
highlight = True;
xplotlabel = "(c)";
xlabel = True;
ylabel = "False";
medianTicks = Table["", {a, 1, 8}];
medianTicks[[4]] = " ";
medianTicks[[5]] = " ";
hazardRatio = "s = 2.1/2.1";
pValue = 1.1 * 10^-4;
columnLabel = "Xq";
textCoordinates =
  {{0.09 * months, 0.1}, {0.865 * months, 0.9}, {0.09 * months, 0.35}, {0.09 * months, 0.6}};
textCoordinates = {{0.09 * months - 3, 0.1}, {0.865 * months, 0.65},
  {0.865 * months, 0.9}, {0.09 * months - 3, 0.35}};
g3 = Show[display[annotation, displayNumber, xplotlabel, xlabel,
  ylabel, medianTicks, highlight, columnLabel], ImageSize -> 250];

```

```
figG = GraphicsGrid[{{g1, g2, g3}}, ImageSize -> 750, Spacings -> {-67, -12}]
```

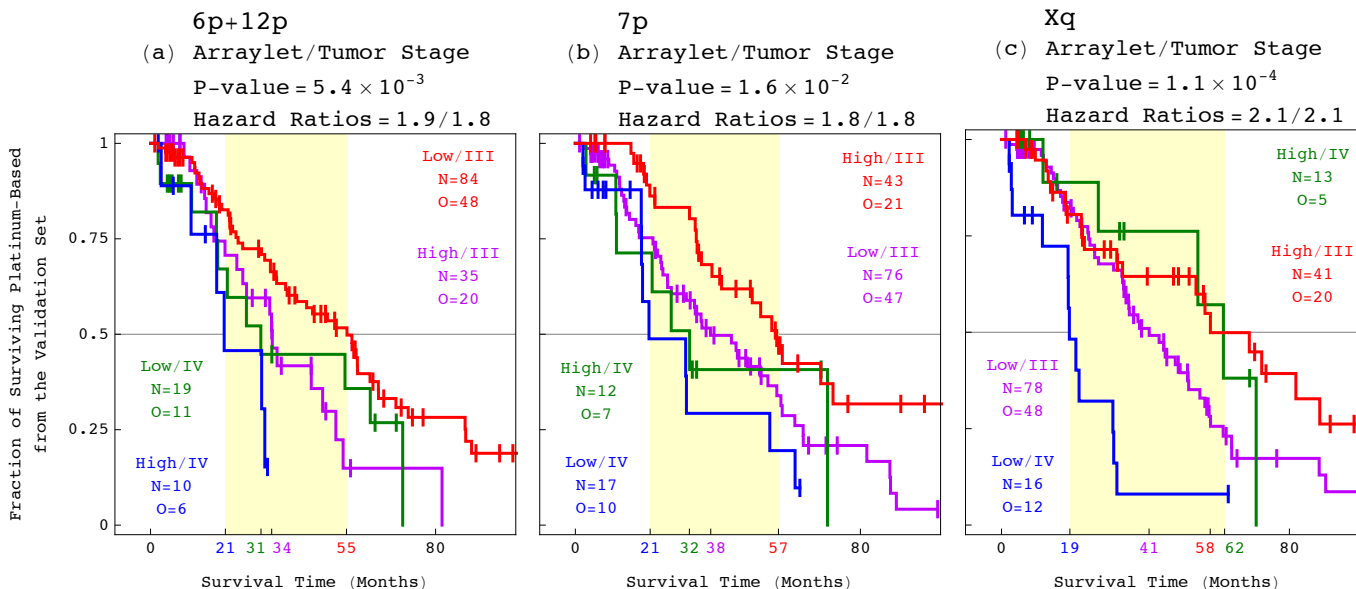

```
Export[path <> "Figure_G.pdf", figG, "PDF", ImageSize -> 750, ImageResolution -> resolution];
```



```

(* Display the Survival Analyses of the Discovery Set Classified by the Tensor GSVD and Standard
Indicators other than Tumor Stage *)

stream = path <> "Discovery_Patients.txt";
annotations = Import[stream, "Table"];
{patients, annotationsNumber} = Dimensions[annotations] - {1, 1};
annotationNames = Take[annotations, 1, {2, annotationsNumber + 1}][[1]];
annotations = Drop[Import[stream, "Table"], 1, 1];
Clear[stream];

times = Table[
  If[annotationColumn["Days_Death"][[a]] == "Null",
    If[annotationColumn["Days_Followup"][[a]] == "Null",
      "Null",
      annotationColumn["Days_Followup"][[a]] / monthConversion],
    annotationColumn["Days_Death"][[a]] / monthConversion],
  {a, 1, patients}];
status = Table[If[annotationColumn["Days_Death"][[a]] == "Null",
  If[annotationColumn["Days_Followup"][[a]] == "Null", 2, 0], 1],
  {a, 1, patients}];
positionNull = Position[status, 2];
Do[{
  annotations = Drop[annotations, positionNull[[a]]],
  times = Drop[times, positionNull[[a]]],
  status = Drop[status, positionNull[[a]]],
  {a, Dimensions[positionNull][[1]], 1, -1}}
patients = patients - Dimensions[positionNull][[1]];

displayNumber = 4;
annotation = "Probelet_6p+12p/Residual_Disease";
firstAnnotation = "High/Yes";
secondAnnotation = "Low/No";
thirdAnnotation = "Low/Yes";
fourthAnnotation = "High/No";
highlight = True;
xplotlabel = "(a)";
xlabel = False;
ylabel = "from the Discovery Set";
medianTicks = Table["", {a, 1, 8}];
medianTicks[[2]] = " ";
medianTicks[[7]] = " ";
medianTicks[[3]] = " ";
hazardRatio = "s = 1.6/2.2";
pValue = 6.6 * 10^-4;
columnLabel = "6p+12p";
textCoordinates =
  {{0.09 * months, 0.1}, {0.865 * months, 0.9}, {0.09 * months, 0.35}, {0.09 * months, 0.6}};
g1 = Show[display[annotation, displayNumber, xplotlabel, xlabel,
  ylabel, medianTicks, highlight, columnLabel], ImageSize -> 250];

```

```

displayNumber = 4;
annotation = "Probelet_7p/Residual_Disease";
firstAnnotation = "Low/Yes";
secondAnnotation = "High/No";
thirdAnnotation = "High/Yes";
fourthAnnotation = "Low/No";
highlight = True;
xplotlabel = "(b)";
xlabel = False;
ylabel = "False";
medianTicks = Table["", {a, 1, 8}];
hazardRatio = "s = 1.5/2.2";
pValue = 1.1 * 10^-3;
columnLabel = "7p";
textCoordinates =
  {{0.09 * months, 0.1}, {0.865 * months, 0.9}, {0.09 * months, 0.35}, {0.09 * months, 0.6}};
g2 = Show[display[annotation, displayNumber, xplotlabel, xlabel,
  ylabel, medianTicks, highlight, columnLabel], ImageSize -> 250];

```

```

displayNumber = 4;
annotation = "Probelet_Xq/Residual_Disease";
firstAnnotation = "Low/Yes";
secondAnnotation = "High/No";
thirdAnnotation = "High/Yes";
fourthAnnotation = "Low/No";
highlight = True;
xplotlabel = "(c)";
xlabel = False;
ylabel = "False";
medianTicks = Table["", {a, 1, 8}];
medianTicks[[2]] = " ";
medianTicks[[7]] = " ";
hazardRatio = "s = 1.7/2.2";
pValue = 4.0 * 10^-4;
columnLabel = "Xq";
textCoordinates =
  {{0.09 * months, 0.1}, {0.865 * months, 0.9}, {0.09 * months, 0.35}, {0.09 * months, 0.6}};
textCoordinates[[4]] = {0.865 * months, 0.35};
g3 = Show[display[annotation, displayNumber, xplotlabel,
  xlabel, ylabel, medianTicks, highlight, columnLabel], ImageSize -> 250];

```

```

displayNumber = 4;
annotation = "Probelet_6p+12p/Therapy_Outcome";
firstAnnotation = "High/No";
secondAnnotation = "Low/CR";
thirdAnnotation = "Low/No";
fourthAnnotation = "High/CR";
highlight = True;
xplotlabel = "(d)";
xlabel = False;
ylabel = "from the Discovery Set";
medianTicks = Table["", {a, 1, 8}];
medianTicks[[1]] = " ";
medianTicks[[6]] = " ";
hazardRatio = "s = 1.6/3.6";
pValue = 8.1 * 10^-12;
columnLabel = "";
textCoordinates =
  {{0.09 * months, 0.1}, {0.865 * months, 0.9}, {0.09 * months, 0.35}, {0.09 * months, 0.6}};
textCoordinates[[1]] = {0.09 * months, 0.35};
textCoordinates[[3]] = {0.09 * months, 0.1};
textCoordinates[[4]] = {0.865 * months, 0.65};
g4 = Show[display[annotation, displayNumber, xplotlabel,
  xlabel, ylabel, medianTicks, highlight, columnLabel], ImageSize -> 250];

```

```

displayNumber = 4;
annotation = "Probelet_7p/Therapy_Outcome";
firstAnnotation = "Low/No";
secondAnnotation = "High/CR";
thirdAnnotation = "High/No";
fourthAnnotation = "Low/CR";
highlight = True;
xplotlabel = "(e)";
xlabel = False;
ylabel = "False";
medianTicks = Table["", {a, 1, 8}];
medianTicks[[2]] = " ";
medianTicks[[5]] = " ";
hazardRatio = "s = 1.6/3.5";
pValue = 3.9 * 10^-12;
columnLabel = "";
textCoordinates =
  {{0.09 * months, 0.1}, {0.865 * months, 0.9}, {0.09 * months, 0.35}, {0.09 * months, 0.6}};
textCoordinates[[4]] = {0.865 * months, 0.65};
g5 = Show[display[annotation, displayNumber, xplotlabel,
  xlabel, ylabel, medianTicks, highlight, columnLabel], ImageSize -> 250];

```

```

displayNumber = 4;
annotation = "Probelet_Xq/Therapy_Outcome";
firstAnnotation = "Low/No";
secondAnnotation = "High/CR";
thirdAnnotation = "High/No";
fourthAnnotation = "Low/CR";
highlight = True;
xplotlabel = "(f)";
xlabel = False;
ylabel = "False";
medianTicks = Table["", {a, 1, 8}];
medianTicks[[2]] = " ";
medianTicks[[3]] = " ";
hazardRatio = "s = 1.6/3.8";
pValue = 1.8 * 10^-11;
columnLabel = "";
textCoordinates =
  {{0.09 * months, 0.1}, {0.865 * months, 0.9}, {0.09 * months, 0.35}, {0.09 * months, 0.6}};
g6 = Show[display[annotation, displayNumber, xplotlabel, xlabel,
  ylabel, medianTicks, highlight, columnLabel], ImageSize -> 250];

```

```

displayNumber = 4;
annotation = "Probelet_6p+12p/Neoplasms_Status";
firstAnnotation = "High/W";
secondAnnotation = "Low/WO";
thirdAnnotation = "Low/W";
fourthAnnotation = "High/WO";
highlight = True;
xplotlabel = "(g)";
xlabel = True;
ylabel = "from the Discovery Set";
medianTicks = Table["", {a, 1, 8}];
hazardRatio = "s = 1.5/12.1";
pValue = 2.2 * 10^-8;
columnLabel = "";
textCoordinates =
  {{0.09 * months, 0.1}, {0.865 * months, 0.9}, {0.09 * months, 0.35}, {0.09 * months, 0.6}};
textCoordinates[[2]] = {0.865 * months, 0.6};
textCoordinates[[4]] = {0.865 * months, 0.35};
g7 = Show[display[annotation, displayNumber, xplotlabel,
  xlabel, ylabel, medianTicks, highlight, columnLabel], ImageSize -> 250];

```

```

displayNumber = 4;
annotation = "Probelet_7p/NeoplasM_Status";
firstAnnotation = "Low/W";
secondAnnotation = "High/WO";
thirdAnnotation = "High/W";
fourthAnnotation = "Low/WO";
highlight = True;
xplotlabel = "(h)";
xlabel = True;
ylabel = "False";
medianTicks = Table["", {a, 1, 8}];
hazardRatio = "s = 1.7/12.3";
pValue = 6.1 * 10^-9;
columnLabel = "";
textCoordinates =
  {{0.09 * months, 0.1}, {0.865 * months, 0.9}, {0.09 * months, 0.35}, {0.09 * months, 0.6}};
textCoordinates[[2]] = {0.865 * months, 0.6};
textCoordinates[[4]] = {0.865 * months, 0.35};
g8 = Show[display[annotation, displayNumber, xplotlabel,
  xlabel, ylabel, medianTicks, highlight, columnLabel], ImageSize -> 250];

displayNumber = 4;
annotation = "Probelet_Xq/NeoplasM_Status";
firstAnnotation = "Low/W";
secondAnnotation = "High/WO";
thirdAnnotation = "High/W";
fourthAnnotation = "Low/WO";
highlight = True;
xplotlabel = "(i)";
xlabel = True;
ylabel = "False";
medianTicks = Table["", {a, 1, 8}];
hazardRatio = "s = 1.7/13.9";
pValue = 2.1 * 10^-8;
columnLabel = "";
textCoordinates =
  {{0.09 * months, 0.1}, {0.865 * months, 0.9}, {0.09 * months, 0.35}, {0.09 * months, 0.6}};
textCoordinates[[2]] = {0.865 * months, 0.6};
textCoordinates[[4]] = {0.865 * months, 0.35};
g9 = Show[display[annotation, displayNumber, xplotlabel,
  xlabel, ylabel, medianTicks, highlight, columnLabel], ImageSize -> 250];

figH =
  GraphicsGrid[{{g1, g2, g3}, {g4, g5, g6}, {g7, g8, g9}}, ImageSize -> 750, Spacings -> {-67, -12}]

```

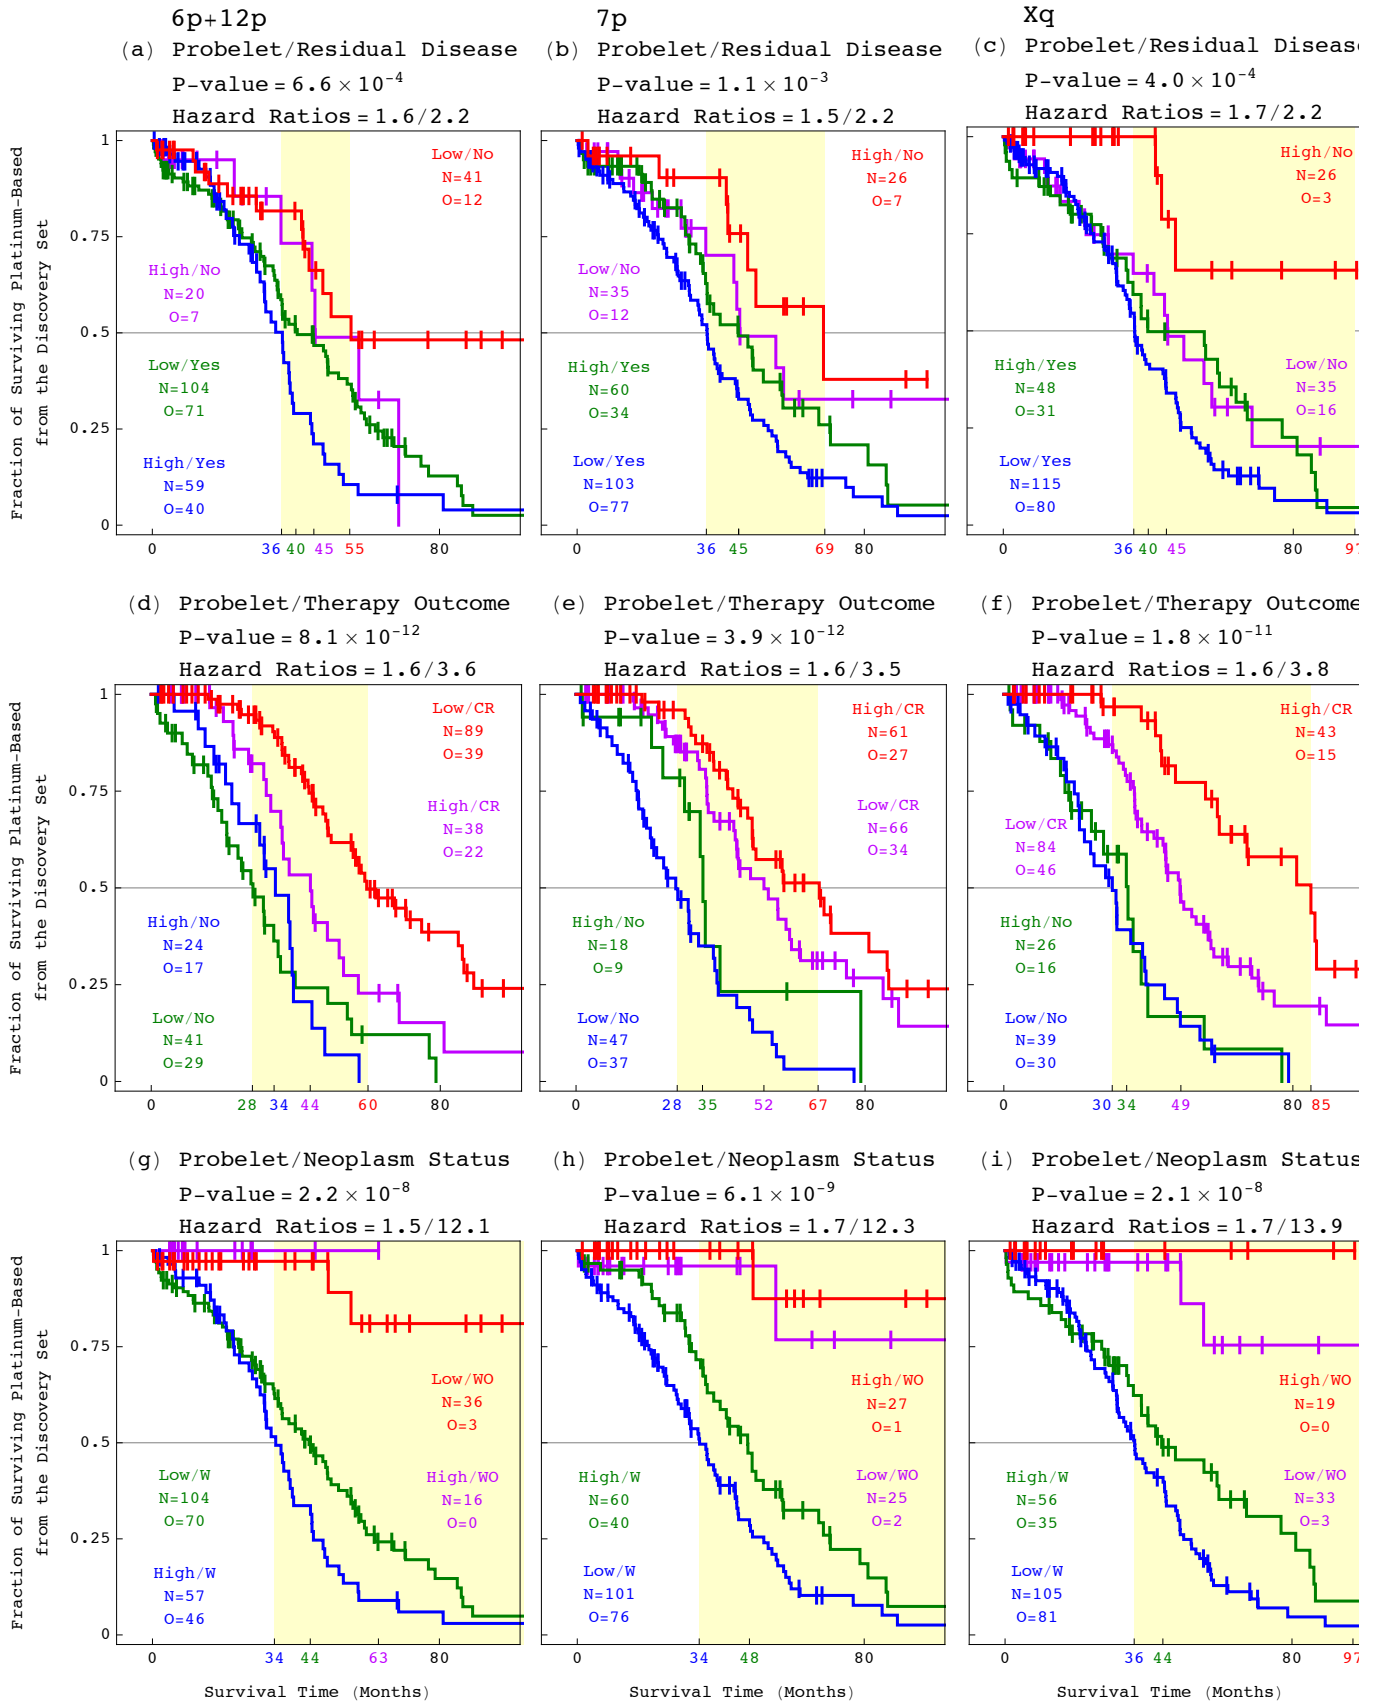

Export[path <> "Figure\_H.pdf", figH, "PDF", ImageSize -> 750, ImageResolution -> resolution];

```

(* Display the Survival Analyses of the Validation Set Classified by the Tensor GSVD and Standard
Indicators other than Tumor Stage *)

stream = path <> "Validation_Patients.txt";
annotations = Import[stream, "Table"];
{patients, annotationsNumber} = Dimensions[annotations] - {1, 1};
annotationNames = Take[annotations, 1, {2, annotationsNumber + 1}][[1]];
annotations = Drop[Import[stream, "Table"], 1, 1];
Clear[stream];

times = Table[
  If[annotationColumn["Days_Death"][[a]] == "Null",
    If[annotationColumn["Days_Followup"][[a]] == "Null",
      "Null",
      annotationColumn["Days_Followup"][[a]] / monthConversion],
    annotationColumn["Days_Death"][[a]] / monthConversion],
  {a, 1, patients}];
status = Table[If[annotationColumn["Days_Death"][[a]] == "Null",
  If[annotationColumn["Days_Followup"][[a]] == "Null", 2, 0], 1],
  {a, 1, patients}];
positionNull = Position[status, 2];
Do[{
  annotations = Drop[annotations, positionNull[[a]]],
  times = Drop[times, positionNull[[a]]],
  status = Drop[status, positionNull[[a]]],
  {a, Dimensions[positionNull][[1]], 1, -1}}
patients = patients - Dimensions[positionNull][[1]];

displayNumber = 4;
annotation = "Arraylet_6p+12p/Residual_Disease";
firstAnnotation = "High/Yes";
secondAnnotation = "Low/No";
thirdAnnotation = "Low/Yes";
fourthAnnotation = "High/No";
highlight = True;
xplotlabel = "(a)";
xlabel = False;
ylabel = "from the Validation Set";
medianTicks = Table["", {a, 1, 8}];
medianTicks[[2]] = " ";
medianTicks[[7]] = " ";
hazardRatio = "blank";
pValue = 2.6 * 10^-2;
columnLabel = "6p+12p";
textCoordinates =
  {{0.09 * months, 0.1}, {0.865 * months, 0.9}, {0.09 * months, 0.35}, {0.09 * months, 0.6}};
textCoordinates[[4]] = {0.865 * months, 0.65};
g1 = Show[display[annotation, displayNumber, xplotlabel,
  xlabel, ylabel, medianTicks, highlight, columnLabel], ImageSize -> 250];

```

```

displayNumber = 4;
annotation = "Arraylet_7p/Residual_Disease";
firstAnnotation = "Low/Yes";
secondAnnotation = "High/No";
thirdAnnotation = "High/Yes";
fourthAnnotation = "Low/No";
highlight = True;
xplotlabel = "(b)";
xlabel = False;
ylabel = "False";
medianTicks = Table["", {a, 1, 8}];
medianTicks[[7]] = " ";
hazardRatio = "s = 1.9/2.5";
pValue = 1.2 * 10^-3;
columnLabel = "7p";
textCoordinates =
  {{0.09 * months, 0.1}, {0.865 * months, 0.9}, {0.09 * months, 0.35}, {0.09 * months, 0.6}};
textCoordinates[[2]] = {0.865 * months, 0.65};
textCoordinates[[4]] = {0.865 * months, 0.9};
g2 = Show[display[annotation, displayNumber, xplotlabel,
  xlabel, ylabel, medianTicks, highlight, columnLabel], ImageSize -> 250];

displayNumber = 4;
annotation = "Arraylet_Xq/Residual_Disease";
firstAnnotation = "Low/Yes";
secondAnnotation = "High/No";
thirdAnnotation = "High/Yes";
fourthAnnotation = "Low/No";
highlight = True;
xplotlabel = "(c)";
xlabel = False;
ylabel = "False";
medianTicks = Table["", {a, 1, 8}];
medianTicks[[5]] = " ";
medianTicks[[8]] = " ";
hazardRatio = "s = 2.2/2.7";
pValue = 1.3 * 10^-3;
columnLabel = "Xq";
textCoordinates =
  {{0.09 * months, 0.1}, {0.865 * months, 0.9}, {0.09 * months, 0.35}, {0.09 * months, 0.6}};
textCoordinates[[4]] = {0.865 * months, 0.65};
g3 = Show[display[annotation, displayNumber, xplotlabel,
  xlabel, ylabel, medianTicks, highlight, columnLabel], ImageSize -> 250];

```



```

displayNumber = 4;
annotation = "Arraylet_6p+12p/Therapy_Outcome";
firstAnnotation = "High/No";
secondAnnotation = "Low/CR";
thirdAnnotation = "Low/No";
fourthAnnotation = "High/CR";
highlight = True;
xplotlabel = "(d)";
xlabel = False;
ylabel = "from the Validation Set";
medianTicks = Table["", {a, 1, 8}];
hazardRatio = "s=2.0/3.8";
pValue = 3.8 * 10^-8;
columnLabel = "";
textCoordinates =
  {{0.09 * months, 0.1}, {0.865 * months, 0.9}, {0.09 * months, 0.35}, {0.09 * months, 0.6}};
textCoordinates[[4]] = {0.865 * months, 0.65};
g4 = Show[display[annotation, displayNumber, xplotlabel,
  xlabel, ylabel, medianTicks, highlight, columnLabel], ImageSize -> 250];

```

```

displayNumber = 4;
annotation = "Arraylet_7p/Therapy_Outcome";
firstAnnotation = "Low/No";
secondAnnotation = "High/CR";
thirdAnnotation = "High/No";
fourthAnnotation = "Low/CR";
highlight = True;
xplotlabel = "(e)";
xlabel = False;
ylabel = "False";
medianTicks = Table["", {a, 1, 8}];
medianTicks[[2]] = " ";
hazardRatio = "blank";
pValue = 3.5 * 10^-7;
columnLabel = "";
textCoordinates =
  {{0.09 * months, 0.1}, {0.865 * months, 0.9}, {0.09 * months, 0.35}, {0.09 * months, 0.6}};
textCoordinates[[4]] = {0.865 * months, 0.65};
g5 = Show[display[annotation, displayNumber, xplotlabel,
  xlabel, ylabel, medianTicks, highlight, columnLabel], ImageSize -> 250];

```

```

displayNumber = 4;
annotation = "Arraylet_Xq/Therapy_Outcome";
firstAnnotation = "Low/No";
secondAnnotation = "High/CR";
thirdAnnotation = "High/No";
fourthAnnotation = "Low/CR";
highlight = True;
xplotlabel = "(f)";
xlabel = False;
ylabel = "False";
medianTicks = Table["", {a, 1, 8}];
hazardRatio = "s=2.1/3.9";
pValue = 6.6 * 10^-9;
columnLabel = "";
textCoordinates =
  {{0.09 * months, 0.1}, {0.865 * months, 0.9}, {0.09 * months, 0.35}, {0.09 * months, 0.6}};
textCoordinates[[4]] = {0.865 * months, 0.65};
g6 = Show[display[annotation, displayNumber, xplotlabel,
  xlabel, ylabel, medianTicks, highlight, columnLabel], ImageSize -> 250];

```

```

displayNumber = 4;
annotation = "Arraylet_6p+12p/Neoplasm_Status";
firstAnnotation = "High/W";
secondAnnotation = "Low/WO";
thirdAnnotation = "Low/W";
fourthAnnotation = "High/WO";
highlight = True;
xplotlabel = "(g)";
xlabel = True;
ylabel = "from the Validation Set";
medianTicks = Table["", {a, 1, 8}];
hazardRatio = "s = 1.8/15.6";
pValue = N[8 * 10^-5];
columnLabel = "";
textCoordinates =
  {{0.09 * months, 0.1}, {0.865 * months, 0.9}, {0.09 * months, 0.35}, {0.09 * months, 0.6}};
textCoordinates[[2]] = {0.865 * months, 0.6 - 0.03};
textCoordinates[[4]] = {0.865 * months, 0.35 - 0.03};
g7 = Show[display[annotation, displayNumber, xplotlabel,
  xlabel, ylabel, medianTicks, highlight, columnLabel], ImageSize -> 250];

```

```

displayNumber = 4;
annotation = "Arraylet_7p/Neoplasm_Status";
firstAnnotation = "Low/W";
secondAnnotation = "High/WO";
thirdAnnotation = "High/W";
fourthAnnotation = "Low/WO";
highlight = True;
xplotlabel = "(h)";
xlabel = True;
ylabel = "False";
medianTicks = Table["", {a, 1, 8}];
medianTicks[[8]] = " ";
hazardRatio = "s = 1.8/16.6";
pValue = 7.0 * 10^-5;
columnLabel = "";
textCoordinates =
  {{0.09 * months, 0.1}, {0.865 * months, 0.9}, {0.09 * months, 0.35}, {0.09 * months, 0.6}};
textCoordinates[[2]] = {0.865 * months, 0.6 - 0.03};
textCoordinates[[4]] = {0.865 * months, 0.35 - 0.03};
g8 = Show[display[annotation, displayNumber, xplotlabel,
  xlabel, ylabel, medianTicks, highlight, columnLabel], ImageSize -> 250];

```

```

displayNumber = 4;
annotation = "Arraylet_Xq/NeoplasM_Status";
firstAnnotation = "Low/W";
secondAnnotation = "High/WO";
thirdAnnotation = "High/W";
fourthAnnotation = "Low/WO";
highlight = True;
xplotlabel = "(i)";
xlabel = True;
ylabel = "False";
medianTicks = Table["", {a, 1, 8}];
medianTicks[[6]] = " ";
medianTicks[[7]] = " ";
hazardRatio = "s = 1.8/16.0";
pValue = 1.2 * 10^-4;
columnLabel = "";
textCoordinates =
  {{0.09 * months, 0.1}, {0.865 * months, 0.9}, {0.09 * months, 0.35}, {0.09 * months, 0.6}};
textCoordinates[[2]] = {0.865 * months, 0.6 - 0.03};
textCoordinates[[4]] = {0.865 * months, 0.35 - 0.03};
g9 = Show[display[annotation, displayNumber, xplotlabel,
  xlabel, ylabel, medianTicks, highlight, columnLabel], ImageSize -> 250];

figI =
  GraphicsGrid[{{g1, g2, g3}, {g4, g5, g6}, {g7, g8, g9}}, ImageSize -> 750, Spacings -> {-67, -12}]

```

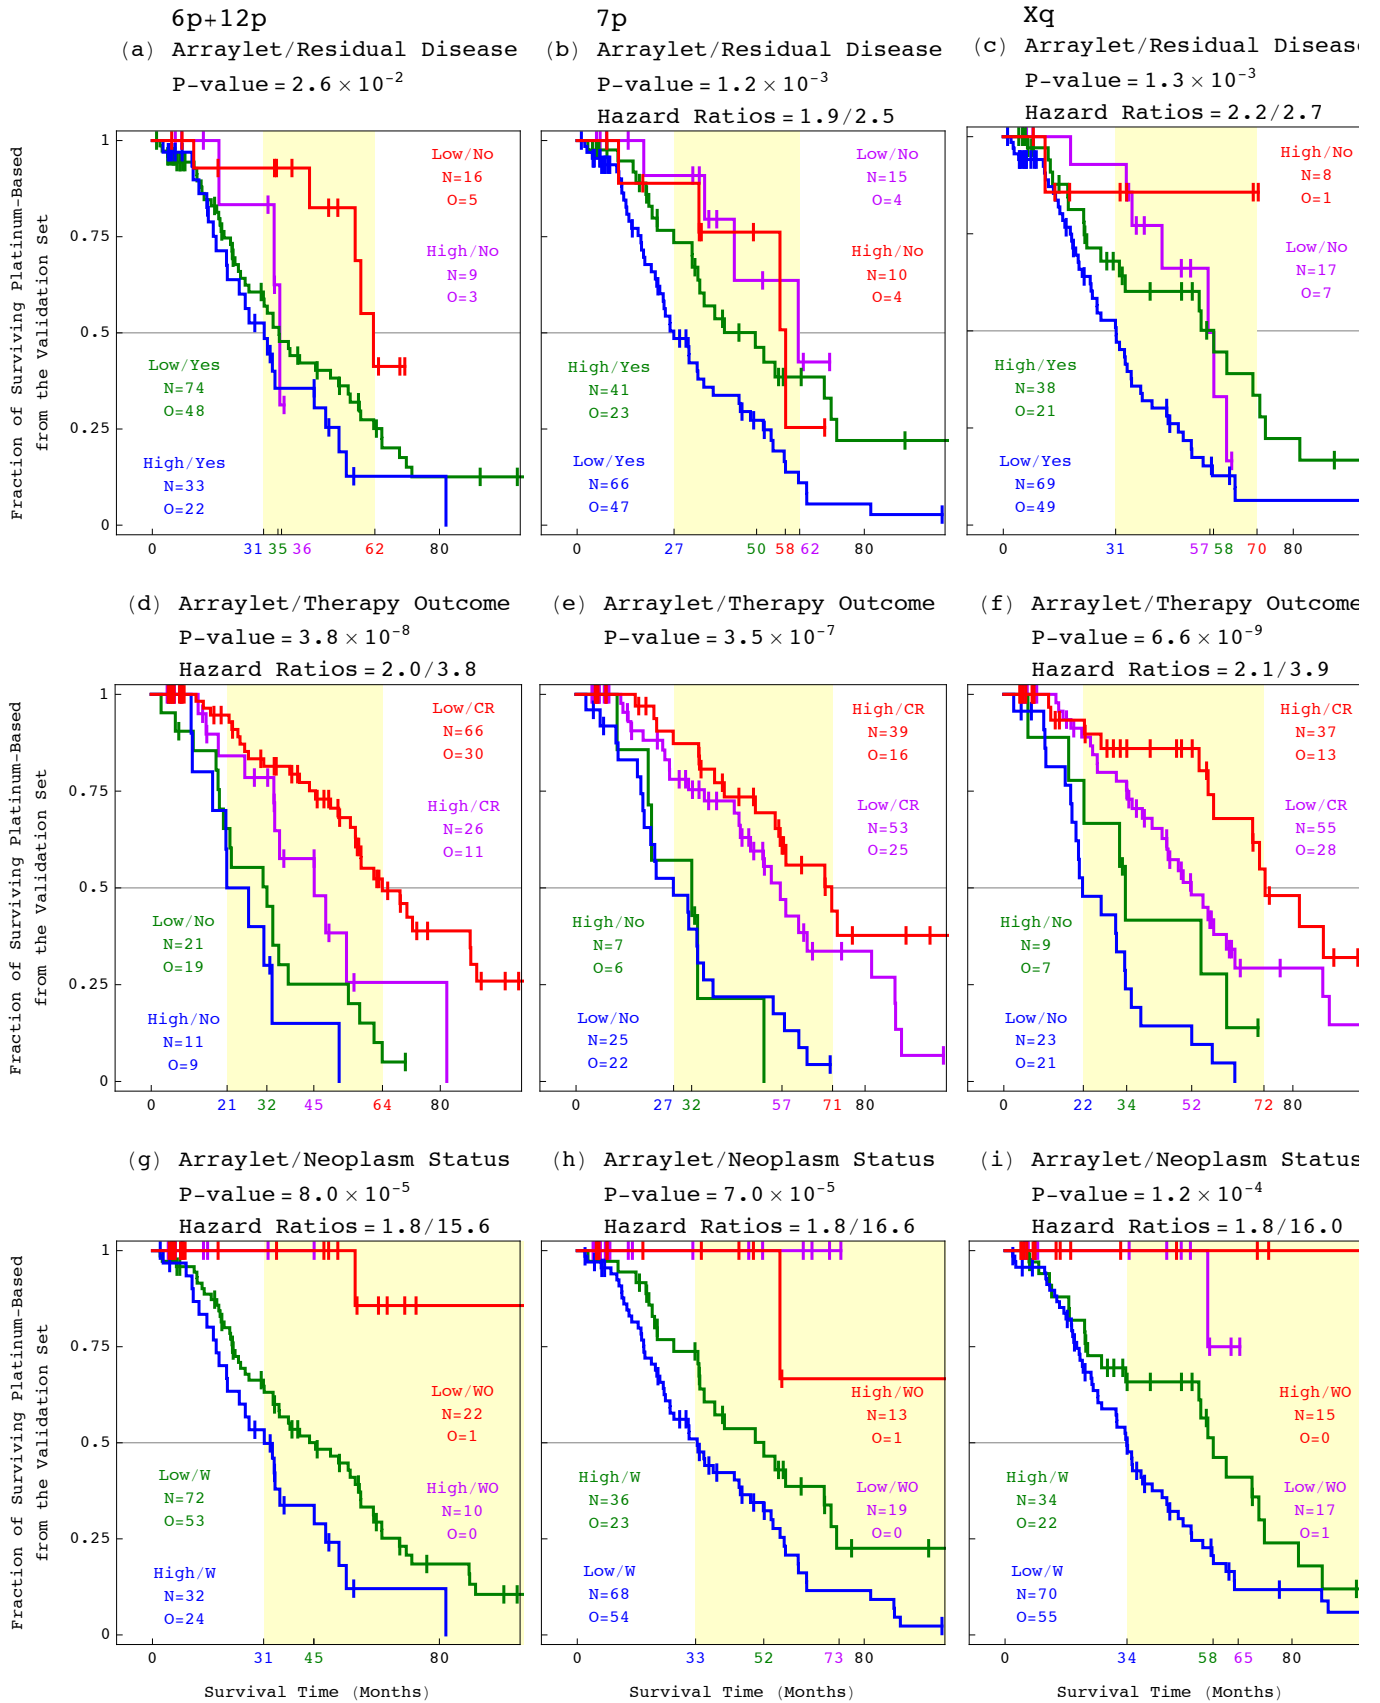

Export[path < "Figure\_I.pdf", figI, "PDF", ImageSize → 750, ImageResolution → resolution];

```
(* Display the Survival Analyses of the Discovery and Validation Patients Classified by the Three Probelets and Arraylets *)
```

```
title = "Fraction of Surviving Patients";
```

```
stream = path <> "Discovery_Patients.txt";  
annotations = Import[stream, "Table"];  
{patients, annotationsNumber} = Dimensions[annotations] - {1, 1};  
annotationNames = Take[annotations, 1, {2, annotationsNumber + 1}][[1]];  
annotations = Drop[Import[stream, "Table"], 1, 1];  
Clear[stream];
```

```
times = Table[  
  If[annotationColumn["Days_Death"][[a]] == "Null",  
    If[annotationColumn["Days_Followup"][[a]] == "Null",  
      "Null",  
      annotationColumn["Days_Followup"][[a]] / monthConversion],  
    annotationColumn["Days_Death"][[a]] / monthConversion],  
  {a, 1, patients}];  
status = Table[If[annotationColumn["Days_Death"][[a]] == "Null",  
  If[annotationColumn["Days_Followup"][[a]] == "Null", 2, 0], 1],  
  {a, 1, patients}];
```

```
positionNull = Position[status, 2];
```

```
Do[{  
  annotations = Drop[annotations, positionNull[[a]]],  
  times = Drop[times, positionNull[[a]]],  
  status = Drop[status, positionNull[[a]]],  
  {a, Dimensions[positionNull][[1]], 1, -1}]  
patients = patients - Dimensions[positionNull][[1]];
```

```
displayNumber = 3;  
annotation = "Three_Probelets_(Comb.)";  
firstAnnotation = "C";  
secondAnnotation = "A";  
thirdAnnotation = "B";  
highlight = True;  
xplotlabel = "(a)";  
xlabel = False;  
ylabel = "from the Discovery Set";  
medianTicks = Table["", {a, 1, 8}];  
medianTicks[[3]] = " ";  
hazardRatio = "";  
columnLabel = "";  
pValue =  $1.4 * 10^{-4}$ ;  
textCoordinates = {{0.09 * months, 0.1}, {0.865 * months, 0.9}, {0.09 * months, 0.35}};  
g1 = Show[display[annotation, displayNumber, xplotlabel,  
  xlabel, ylabel, medianTicks, highlight, columnLabel], ImageSize -> 287.5];
```

```
title = "Fraction of Surviving Platinum-Based";
```

```
stream = path <> "Discovery_Patients.txt";  
annotations = Import[stream, "Table"];  
{patients, annotationsNumber} = Dimensions[annotations] - {1, 1};  
annotationNames = Take[annotations, 1, {2, annotationsNumber + 1}][[1]];  
annotations = Drop[Import[stream, "Table"], 1, 1];  
Clear[stream];
```

```

times = Table[
  If[annotationColumn["Days_Death"][[a]] == "Null",
    If[annotationColumn["Days_Followup"][[a]] == "Null",
      "Null",
      annotationColumn["Days_Followup"][[a]] / monthConversion],
    annotationColumn["Days_Death"][[a]] / monthConversion],
  {a, 1, patients}];
status = Table[
  If[annotationColumn["Platinum-Based_Chemotherapy"][[a]] == "Null", 2,
    If[annotationColumn["Platinum-Based_Chemotherapy"][[a]] == "No", 2,
      If[annotationColumn["Days_Death"][[a]] == "Null",
        If[annotationColumn["Days_Followup"][[a]] == "Null", 2, 0], 1]]],
  {a, 1, patients}];
positionNull = Position[status, 2];
Do[{
  annotations = Drop[annotations, positionNull[[a]]],
  times = Drop[times, positionNull[[a]]],
  status = Drop[status, positionNull[[a]]]},
  {a, Dimensions[positionNull][[1]], 1, -1}]
patients = patients - Dimensions[positionNull][[1]];

displayNumber = 3;
annotation = "Three_Probelets_(Comb.)";
firstAnnotation = "C";
secondAnnotation = "A";
thirdAnnotation = "B";
highlight = True;
xplotlabel = "(b)";
xlabel = False;
ylabel = "Chemo. Patients from the Discovery Set";
medianTicks = Table["", {a, 1, 8}];
medianTicks[[3]] = " ";
hazardRatio = "";
pValue = 6.5 * 10^-4;
columnLabel = "";
textCoordinates = {{0.09 * months, 0.1}, {0.865 * months, 0.9}, {0.09 * months, 0.35}};
g2 = Show[display[annotation, displayNumber, xplotlabel,
  xlabel, ylabel, medianTicks, highlight, columnLabel], ImageSize -> 287.5];

title = "Fraction of Surviving Patients";

stream = path <> "Validation_Patients.txt";
annotations = Import[stream, "Table"];
{patients, annotationsNumber} = Dimensions[annotations] - {1, 1};
annotationNames = Take[annotations, 1, {2, annotationsNumber + 1}][[1]];
annotations = Drop[Import[stream, "Table"], 1, 1];
Clear[stream];

```

```

times = Table[
  If[annotationColumn["Days_Death"][[a]] == "Null",
    If[annotationColumn["Days_Followup"][[a]] == "Null",
      "Null",
      annotationColumn["Days_Followup"][[a]] / monthConversion],
    annotationColumn["Days_Death"][[a]] / monthConversion],
  {a, 1, patients}];
status = Table[If[annotationColumn["Days_Death"][[a]] == "Null",
  If[annotationColumn["Days_Followup"][[a]] == "Null", 2, 0], 1],
  {a, 1, patients}];
positionNull = Position[status, 2];
Do[{
  annotations = Drop[annotations, positionNull[[a]]],
  times = Drop[times, positionNull[[a]]],
  status = Drop[status, positionNull[[a]]]},
  {a, Dimensions[positionNull][[1]], 1, -1}]
patients = patients - Dimensions[positionNull][[1]];

displayNumber = 3;
annotation = "Three_Arraylets_(Comb.)";
firstAnnotation = "C";
secondAnnotation = "A";
thirdAnnotation = "B";
highlight = True;
xplotlabel = "(c)";
xlabel = True;
ylabel = "from the Validation Set";
medianTicks = Table["", {a, 1, 8}];
hazardRatio = "";
pValue = 8.1 * 10^-4;
columnLabel = "";
textCoordinates = {{0.09 * months, 0.1}, {0.865 * months, 0.9}, {0.09 * months, 0.35}};
g3 = Show[display[annotation, displayNumber, xplotlabel,
  xlabel, ylabel, medianTicks, highlight, columnLabel], ImageSize -> 287.5];

title = "Fraction of Surviving Platinum-Based";

stream = path <> "Validation_Patients.txt";
annotations = Import[stream, "Table"];
{patients, annotationsNumber} = Dimensions[annotations] - {1, 1};
annotationNames = Take[annotations, 1, {2, annotationsNumber + 1}][[1]];
annotations = Drop[Import[stream, "Table"], 1, 1];
Clear[stream];

```

```

times = Table[
  If[annotationColumn["Days_Death"][[a]] == "Null",
    If[annotationColumn["Days_Followup"][[a]] == "Null",
      "Null",
      annotationColumn["Days_Followup"][[a]] / monthConversion],
    annotationColumn["Days_Death"][[a]] / monthConversion],
  {a, 1, patients}];
status = Table[
  If[annotationColumn["Platinum-Based_Chemotherapy"][[a]] == "Null", 2,
    If[annotationColumn["Platinum-Based_Chemotherapy"][[a]] == "No", 2,
      If[annotationColumn["Days_Death"][[a]] == "Null",
        If[annotationColumn["Days_Followup"][[a]] == "Null", 2, 0], 1]]],
  {a, 1, patients}];
positionNull = Position[status, 2];
Do[{
  annotations = Drop[annotations, positionNull[[a]]],
  times = Drop[times, positionNull[[a]]],
  status = Drop[status, positionNull[[a]]]},
  {a, Dimensions[positionNull][[1]], 1, -1}]
patients = patients - Dimensions[positionNull][[1]];

displayNumber = 3;
annotation = "Three_Arraylets_(Comb.)";
firstAnnotation = "C";
secondAnnotation = "A";
thirdAnnotation = "B";
highlight = True;
xplotlabel = "(d)";
xlabel = True;
ylabel = "Chemo. Patients from the Validation Set";
medianTicks = Table["", {a, 1, 8}];
hazardRatio = "";
pValue = 1.0 * 10^-3;
columnLabel = "";
textCoordinates = {{0.09 * months, 0.1}, {0.865 * months, 0.9}, {0.09 * months, 0.35}};
g4 = Show[display[annotation, displayNumber, xplotlabel,
  xlabel, ylabel, medianTicks, highlight, columnLabel], ImageSize -> 287.5];

```



fig4 = GraphicsGrid[{{g1, g2}}, {g3, g4}], ImageSize -> 575, Spacings -> {0, -14}]

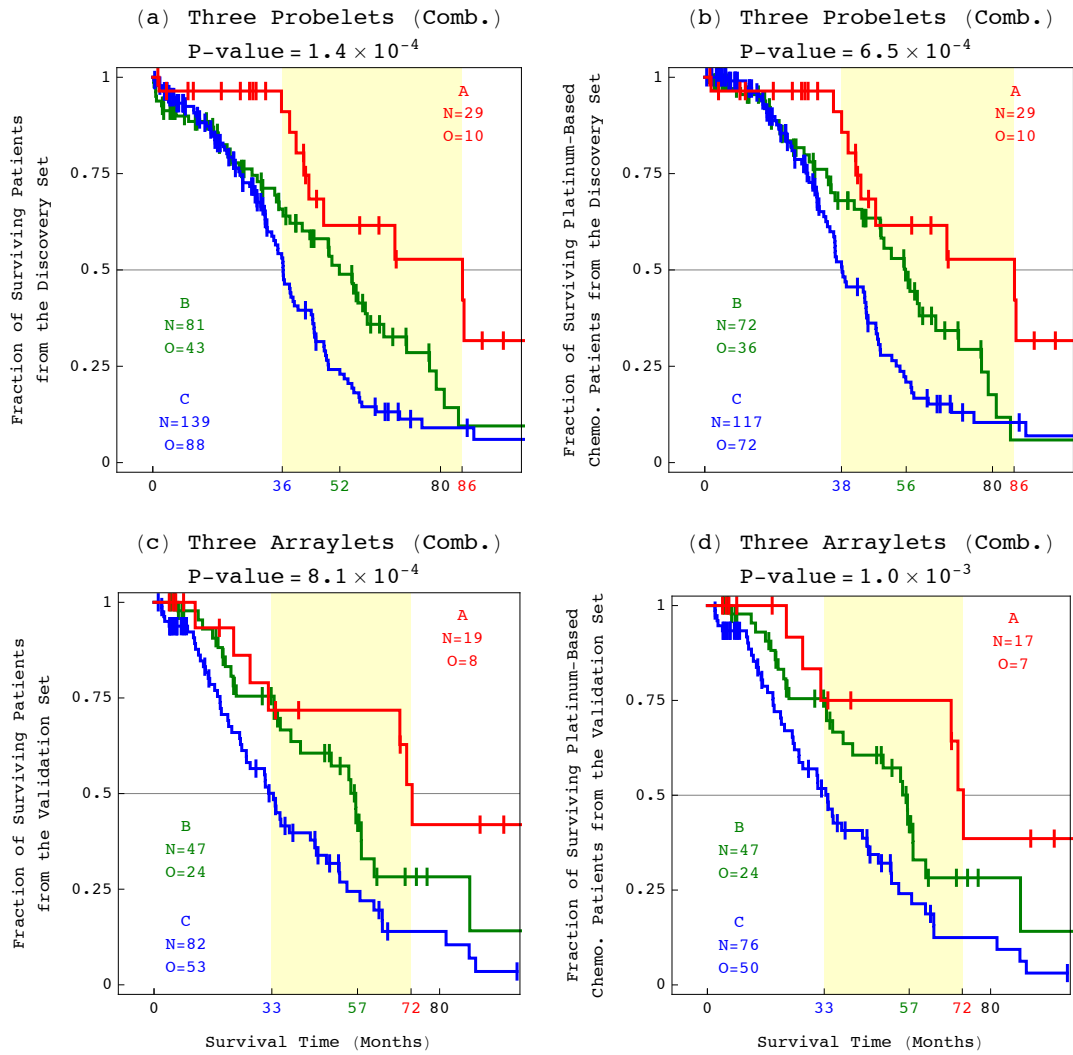

Export[path <> "Figure\_4.pdf", fig4, "PDF", ImageSize -> 575, ImageResolution -> resolution];

```
(* Display the Survival Analyses of the Novel Focal Copy-Number Alterations *)
```

```
(* Read TCGA Annotations of the Discovery Patients *)
```

```
title = "Fraction of Surviving Patients from";
```

```
stream = path<> "Discovery_Patients.txt";
```

```
annotations = Import[stream, "Table"];
```

```
{patients, annotationsNumber} = Dimensions[annotations] - {1, 1};
```

```
annotationNames = Take[annotations, 1, {2, annotationsNumber + 1}][[1]];
```

```
annotations = Drop[Import[stream, "Table"], 1, 1];
```

```
Clear[stream];
```

```
colIdx = {Position[annotationNames, "Days_Death"][[1]][[1]],
```

```
  Position[annotationNames, "Days_Followup"][[1]][[1]],
```

```
  Position[annotationNames, "6p+12p_Segment_10_(SOX5)"][[1]][[1]],
```

```
  Position[annotationNames, "6p+12p_Segment_11_(SOX5)"][[1]][[1]],
```

```
  Position[annotationNames, "6p+12p_Segment_13_(ITPR2)"][[1]][[1]],
```

```
  Position[annotationNames, "6p+12p_Segment_14_(ASUN)"][[1]][[1]],
```

```
  Position[annotationNames, "7p_Segment_4_(RPA3)"][[1]][[1]],
```

```
  Position[annotationNames, "Xq_Segment_10_(PABPC5)"][[1]][[1]]};
```

```
annotationNames = annotationNames[[colIdx]];
```

```
annotations = annotations[[All, colIdx]];
```

```
times = Table[
```

```
  If[annotationColumn["Days_Death"][[a]] == "Null",
```

```
    If[annotationColumn["Days_Followup"][[a]] == "Null",
```

```
      "Null",
```

```
      annotationColumn["Days_Followup"][[a]] / monthConversion],
```

```
    annotationColumn["Days_Death"][[a]] / monthConversion],
```

```
  {a, 1, patients}];
```

```
status = Table[If[annotationColumn["Days_Death"][[a]] == "Null",
```

```
  If[annotationColumn["Days_Followup"][[a]] == "Null", 2, 0], 1],
```

```
  {a, 1, patients}];
```

```
positionNull = Position[status, 2];
```

```
Do[{
```

```
  annotations = Drop[annotations, positionNull[[a]]],
```

```
  times = Drop[times, positionNull[[a]]],
```

```
  status = Drop[status, positionNull[[a]]],
```

```
  {a, Dimensions[positionNull][[1]], 1, -1}]
```

```
patients = patients - Dimensions[positionNull][[1]];
```

```
annotationsDisc = annotations;
```

```
timesDisc = times;
```

```
statusDisc = status;
```

```
patientsDisc = patients;
```

```
(* Read TCGA Annotations of the Validation Patients *)
```

```
stream = path<> "Validation_Patients.txt";
```

```
annotations = Import[stream, "Table"];
```

```
{patients, annotationsNumber} = Dimensions[annotations] - {1, 1};
```

```
annotationNames = Take[annotations, 1, {2, annotationsNumber + 1}][[1]];
```

```
annotations = Drop[Import[stream, "Table"], 1, 1];
```

```
Clear[stream];
```

```

colIdx = {Position[annotationNames, "Days_Death"] [[1]] [[1]],
  Position[annotationNames, "Days_Followup"] [[1]] [[1]],
  Position[annotationNames, "6p+12p_Segment_10_(SOX5)"] [[1]] [[1]],
  Position[annotationNames, "6p+12p_Segment_11_(SOX5)"] [[1]] [[1]],
  Position[annotationNames, "6p+12p_Segment_13_(ITPR2)"] [[1]] [[1]],
  Position[annotationNames, "6p+12p_Segment_14_(ASUN)"] [[1]] [[1]],
  Position[annotationNames, "7p_Segment_4_(RPA3)"] [[1]] [[1]],
  Position[annotationNames, "Xq_Segment_10_(PABPC5)"] [[1]] [[1]]};

annotationNames = annotationNames [[colIdx]];
annotations = annotations [[All, colIdx]];

times = Table[
  If[annotationColumn["Days_Death"] [[a]] == "Null",
    If[annotationColumn["Days_Followup"] [[a]] == "Null",
      "Null",
      annotationColumn["Days_Followup"] [[a]] / monthConversion],
    annotationColumn["Days_Death"] [[a]] / monthConversion],
  {a, 1, patients}];
status = Table[If[annotationColumn["Days_Death"] [[a]] == "Null",
  If[annotationColumn["Days_Followup"] [[a]] == "Null", 2, 0], 1],
  {a, 1, patients}];
positionNull = Position[status, 2];
Do[{
  annotations = Drop[annotations, positionNull [[a]]],
  times = Drop[times, positionNull [[a]]],
  status = Drop[status, positionNull [[a]]],
  {a, Dimensions[positionNull] [[1]], 1, -1}]
patients = patients - Dimensions[positionNull] [[1]];

annotationsVal = annotations;
timesVal = times;
statusVal = status;
patientsVal = patients;

(* Join TCGA Annotations of the Discovery and Validation Patients *)

annotations = Join[annotationsDisc, annotationsVal];
times = Join[timesDisc, timesVal];
status = Join[statusDisc, statusVal];
patients = patientsDisc + patientsVal;

(* Create KM Curves for Patients Classified by mRNA Expression Levels *)

displayNumber = 2;
fourthMedian = 0;
annotation = "6p+12p_Segment_10_(SOX5)";
firstAnnotation = "Gain";
secondAnnotation = "No_CNA";
highlight = True;
xplotlabel = "(a)";
xlabel = False;
ylabel = "the Discovery and Validation Sets";
columnLabel = "";
medianTicks = Table["", {a, 1, 8}];
pValue = 5.2 * 10^-5;
hazardRatio = "= 1.9";
textCoordinates = {{0.09 * months, 0.1}, {0.865 * months, 0.9}};
g1 = Show[display[annotation, displayNumber, xplotlabel,
  xlabel, ylabel, medianTicks, highlight, columnLabel], ImageSize -> 250];

```

```

displayNumber = 2;
fourthMedian = 0;
annotation = "6p+12p_Segment_11_(SOX5)";
firstAnnotation = "Gain";
secondAnnotation = "No_CNA";
highlight = True;
xplotlabel = "(b)";
xlabel = False;
ylabel = "False";
columnLabel = "";
medianTicks = Table["", {a, 1, 8}];
pValue = 2.5 * 10^-3;
hazardRatio = "= 1.6";
textCoordinates = {{0.09 * months, 0.1}, {0.865 * months, 0.9}};
g2 = Show[display[annotation, displayNumber, xplotlabel,
  xlabel, ylabel, medianTicks, highlight, columnLabel], ImageSize -> 250];

displayNumber = 2;
fourthMedian = 0;
annotation = "6p+12p_Segment_13_(ITPR2)";
firstAnnotation = "Gain";
secondAnnotation = "No_CNA";
highlight = True;
xplotlabel = "(c)";
xlabel = False;
ylabel = "False";
columnLabel = "";
medianTicks = Table["", {a, 1, 8}];
pValue = 1.6 * 10^-3;
hazardRatio = "= 1.6";
textCoordinates = {{0.09 * months, 0.1}, {0.865 * months, 0.9}};
g3 = Show[display[annotation, displayNumber, xplotlabel,
  xlabel, ylabel, medianTicks, highlight, columnLabel], ImageSize -> 250];

displayNumber = 2;
fourthMedian = 0;
annotation = "6p+12p_Segment_14_(ASUN)";
firstAnnotation = "Gain";
secondAnnotation = "No_CNA";
highlight = True;
xplotlabel = "(d)";
xlabel = True;
ylabel = "the Discovery and Validation Sets";
columnLabel = "";
medianTicks = Table["", {a, 1, 8}];
pValue = 5.7 * 10^-3;
hazardRatio = "= 1.5";
textCoordinates = {{0.09 * months, 0.1}, {0.865 * months, 0.9}};
g4 = Show[display[annotation, displayNumber, xplotlabel,
  xlabel, ylabel, medianTicks, highlight, columnLabel], ImageSize -> 250];

```

```

displayNumber = 2;
fourthMedian = 0;
annotation = "7p_Segment_4_(RPA3)";
firstAnnotation = "No_CNA";
secondAnnotation = "Loss";
highlight = True;
xplotlabel = "(e)";
xlabel = True;
ylabel = "False";
columnLabel = "";
medianTicks = Table["", {a, 1, 8}];
pValue = 4.8 * 10^-3;
hazardRatio = "= 1.6";
textCoordinates = {{0.09 * months, 0.1}, {0.865 * months, 0.9}};
g5 = Show[display[annotation, displayNumber, xplotlabel,
  xlabel, ylabel, medianTicks, highlight, columnLabel], ImageSize -> 250];

displayNumber = 2;
fourthMedian = 0;
annotation = "Xq_Segment_10_(PABPC5)";
firstAnnotation = "No_CNA";
secondAnnotation = "Loss";
highlight = True;
xplotlabel = "(f)";
xlabel = True;
ylabel = "False";
columnLabel = "";
medianTicks = Table["", {a, 1, 8}];
pValue = 3.3 * 10^-2;
hazardRatio = "= 1.4";
textCoordinates = {{0.09 * months, 0.1}, {0.865 * months, 0.9}};
g6 = Show[display[annotation, displayNumber, xplotlabel,
  xlabel, ylabel, medianTicks, highlight, columnLabel], ImageSize -> 250];

```

```
figJ = GraphicsGrid[{{g1, g2, g3}, {g4, g5, g6}}, ImageSize -> 750, Spacings -> {-67, -12}]
```

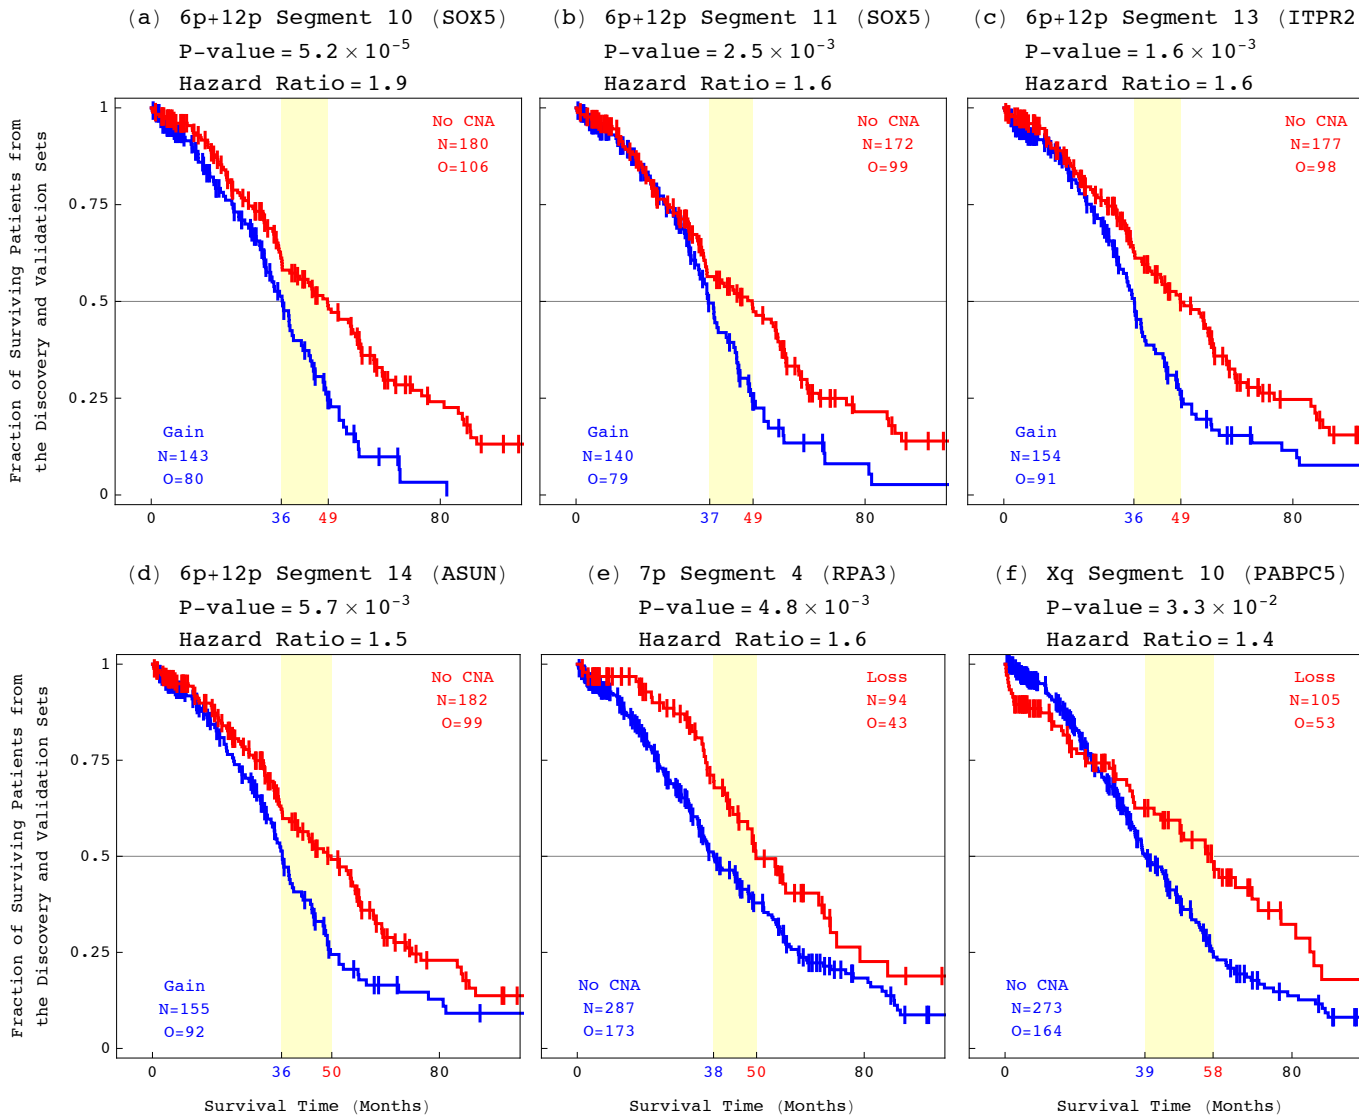

```
Export[path <> "Figure_J.pdf", figJ, "PDF", ImageSize -> 750, ImageResolution -> resolution];
```

```
(* Display Differential mRNA, microRNA, and Protein Expression between the Tensor GSVD Classes *)
```

```
(* Define the Boxplot Display *)
```

```
boxPlot[data_, dataLabels_, frameLabels_, frameTicks_, plotLabel_,  
  plotRange_, text_, alignmnt_, text1_, colors_] := {nData = Dimensions[data][[1]];  
  pValue = MannWhitneyTest[{data[[1]], data[[2]]}];  
  g = Table[{}, {a, 1, nData}];  
  bins = Flatten[Table[  
    Labeled[{}, Style[ColumnForm[{dataLabels[[a]], "N=" <> ToString[Length[data[[a]]]}],  
      Center], colors[[a]]], {a, 2, nData}];  
  Do[g[[a]] = BoxWhiskerChart[Flatten[If[a == 1, {Labeled[data[[a]],  
    Style[ColumnForm[{dataLabels[[a]], "N=" <> ToString[Length[data[[a]]]}], Center],  
    colors[[a]]}, If[nData == 3, {bins[[1]], bins[[2]]}, bins[[1]]]},  
    {Table[If[b == a, Labeled[data[[b]], ColumnForm[{dataLabels[[b]],  
      "N=" <> ToString[Length[data[[b]]]}], Center], {}, {b, 1, nData}]}], 1],  
    {"Median", {"Outliers", "●", colors[[a]]}, {"MedianMarker", colors[[a]]},  
    {"Whiskers", colors[[a]]}, {"Fences", colors[[a]]}],  
    PlotLabel → Style[Column[{plotLabel[[1]], text1 <> plotLabel[[2]]},  
      StringJoin[text <> "P-value = ", ToString[TraditionalForm[ScientificForm[pValue, 2,  
        NumberPoint →  
          If[Dimensions[Characters[ToString[NumberForm[pValue, 2, NumberFormat → (#1 &),  
            ExponentFunction → (# &)]][[1]] < 3, ".0", "."]]}], alignmnt],  
        SingleLetterItalics → False], If[Length[plotRange] > 0, PlotRange → plotRange,  
        PlotRange → {{0.48, Automatic}, {-0.22, 0.22}}],  
        FrameTicks → {{frameTicks, None}, {None, None}},  
        FrameLabel → frameLabels,  
        ImageSize → 250, BarSpacing → Tiny,  
        ChartBaseStyle → Directive[EdgeForm[{Thick, colors[[a]]}, White, Thick],  
        AspectRatio → 1,  
        BaseStyle → {FontFamily → "Courier", FontSize → 10}], {a, 1, nData}];  
  Show[Table[g[[a]], {a, 1, nData}]]
```

```
(* Determine the Tensor GSVD Classes and Display the Boxplots *)
```

```
plotBarChart[minval_, maxval_, segtext_, grp1text_, grp2text_, exptext_, xlabel_, ylabel_,  
  yticks_, figtitle_, patientFile_, text_, alignmnt_: Left, text1_: "", colors_] :=  
Module[{genepos, ncnapos, expressionpos, nocna, cna, nullPosition},  
  {genepos = Position[patientFile[[1]], segtext][[1, 1]];  
  ncnapos = Flatten[Position[patientFile[[All, genepos]], grp1text]];  
  expressionpos = Position[patientFile[[1]], exptext][[1, 1]];  
  nocna = Flatten[patientFile[[ncnapos, expressionpos]]];  
  nullPosition = Position[nocna, "Null"];  
  If[nullPosition ≠ {}, nocna = Delete[nocna, nullPosition];];  
  ncnapos = Flatten[Position[patientFile[[All, genepos]], grp2text]];  
  cna = Flatten[patientFile[[ncnapos, expressionpos]]];  
  nullPosition = Position[cna, "Null"];  
  If[nullPosition ≠ {}, cna = Delete[cna, nullPosition];];  
  boxPlot[{cna, nocna}, {StringReplace[grp2text, "_" → " "],  
    StringReplace[grp1text, "_" → " "], {xlabel, ylabel}, yticks, figtitle,  
    {{0.48, Automatic}, {minval, maxval}}, text, alignmnt, text1, colors][[1]]]
```

```
(* Read TCGA Annotations of the Patients *)
```

```
patientFile = Join[Import[path <> "Discovery_Patients.txt", "TSV"],  
  Import[path <> "Validation_Patients.txt", "TSV"][[2 ;;]]];
```

```
(* Display Differential mRNA Expression *)
```

```
minval = 2.75;  
maxval = 10.75;  
colors = {RGBColor[0, 0, 1], RGBColor[1, 0, 0], RGBColor[0, 0, 0], RGBColor[0, 1, 0]};  
g1 = plotBarChart[minval, maxval, "Probelet_6p+12p_(Coeff.)", "Low", "High", "mRNA_(TNF)",  
  " ", "Relative mRNA Expression", Table[{i, ToString[i]}, {i, 4, 10, 2}],  
  {"(a) 6p+12p Probelet (Coeff.)", "TNF"}, patientFile, " ", Left, " ", colors];  
g2 = plotBarChart[minval, maxval, "Probelet_6p+12p_(Coeff.)", "Low",  
  "High", "mRNA_(MAPK14)", " ", " ", Table[{i, " "}, {i, 4, 10, 2}],  
  {"(b) 6p+12p Probelet (Coeff.)", "MAPK14"}, patientFile, " ", Left, " ", colors];  
g3 = plotBarChart[minval, maxval, "Probelet_6p+12p_(Coeff.)", "Low",  
  "High", "mRNA_(CDKN1A)", " ", " ", Table[{i, " "}, {i, 4, 10, 2}],  
  {"(c) 6p+12p Probelet (Coeff.)", "CDKN1A"}, patientFile, " ", Left, " ", colors];  
  
g4 = plotBarChart[minval, maxval, "Probelet_6p+12p_(Coeff.)", "Low", "High",  
  "mRNA_(RAD51AP1)", " ", "Relative mRNA Expression", Table[{i, ToString[i]}, {i, 4, 10, 2}],  
  {"(d) 6p+12p Probelet (Coeff.)", "RAD51AP1"}, patientFile, " ", Left, " ", colors];  
g5 = plotBarChart[minval, maxval, "Probelet_6p+12p_(Coeff.)", "Low",  
  "High", "mRNA_(ITPR2)", " ", " ", Table[{i, " "}, {i, 4, 10, 2}],  
  {"(e) 6p+12p Probelet (Coeff.)", "ITPR2"}, patientFile, " ", Left, " ", colors];  
g6 = plotBarChart[minval, maxval, "Probelet_6p+12p_(Coeff.)", "Low",  
  "High", "mRNA_(ASUN)", " ", " ", Table[{i, " "}, {i, 4, 10, 2}],  
  {"(f) 6p+12p Probelet (Coeff.)", "ASUN"}, patientFile, " ", Left, " ", colors];  
  
colors = {RGBColor[1, 0, 0], RGBColor[0, 0, 1], RGBColor[0, 0, 0], RGBColor[0, 1, 0]};  
g7 = plotBarChart[minval, maxval, "Probelet_7p_(Coeff.)", "Low", "High", "mRNA_(RPA3)",  
  " ", "Relative mRNA Expression", Table[{i, ToString[i]}, {i, 4, 10, 2}],  
  {"(g) 7p Probelet (Coeff.)", "RPA3"}, patientFile, " ", Left, " ", colors];  
g8 = plotBarChart[minval, maxval, "Probelet_7p_(Coeff.)", "Low",  
  "High", "mRNA_(POLD2)", " ", " ", Table[{i, " "}, {i, 4, 10, 2}],  
  {"(h) 7p Probelet (Coeff.)", "POLD2"}, patientFile, " ", Left, " ", colors];  
g9 = plotBarChart[minval, maxval, "Probelet_Xq_(Coeff.)", "Low", "High",  
  "mRNA_(BCAP31)", " ", " ", Table[{i, " "}, {i, 4, 10, 2}],  
  {"(i) Xq Probelet (Coeff.)", "BCAP31"}, patientFile, " ", Left, " ", colors];  
  
figK =  
  GraphicsGrid[{{g1, g2, g3}, {g4, g5, g6}, {g7, g8, g9}}, ImageSize -> 750, Spacings -> {-67, 0}]
```



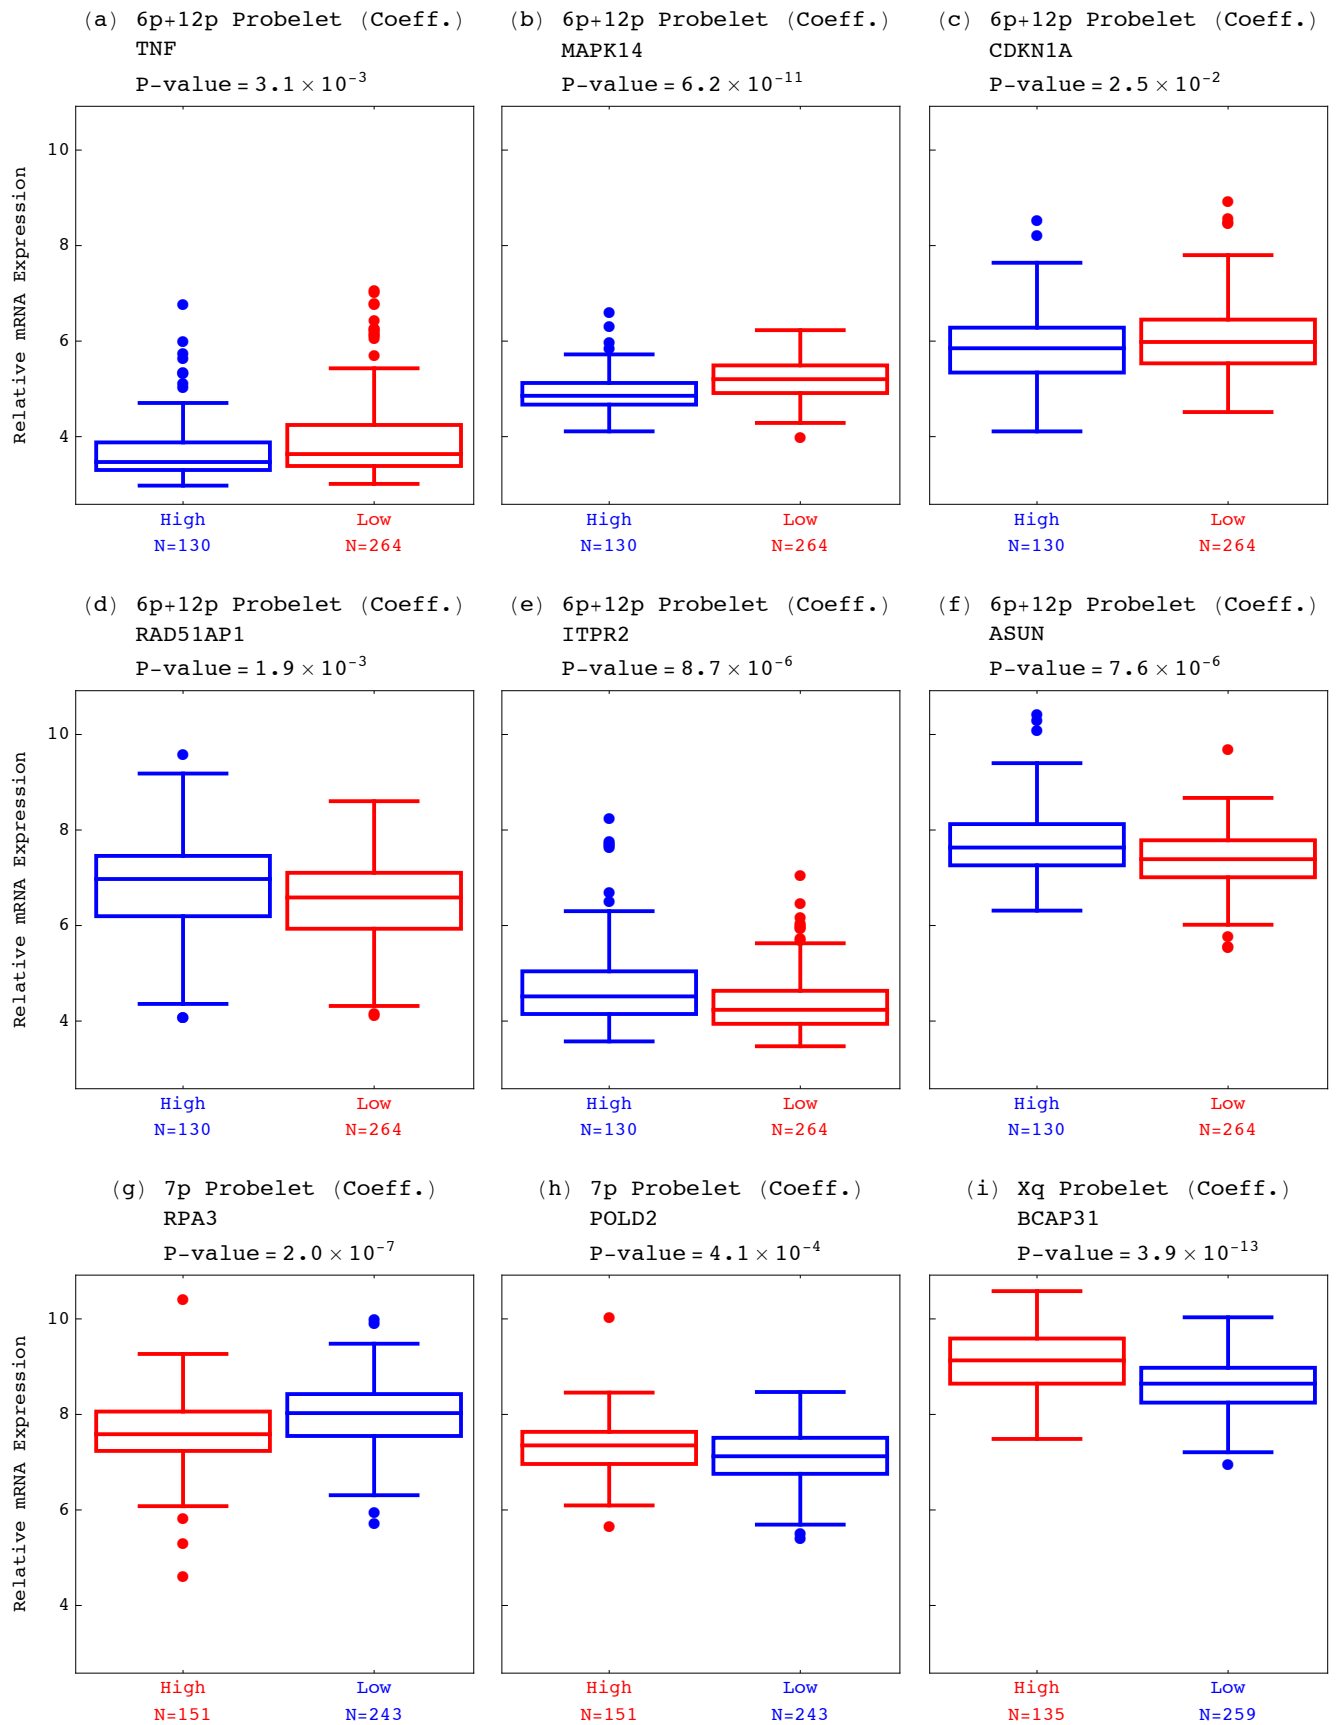

Export[path <> "Figure\_K.pdf", figK, "PDF", ImageSize -> 750];

```
(* Display Differential microRNA Expression *)
```

```
minval = 3.5;
maxval = 15.2;
colors = {RGBColor[0, 0, 1], RGBColor[1, 0, 0], RGBColor[0, 0, 0], RGBColor[0, 1, 0]};
g1 = plotBarChart[minval, maxval,
  "Probelet_6p+12p_(Coeff.)", "Low", "High", "microRNA_(hsa-miR-877*)",
  " ", "Relative microRNA Expression", Table[{i, ToString[i]}, {i, 4, 14, 2}],
  {"(a) 6p+12p Probelet (Coeff.)", "miR-877*"}, patientFile, " ", Left, " ", colors];
g2 = plotBarChart[minval, maxval, "Probelet_6p+12p_(Coeff.)", "Low",
  "High", "microRNA_(hsa-miR-200c)", " ", " ", Table[{i, " "}, {i, 4, 14, 2}],
  {"(b) 6p+12p Probelet (Coeff.)", "miR-200c"}, patientFile, " ", Left, " ", colors];
g3 = plotBarChart[minval, maxval, "Probelet_6p+12p_(Coeff.)", "Low", "High",
  "microRNA_(hsa-miR-200c*)", " ", " ", Table[{i, " "}, {i, 4, 14, 2}],
  {"(c) 6p+12p Probelet (Coeff.)", "miR-200c*"}, patientFile, " ", Left, " ", colors];
g4 = plotBarChart[minval, maxval,
  "Probelet_6p+12p_(Coeff.)", "Low", "High", "microRNA_(hsa-miR-141)", " ",
  "Relative microRNA Expression", Table[{i, ToString[i]}, {i, 4, 14, 2}],
  {"(d) 6p+12p Probelet (Coeff.)", "miR-141"}, patientFile, " ", Left, " ", colors];
g5 = plotBarChart[minval, maxval, "Probelet_6p+12p_(Coeff.)", "Low", "High",
  "microRNA_(hsa-miR-141*)", " ", " ", Table[{i, " "}, {i, 4, 14, 2}],
  {"(e) 6p+12p Probelet (Coeff.)", "miR-141*"}, patientFile, " ", Left, " ", colors];
colors = {RGBColor[1, 0, 0], RGBColor[0, 0, 1], RGBColor[0, 0, 0], RGBColor[0, 1, 0]};
g6 = plotBarChart[minval, maxval,
  "Probelet_Xq_(Coeff.)", "Low", "High", "microRNA_(hsa-miR-888)", " ",
  "Relative microRNA Expression", Table[{i, ToString[i]}, {i, 4, 14, 2}],
  {"(f) Xq Probelet (Coeff.)", "miR-888"}, patientFile, " ", Left, " ", colors];
g7 = plotBarChart[minval, maxval, "Probelet_Xq_(Coeff.)", "Low", "High",
  "microRNA_(hsa-miR-224)", " ", " ", Table[{i, " "}, {i, 4, 14, 2}],
  {"(g) Xq Probelet (Coeff.)", "miR-224"}, patientFile, " ", Left, " ", colors];
g8 = plotBarChart[minval, maxval, "Probelet_Xq_(Coeff.)", "Low", "High",
  "microRNA_(hsa-miR-452)", " ", " ", Table[{i, " "}, {i, 4, 14, 2}],
  {"(h) Xq Probelet (Coeff.)", "miR-452"}, patientFile, " ", Left, " ", colors];
figL = GraphicsGrid[{{g1, g2, g3}, {g4, g5}, {g6, g7, g8}}, ImageSize -> 750, Spacings -> {-67, 0}]
```

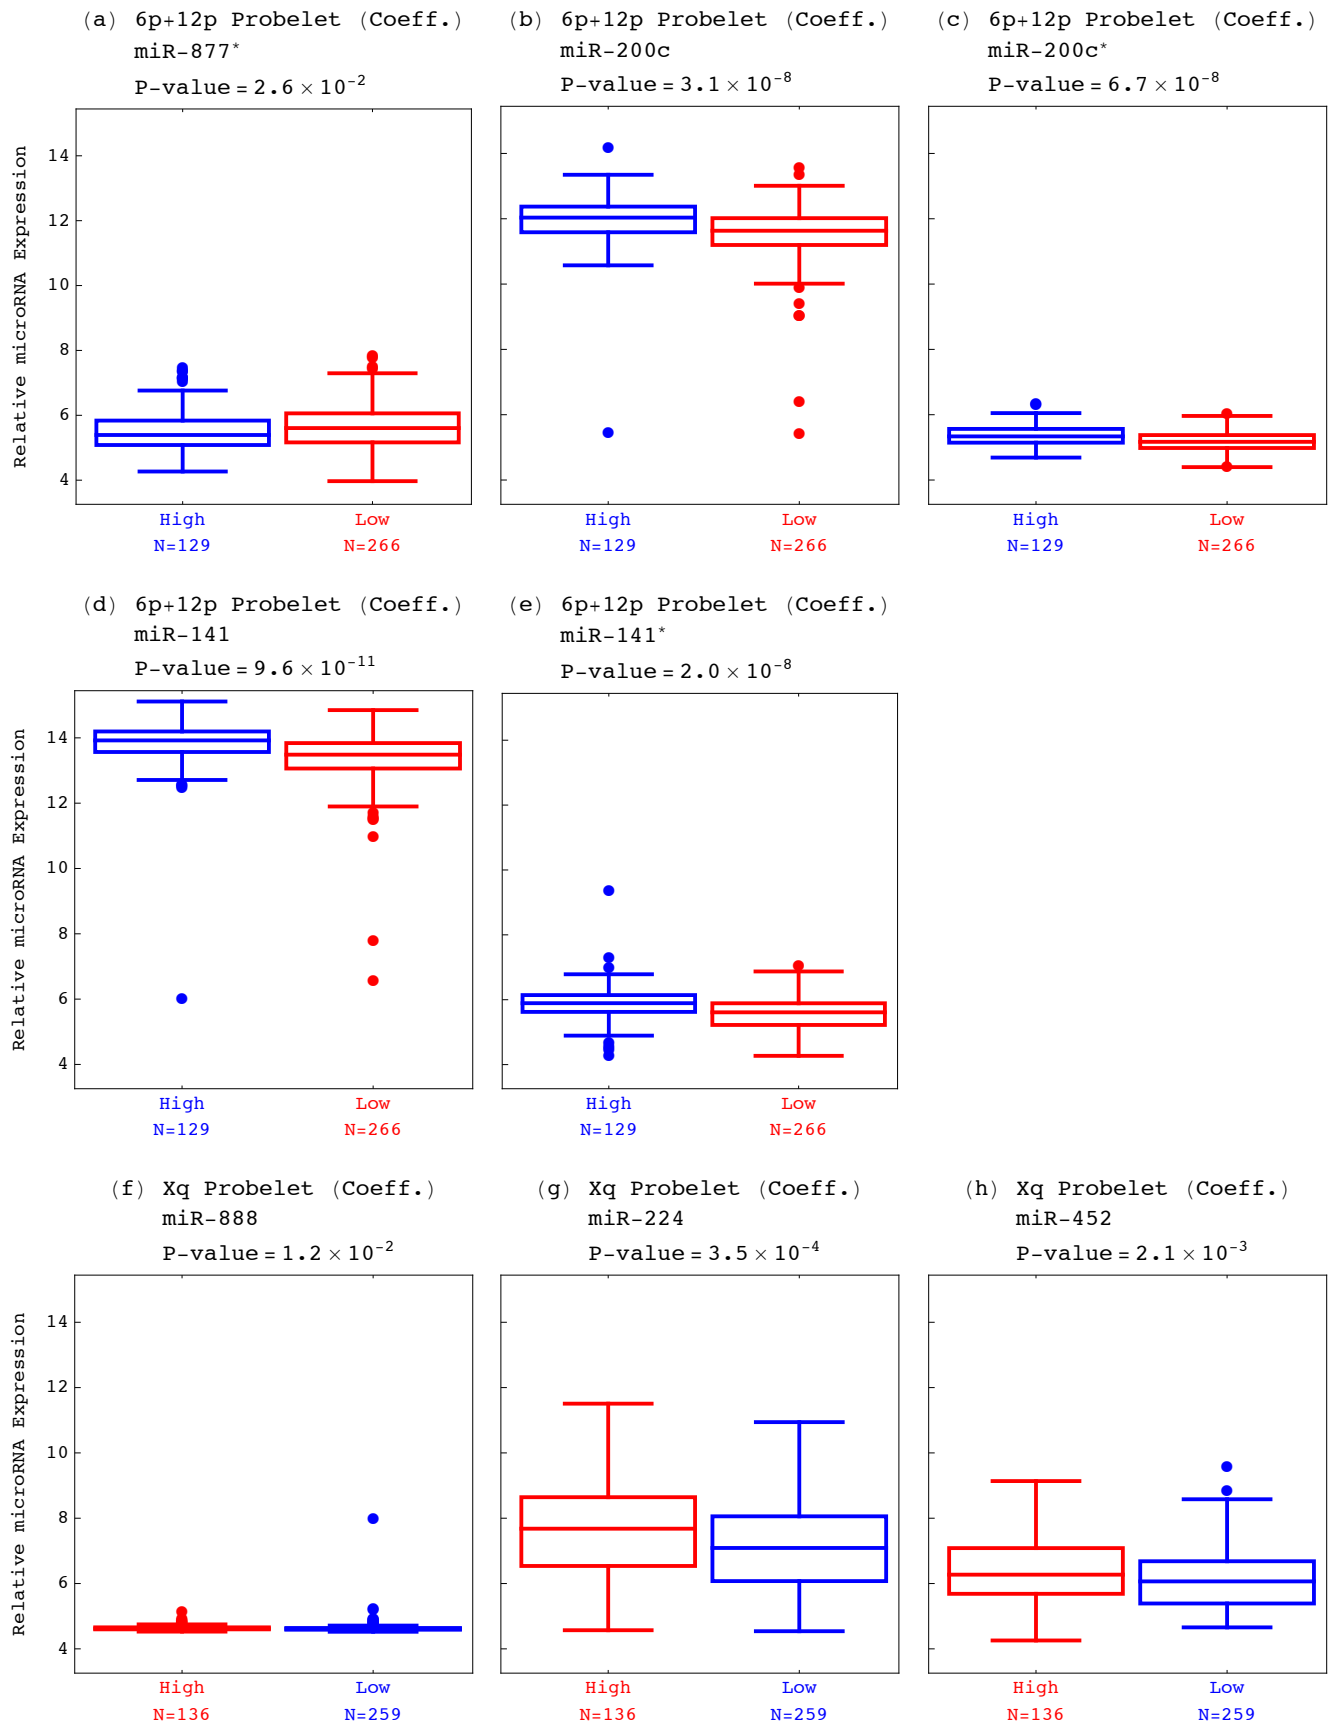

Export[path <> "Figure\_L.pdf", figL, "PDF", ImageSize -> 750];

```
(* Display Differential Protein Expression *)
```

```
minval = -2.5;  
maxval = 1.5;  
colors = {RGBColor[0, 0, 1], RGBColor[1, 0, 0], RGBColor[0, 0, 0], RGBColor[0, 1, 0]};  
g1 = plotBarChart[minval, maxval,  
  "Probelet_6p+12p_(Coeff.)", "Low", "High", "Protein_(MAPK14)", " ",  
  "Relative Protein Expression", Table[{i, ToString[i]}, {i, -2, 1, 1}],  
  {"(a) 6p+12p Probelet (Coeff.)", "MAPK14"}, patientFile, " ", Left, " ", colors];  
g2 = plotBarChart[minval, maxval, "Probelet_6p+12p_(Coeff.)", "Low",  
  "High", "Protein_(CDKN1B)", " ", " ", Table[{i, " "}, {i, -2, 1, 1}],  
  {"(b) 6p+12p Probelet (Coeff.)", "CDKN1B"}, patientFile, " ", Left, " ", colors];  
figM = GraphicsGrid[{{g1, g2}}, ImageSize -> 500, Spacings -> {-70, 0}]
```

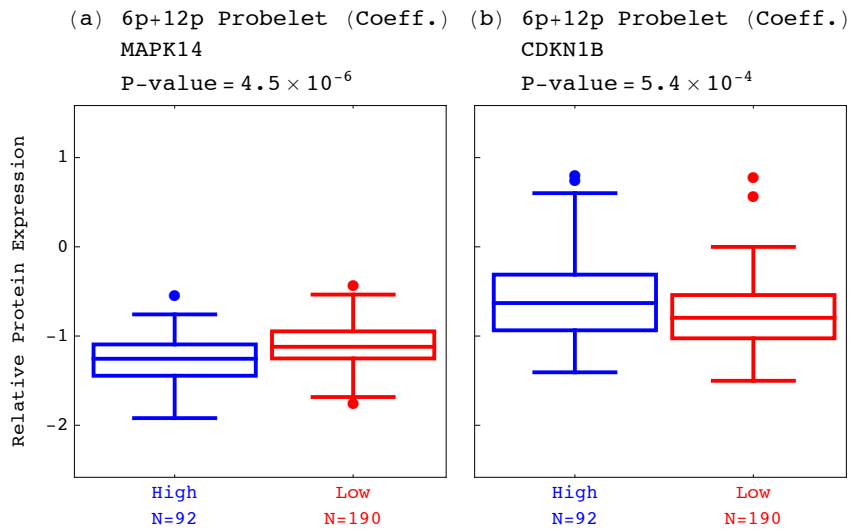

```
Export[path <> "Figure_M.pdf", figM, "PDF", ImageSize -> 500];
```

```
(* Display Tensor GSVD of Patient- and Platform-Matched Tumor and Normal aCGH Datasets *)
```

```
(* Create a Raster *)
```

```
rasterFileGeneration[Data_, rastercontrast_] := Module[{probes, meanData, arrays, raster}, (  
  probes = Dimensions[Data][[1]];   
  meanData = Table[Mean[Data[[a ;; a + step - 1]]], {a, 1, Floor[probes, step], step}];   
  {probes, arrays} = Dimensions[meanData];   
  raster = Table[If[meanData[[a, b]] > 0, {meanData[[a, b]], 0, 0}, {0, -meanData[[a, b]], 0}],   
    {a, probes, 1, -1}, {b, 1, arrays}] * rastercontrast;   
  raster   
  )]
```

```
(* Fit the Raster in a Display *)
```

```
coordinateChange[a1_, b1_, a2_, b2_, list_] :=   
  Module[{z}, (z = N[(list - a1) * (b2 - a2) / (b1 - a1) + a2];   
    z   
  )]
```

```
(* Define the Datasets' Label Coordinates *)
```

```
figureVariables[armBandCoordinates_, arm_, probes_, sample_, currentarm_: ""] :=  
Module[{armBands, armValue, xcoordinates, list, bands, indices, num, t, tickpos, xticks,  
patients, patientsString, z, patientLabels, bandLabels, yPosPosition}, {armValue = arm;  
armBands = armBandCoordinates;  
armBands[[2 ;;, 2]] = armBands[[2 ;;, 2]] + 1;  
armBands[[2 ;;, 3]] = armBands[[2 ;;, 3]] + 1;  
If[currentarm == "6p+12p", {armBands = armBandCoordinates[[1 ;; 20]];  
armValue = arm[[1 ;; Position[arm[[All, 1]], 6][[-1]][[1]]]];  
xcoordinates = Range[Length[armValue]];  
list = Transpose[Join[{xcoordinates}, {armValue[[All, -1]]}]];  
bands = Range[Length[armBands]];  
indices = Flatten[Map[(num = #;  
Position[armValue[[All, 3]], _? (# ≤ armBands[[num, 3]] &)[[-1]]) &  
Range[2, Length[armBands]]]];  
indices = DeleteDuplicates[indices];  
tickpos =  
Map[If[# ≠ 1, Floor[(indices[[# - 1]] + 1) / step], 0] &, Range[Length[indices]]];  
xticks = Transpose[Join[{tickpos}, {Map["" &, Range[Length[tickpos]]}],  
{Table[{0, 0.05}, {Length[tickpos]}]}]];  
armBands = Join[{armBandCoordinates[[1]]}, armBandCoordinates[[21 ;;]]];  
armValue = arm[[Position[arm[[All, 1]], 12][[1]][[1]] ;;];  
xcoordinates = Range[Length[armValue]];  
list = Transpose[Join[{xcoordinates}, {armValue[[All, -1]]}]];  
bands = Range[Length[armBands]]; indices = Flatten[Map[(num = #;  
Position[armValue[[All, 3]], _? (# ≤ armBands[[num, 3]] &)[[-1]]) &  
Range[2, Length[armBands]]]]; indices = DeleteDuplicates[indices];  
tickpos = Map[If[# ≠ 1, Floor[(indices[[# - 1]] + 1) / step], 0] &, Range[Length[indices]]];  
xticks = Join[xticks, Transpose[Join[{tickpos},  
{Map["" &, Range[Length[tickpos]]}], {Table[{0, 0.05}, {Length[tickpos]}]}]];  
xticks[[20 ;;, 1]] = xticks[[20 ;;, 1]] + (Position[arm[[All, 1]], 6][[-1]][[1]] / step);  
{xcoordinates = Range[Length[arm]};  
list = Transpose[Join[{xcoordinates}, {arm[[All, -1]]}]];  
bands = Range[Length[armBands]]; indices = Flatten[Map[(num = #;  
Position[arm[[All, 2]], _? (# ≤ armBands[[num, 3]] &)[[-1]]) &  
Range[2, Length[armBands]]]]; indices = DeleteDuplicates[indices];  
tickpos = Map[If[# ≠ 1, Floor[(indices[[# - 1]] + 1) / step], 0] &, Range[Length[indices]]];  
xticks = Transpose[Join[{tickpos}, {Map["" &, Range[Length[armBands] - 1]}],  
{Table[{0, 0.05}, {Length[armBands] - 1}]}]];];  
patients = {1, 50, 100, 150, 200};  
patientsString = {"1 ", "50 ", "100", "150", "200"};  
z = coordinateChange[1, 249, 13, 26, patients];  
If[sample == "Tumor", patientLabels =  
Map[Text[Style[patientsString[[#]], FontFamily → "Courier", FontSize → ticksize],  
{z[[#]], 40.5 + 13}, {0, 0}, {0, 1}] &, Range[Length[patients]]];, patientLabels =  
Map[Text[Style[patientsString[[#]], FontFamily → "Courier", FontSize → ticksize],  
{z[[#]], 38 + 13 - yspace + 2.5}, {0, 0}, {0, 1}] &, Range[Length[patients]]];];  
If[sample == "Tumor", z = (-1) * coordinateChange[0, probes, -25, 50, xticks[[All, 1]]];,  
z = coordinateChange[0, probes, 25 - yspace, -65 - yspace, xticks[[All, 1]]];];  
xticks[[All, 1]] = z;  
If[currentarm == "6p+12p", {t = Join[Range[19], Range[12]];  
bandLabels = Map[Text[Style[ToString[t[[#]]], FontFamily → "Courier",  
FontSize → ticksize], {-1.25, z[[#]]}, {1, 0}] &, Range[Length[t]]];,  
bandLabels = Map[Text[Style[ToString[#], FontFamily → "Courier", FontSize → ticksize],  
{-1.25, z[[#]]}, {1, 0}] &  
Range[Length[xticks]]];]; yPosPosition = bandLabels[[All, 2]];  
{bandLabels, patientLabels, xticks, yPosPosition, z}  
]]
```

```
(* Define the Datasets Display *)
```

```
tensorDisplay[raster1_, raster2_, bandLabels_, yPosition_, xticks_,  
patientLabels_, sample_] := Module[{gtensor}, (If[sample == "Tumor", (  
  (* Display the Tumor Datasets *)  
  gtensor =  
    {raster1, raster2, Graphics[Line[{{0, 25}, {0, -50}, {13, -50}, {13, 25}, {0, 25}}]],  
      Graphics[Line[{{13, 38 + 13}, {13, -37 + 13}, {26, -37 + 13}, {26, 38 + 13},  
        {13, 38 + 13}}]], Graphics[Line[{{0, 25}, {13, 38 + 13}}]],  
      Graphics[{White, Dashed, Line[{{13, 25}, {26, 38 + 13}}]]],  
      Graphics[{White, Thin, Line[{{13, -50 + 26}, {13, 25}}]]],  
      Graphics[Line[{{13, -50}, {26, -37 + 13}}]], Graphics[Line[{{0, 25}, {-2, 25 + 2}}]],  
      Graphics[Text[StyleForm["I", FontSize → 10], {-3, 25 + 3.5}, {0, 0}]],  
      Graphics[Text[StyleForm["!\(\(*TagBox[\(II\),  
        DisplayForm]\)", FontSize → 10], {-3.5 + 13, 38 + 13 + 3.5}, {0, 0}]], Graphics[  
        Text[Subscript[StyleForm[" $\mathcal{D}$ ", FontSize → 12], StyleForm["tumor", FontSize → 8]],  
          {19.5, 43 + 13 + 4}, {0, 0}]], Graphics[Line[{{13, 38 + 13}, {13 - 2, 38 + 13 + 2}}]],  
      Graphics[Text["Platforms", {(6.5 / 2) + (6.5 / 2) - 5, 39 + 3}, {0, 0}, {1, 2}]],  
      Graphics[Text["Arrays", {19.5, 43 + 13.5}], Graphics[  
        Text["Tumor Probes", {-5.5, 25 - 13 + 6.5 - 2}, {0, 0}, {0, 1}]], Graphics[bandLabels],  
      Map[Graphics[{Line[{{0, yPosition[#, 2]}], {-0.75, yPosition[#, 2]}]}] &,  
        Range[Length[xticks]]], Graphics[patientLabels],  
      Map[Graphics[{Line[{{patientLabels[#, 2]}[[1]], 38 + 13}, {patientLabels[#, 2]}[[  
        1]], 38.75 + 13}]}] &, Range[Length[patientLabels]]];), (  
  (* Display the Normal Datasets *)  
  gtensor = {raster1, raster2,  
    Graphics[Line[{{0, 25 - yspace}, {0, -65 - yspace}, {13, -65 - yspace}, {13, 25 - yspace},  
      {0, 25 - yspace}}]], Graphics[Line[{{13, 38 + 13 - yspace}, {13, -52 + 13 - yspace},  
      {26, -52 + 13 - yspace}, {26, 38 + 13 - yspace}, {13, 38 + 13 - yspace}}]],  
    Graphics[{White, Thin, Line[{{13, 25 - yspace}, {13, -52 + 13 - yspace}}]}],  
    Graphics[Line[{{0, 25 - yspace}, {13, 38 + 13 - yspace}}]],  
    Graphics[{White, Dashed, Line[{{13, 25 - yspace}, {26, 38 + 13 - yspace}}]}],  
    Graphics[Line[{{13, -65 - yspace}, {26, -52 + 13 - yspace}}]],  
    Graphics[Line[{{0, 25 - yspace}, {-2, 25 + 2 - yspace}}]],  
    Graphics[Text[StyleForm["I", FontSize → 10], {-3, 25 + 3.5 - yspace}, {0, 0}]],  
    Graphics[Text[StyleForm["!\(\(*TagBox[\(II\),  
      DisplayForm]\)", FontSize → 10], {-3.5 + 13, 38 + 13 + 3.5 - yspace}, {0, 0}]],  
    Graphics[Text[Subscript[StyleForm[" $\mathcal{D}$ ", FontSize → 12],  
      StyleForm["normal", FontSize → 8]], {19.5, 43 + 13 + 4 - yspace}, {0, 0}]],  
    Graphics[Line[{{13, 38 + 13 - yspace}, {13 - 2, 38 + 13 + 2 - yspace}}]],  
    Graphics[Text["Platforms", {(6.5 / 2) + (6.5 / 2) - 5, 39 + 3 - yspace}, {0, 0}, {1, 2}]],  
    Graphics[Text["Arrays", {19.5, 43 + 13.5 - yspace}], Graphics[Text["Normal Probes",  
      {-5.5, 25 - 13 + 6.5 - 5 - yspace}, {0, 0}, {0, 1}]], Graphics[patientLabels],  
    Map[Graphics[{Line[{{patientLabels[#, 2]}[[1]], 38 + 13 - yspace},  
      {patientLabels[#, 2]}[[1]], 38.75 + 13 - yspace}]}] &,  
      Range[Length[patientLabels]]], Graphics[bandLabels],  
    Map[Graphics[{Line[{{0, yPosition[#, 2]}], {-0.75, yPosition[#, 2]}]}] &,  
      Range[Length[xticks]]];););  
gtensor  
)]
```

```
(* Define the Arraylets' Label Coordinates *)
```

```
arrayletVariables[zArraylets_, bandLabels_, sample_] :=  
Module[{probes, arrays, arrayletRaster, arrayletDisplay, rasterArraylets,  
bandLabelCoordinates, bandLabelsArraylets, arrayletylblpos, arrayletylbls,  
ylist, yliststring}, ({probes, arrays} = Dimensions[zArraylets];  
arrayletDisplay = zArraylets[[All, Join[Range[1, 10], Range[arrays - 9, arrays]]]];  
arrayletRaster = rasterFileGeneration[arrayletDisplay, rastercontrast];  
If[sample == "Tumor",  
rasterArraylets = Graphics[Raster[arrayletRaster, {{space, -50}, {space + (13 * 2), 25}},  
ColorFunction -> RGBColor]]; rasterArraylets = Graphics[Raster[arrayletRaster,  
{{space, -65 - yspace}, {space + (13 * 2), 25 - yspace}}, ColorFunction -> RGBColor]];  
bandLabelsArraylets = bandLabels;  
bandLabelCoordinates = bandLabelsArraylets[[All, 2]];  
bandLabelCoordinates[[All, 1]] = bandLabelCoordinates[[All, 1]] + space;  
bandLabelsArraylets[[All, 2]] = bandLabelCoordinates;  
arrayletylblpos = {{space + 0.65, 25}, {space + (4 * 1.3) + 0.65, 25}, {space + 13 - 0.65, 25},  
{space + 13 + 0.65, 25}, {(space + 26) - (4 * 1.3) - 0.65, 25}, {space + 26 - 0.65, 25}};  
If[sample != "Tumor", arrayletylblpos[[All, 2]] = arrayletylblpos[[All, 2]] - yspace];  
ylist = {1, 5, 10, 240, 245, 249};  
yliststring = {"1 ", "5 ", "10 ", "489", "494", "498"};  
arrayletylbls =  
Map[Text[Style[yliststring[[#]], FontFamily -> "Courier", FontSize -> ticksize],  
{arrayletylblpos[[#]][[1]], arrayletylblpos[[#]][[2]] + 2.5},  
{0, 0}, {0, 1}] &, Range[Length[ylist]]];  
{rasterArraylets, bandLabelsArraylets, arrayletylbls, arrayletylblpos}  
)]
```

```
(* Define the Arraylets Display *)
```

```
arrayletsDisplay[rasterArraylets_, bandLabelsArraylets_, arrayletylbls_, arrayletylblpos_,  
xticks_, yPosition_, sample_] := Module[{gzarraylets}, (If[sample == "Tumor", (  
(* Display the Tumor Arraylets *)  
gzarraylets = {rasterArraylets, Graphics[Line[{{space, 25},  
{space, -50}, {space + (13 * 2), -50}, {space + (13 * 2), 25}, {space, 25}]]],  
Graphics[{White, Line[{{space + 13, 25}, {space + 13, -50}]}]],  
Graphics[Line[{{space, 25}, {space - 2, 25 + 2}]]],  
Graphics[Text[StyleForm["!\(\(*TagBox[SubscriptBox[\(U\), \(\textit{tumor}\)],  
DisplayForm]\)", FontSize -> 12], {space - 2.5, 25 + 4}, {0, 0}]],  
Graphics[Text["Arraylets", {space + 13, 30.5}]],  
Graphics[Text["Tumor Probes", {space - 5.5, 25 - 13 + 6.5 - 2}, {0, 0}, {0, 1}]],  
Graphics[bandLabelsArraylets], Map[Graphics[{Line[{{space, yPosition[[#, 2]]},  
{space - 0.75, yPosition[[#, 2]}]}]] &, Range[Length[xticks]]],  
Graphics[arrayletylbls],  
Map[Graphics[{Line[#, {#[[1]], #[[2]] + 0.75}]}]] &, arrayletylblpos}}]; (  
(* Display the Normal Arraylets *)  
gzarraylets =  
{rasterArraylets, Graphics[Line[{{space, 25 - yspace}, {space, -65 - yspace},  
{space + (13 * 2), -65 - yspace}, {space + (13 * 2), 25 - yspace}, {space, 25 - yspace}]]],  
Graphics[{White, Line[{{space + 13, 25 - yspace}, {space + 13, -65 - yspace}]}]],  
Graphics[Line[{{space, 25 - yspace}, {space - 2, 25 + 2 - yspace}]]],  
Graphics[Text[StyleForm["!\(\(*TagBox[SubscriptBox[\(U\), \(\textit{normal}\)],  
DisplayForm]\)", FontSize -> 12], {space - 2.5, 25 + 4 - yspace}, {0, 0}]],  
Graphics[Text["Arraylets", {space + 13, 30.5 - yspace}]],  
Graphics[Text["Normal Probes", {space - 5.5, 25 - 13 + 6.5 - 4 - yspace}, {0, 0}, {0, 1}]],  
Graphics[bandLabelsArraylets], Map[Graphics[{Line[{{space, yPosition[[#, 2]]},  
{space - 0.75, yPosition[[#, 2]}]}]] &, Range[Length[xticks]]],  
Graphics[arrayletylbls],  
Map[Graphics[{Line[#, {#[[1]], #[[2]] + 0.75}]}]] &, arrayletylblpos}}];  
gzarraylets  
)]
```



```
(* Define the Cores' Label Coordinates *)
```

```
coreVariables[core_, rastercontrast_, sample_] :=  
Module[{core1, core2, core1Display, core2Display, probes,  
arrays, coreRaster1, coreRaster2, corexlblpos, corexlbls, coreylblpos,  
coreylbls, xliststring, xlist, ylist}, (core1 = core[[All, All, 1]];  
core2 = core[[All, All, 2]];  
{probes, arrays} = Dimensions[core1];  
core1Display = core1[[Join[Range[1, 10], Range[probes - 9, probes]],  
Join[Range[1, 5], Range[arrays - 4, arrays]]]];  
core2Display = core2[[Join[Range[1, 10], Range[probes - 9, probes]],  
Join[Range[1, 5], Range[arrays - 4, arrays]]]];  
coreRaster1 = rasterFileGeneration[core1Display, rastercontrast];  
coreRaster2 = rasterFileGeneration[core2Display, rastercontrast];  
corexlblpos = {{space + 13 + (0.325 * 2), 38 + 13}, {space + 13 + (4 * 0.65 * 2) + (0.325 * 2),  
38 + 13}, {space + 13 + 6.5 + 0.65, 38 + 13}, {space + 26 - (0.325 * 2), 38 + 13}};  
If[sample ≠ "Tumor", corexlblpos[[All, 2]] = (corexlblpos[[All, 2]] - yspace);];  
xlist = {1, 5, 244, 249};  
xliststring = {"1", "5", "245", "249"};  
corexlbls = Map[Text[Style[ToString[xliststring[[#]]], FontFamily → "Courier",  
FontSize → ticksize], {corexlblpos[[#]][[1]], corexlblpos[[#]][[2]] + 2.5},  
{0, 0}, {0, 1}] &, Range[Length[xlist]]];  
coreylblpos = {{space, 25 - 0.65}, {space, 25 - (4 * 1.3) - 0.65}, {space, 25 - 13 + 0.65},  
{space, 25 - 13 - 0.65}, {space, 25 - 13 - (5 * 1.3) - 0.65}, {space, -1 + 0.65}};  
If[sample ≠ "Tumor", coreylblpos[[All, 2]] = (coreylblpos[[All, 2]] - yspace);];  
ylist = {"1", "5", "10", "489", "494", "498"};  
coreylbls = Map[Text[Style[ylist[[#]], FontFamily → "Courier", FontSize → ticksize],  
{coreylblpos[[#]][[1]] - 1.25, coreylblpos[[#]][[2]]}, {1, 0}] &,  
Range[Length[ylist]]];  
{coreRaster1, coreRaster2, corexlbls, corexlblpos, coreylbls, coreylblpos, xlist, ylist}  
)]
```

```
(* Define the Cores Display *)
```

```
coreDisplay[coreRaster1_, coreRaster2_, corexlbls_, corexlblpos_, coreylbls_,  
  coreylblpos_, xlist_, ylist_, sample_] := Module[{gcore}, (If[sample == "Tumor", (  
  (* Display the Tumor Core *)  
  gcore = {Graphics[Raster[coreRaster1, {{space, 12 - 13}, {space + 13, 25}},  
    ColorFunction → RGBColor]], Graphics[Raster[coreRaster2,  
    {{space + 13, 25}, {space + 26, 38 + 13}}, ColorFunction → RGBColor]], Graphics[Line[  
    {{space, 25}, {space, 12 - 13}, {space + 13, 12 - 13}, {space + 13, 25}, {space, 25}]]],  
  Graphics[Line[{{space + 13, 38 + 13}, {space + 13, 25}, {space + 26, 25},  
    {space + 26, 38 + 13}, {space + 13, 38 + 13}]]],  
  Graphics[Line[{{space, 25}, {space + 13, 38 + 13}]]],  
  Graphics[{White, Line[{{space, 25 - 13}, {space + 13, 25 - 13}]]}],  
  Graphics[{White, Line[{{space + 13, 25 + 13}, {space + 26, 25 + 13}]]}],  
  Graphics[{White, Line[{{space + 6.5, 12 - 13}, {space + 6.5, 25}]]}],  
  Graphics[{White, Line[{{space + 13 + 6.5, 25}, {space + 13 + 6.5, 25 + 26}]]}],  
  Graphics[{White, Dashed, Line[{{space + 13, 25}, {space + 26, 38 + 13}]]}],  
  Graphics[Line[{{space + 13, 12 - 13}, {space + 26, 25}]]],  
  Graphics[Line[{{space, 25}, {space - 2, 25 + 2}]]],  
  Graphics[Text[StyleForm["1", FontSize → 10], {space - 3, 25 + 3}, {0, 0}]],  
  Graphics[Text[StyleForm["2", FontSize → 10], {space + 13 - 3, 38 + 13 + 3}, {0, 0}]],  
  Graphics[Line[{{space + 13, 38 + 13}, {space + 13 - 2, 38 + 13 + 2}]]],  
  Graphics[Text[Subscript[StyleForm[" $\mathcal{R}$ ", FontSize → 12],  
    StyleForm["tumor", FontSize → 8]], {space + 19.5, 43 + 13 + 4}, {0, 0}]],  
  Graphics[Text["x-Probelets", {space + 19.5, 43 + 13.5}]],  
  Graphics[Text["Arraylets", {space - 5.5, 25 - 13 + 6.5 - 2}, {0, 0}, {0, 1}]],  
  Graphics[Text["y-Probelets", {space + (6.5 / 2) + (6.5 / 2) - 5, 39 + 4}, {0, 0}, {1, 2}]],  
  Graphics[corexlbls], Map[Graphics[{Line[{{corexlblpos[[#]], {corexlblpos[[#]][[1]],  
    corexlblpos[[#]][[2]] + 0.75}]]}], &, Range[Length[xlist]]], Graphics[  
    coreylbls], Map[Graphics[{Line[{{coreylblpos[[#]], {coreylblpos[[#]][[1]] - 0.75,  
    coreylblpos[[#]][[2]]}]]}], &, Range[Length[ylist]]];), (  
  (* Display the Normal Core *)  
  gcore = {Graphics[Raster[coreRaster1, {{space, 12 - 13 - yspace}, {space + 13, 25 - yspace}},  
    ColorFunction → RGBColor]], Graphics[Raster[coreRaster2,  
    {{space + 13, 25 - yspace}, {space + 26, 38 + 13 - yspace}}, ColorFunction → RGBColor]],  
  Graphics[Line[{{space, 25 - yspace}, {space, 12 - 13 - yspace},  
    {space + 13, 12 - 13 - yspace}, {space + 13, 25 - yspace}, {space, 25 - yspace}]]],  
  Graphics[Line[{{space + 13, 38 + 13 - yspace}, {space + 13, 25 - yspace}, {space + 26,  
    25 - yspace}, {space + 26, 38 + 13 - yspace}, {space + 13, 38 + 13 - yspace}]]],  
  Graphics[Line[{{space, 25 - yspace}, {space + 13, 38 + 13 - yspace}]]],  
  Graphics[{White, Line[{{space, 25 - 13 - yspace}, {space + 13, 25 - 13 - yspace}]]}],  
  Graphics[{White, Line[{{space + 13, 25 + 13 - yspace}, {space + 26, 25 + 13 - yspace}]]}],  
  Graphics[{White, Line[{{space + 6.5, 12 - 13 - yspace}, {space + 6.5, 25 - yspace}]]}],  
  Graphics[{White,  
    Line[{{space + 13 + 6.5, 25 - yspace}, {space + 13 + 6.5, 25 + 26 - yspace}]]}], Graphics[  
    {White, Dashed, Line[{{space + 13, 25 - yspace}, {space + 26, 38 + 13 - yspace}]]}],  
  Graphics[Line[{{space + 13, 12 - 13 - yspace}, {space + 26, 25 - yspace}]]],  
  Graphics[Line[{{space, 25 - yspace}, {space - 2, 25 + 2 - yspace}]]], Graphics[  
    Text[StyleForm["1", FontSize → 10], {space - 3, 25 + 3 - yspace}, {0, 0}]], Graphics[  
    Text[StyleForm["2", FontSize → 10], {space + 13 - 3, 38 + 13 + 3 - yspace}, {0, 0}]],  
  Graphics[Line[{{space + 13, 38 + 13 - yspace}, {space + 13 - 2, 38 + 13 + 2 - yspace}]]],  
  Graphics[Text[Subscript[StyleForm[" $\mathcal{R}$ ", FontSize → 12],  
    StyleForm["normal", FontSize → 8]], {space + 19.5, 43 + 13 + 4 - yspace}, {0, 0}]],  
  Graphics[Text["x-Probelets", {space + 19.5, 43 + 13.5 - yspace}]], Graphics[  
    Text["Arraylets", {space - 5.5, 25 - 13 + 6.5 - 2 - yspace}, {0, 0}, {0, 1}]], Graphics[  
    Text["y-Probelets", {space + (6.5 / 2) + (6.5 / 2) - 5, 39 + 4 - yspace}, {0, 0}, {1, 2}]],  
  Graphics[corexlbls], Map[Graphics[{Line[{{corexlblpos[[#]], {corexlblpos[[#]][[1]],  
    corexlblpos[[#]][[2]] + 0.75}]]}], &, Range[Length[xlist]]], Graphics[  
    coreylbls], Map[Graphics[{Line[{{coreylblpos[[#]], {coreylblpos[[#]][[1]] - 0.75,  
    coreylblpos[[#]][[2]]}]]}], &, Range[Length[ylist]]];);]; gcore]
```

```
(* Define the y-Probelets' Label Coordinates *)
```

```
probeletVariables[yProbelets_, rastercontrast_, patientLabels_, sample_] :=
Module[{xlist, probeletlbl, probeletlabel, probeletxlblpos, probeletxlbls, yProbeletRaster},
(yProbeletRaster = Reverse[rasterFileGeneration[yProbelets, rastercontrast]];
probeletlbl = patientLabels;
probeletlabel = patientLabels[[All, 2]];
probeletlabel[[All, 1]] = probeletlabel[[All, 1]] + space;
probeletlabel[[All, 2]] = probeletlabel[[All, 2]] - 26;
probeletlbl[[All, 2]] = probeletlabel;
probeletxlblpos = {{space + 13, 25 - 0.65}, {space + 13, 25 - (4 * 1.3) - 0.65},
{space + 13, 25 - (5 * 1.3) - 0.65}, {space + 13, 25 - 13 + 0.65}};
If[sample ≠ "Tumor", probeletxlblpos[[All, 2]] = (probeletxlblpos[[All, 2]] - yspace)];
xlist = {1, 5, 245, 249};
probeletxlbls =
Map[Text[Style[ToString[xlist[[#]]], FontFamily → "Courier", FontSize → ticksize],
{probeletxlblpos[[#]][[1]] - 1.25, probeletxlblpos[[#]][[2]]},
{1, 0}] &, Range[Length[xlist]]];
{yProbeletRaster, probeletlbl, probeletxlblpos, probeletxlbls}
)]
```

```
(* Define the x-Probelets Display *)
```

```
xProbeletsDisplay[probeletsRaster_, probeletlbl_, probeletxlbls_,
probeletxlblpos_, sample_] := Module[{gxProbelets}, (If[sample == "Tumor", (
(* Display the x-Probelets in the Tumor Factorization *)
gxProbelets =
{Graphics[Raster[probeletsRaster, {{space + 13, 25 - 13}, {space + 26, 38 - 13}}]],
Graphics[{{RGBColor[0, 0, 0], {Line[{{space + 13, 38 - 13}, {space + 13, 25 - 13},
{space + 26, 25 - 13}, {space + 26, 38 - 13}, {space + 13, 38 - 13}}]}]},
Graphics[{{White, Line[{{space + 13, (25 - 13) + 6.5}, {space + 26, (25 - 13) + 6.5}}]}]},
Graphics[Line[{{space + 13, 38 - 13}, {space + 13 - 2, 38 + 2 - 13}}]],
Graphics[Text[StyleForm["\!\(\*\SubsuperscriptBox[\(V\), \(\x\), \(\mathbb{T}\)\]\)",
FontSize → 12], {space + 13 - 3, 38 + 4 - 13}, {0, 0}],
Graphics[Text["Arrays", {space + 19.5, 43.5 - 13}], Graphics[probeletlbl],
Map[Graphics[{{Line[{{probeletlbl[[#, 2]][[1]], 25},
{probeletlbl[[#, 2]][[1]], 25.75}}]}] &, Range[Length[probeletlbl]]],
Graphics[probeletxlbls],
Map[Graphics[{{Line[{{#, {#[[1]] - 0.75, #[[2]]}}]}] &, probeletxlblpos},
Graphics[Text["x-Probelets", {space + 13 - 5.5, 25 - 13 + 6.5}, {0, 0}, {0, 1}]]];), (
(* Display the x-Probelets in the Normal Factorization *)
gxProbelets = {Graphics[
Raster[probeletsRaster, {{space + 13, 25 - 13 - yspace}, {space + 26, 38 - 13 - yspace}}]],
Graphics[{{RGBColor[0, 0, 0], {Line[{{space + 13, 38 - 13 - yspace},
{space + 13, 25 - 13 - yspace}, {space + 26, 25 - 13 - yspace},
{space + 26, 38 - 13 - yspace}, {space + 13, 38 - 13 - yspace}}]}]}, Graphics[{{White,
Line[{{space + 13, (25 - 13) + 6.5 - yspace}, {space + 26, (25 - 13) + 6.5 - yspace}}]}]},
Graphics[Line[{{space + 13, 38 - 13 - yspace}, {space + 13 - 2, 38 + 2 - 13 - yspace}}]],
Graphics[Text[StyleForm["\!\(\*\SubsuperscriptBox[\(V\), \(\x\), \(\mathbb{T}\)\]\)",
FontSize → 12], {space + 13 - 3, 38 + 4 - 13 - yspace}, {0, 0}],
Graphics[Text["Arrays", {space + 19.5, 43.5 - 13 - yspace}], Graphics[probeletlbl],
Map[Graphics[{{Line[{{probeletlbl[[#, 2]][[1]], 25 - yspace},
{probeletlbl[[#, 2]][[1]], 25.75 - yspace}}]}] &,
Range[Length[probeletlbl]]], Graphics[probeletxlbls],
Map[Graphics[{{Line[{{#, {#[[1]] - 0.75, #[[2]]}}]}] &, probeletxlblpos}, Graphics[
Text["x-Probelets", {space + 13 - 5.5, 25 - 13 + 6.5 - yspace}, {0, 0}, {0, 1}]]];);
gxProbelets
)]
```

(\* Define the y-Probelets Display \*)

```

yProbeletsDisplay[yProbeletRaster_, sample_] := Module[{gyProbelets}, (If[sample == "Tumor", (
  (* Display the y-Probelets in the Tumor Factorization *)
  gyProbelets = {Graphics[{RGBColor[yProbeletRaster[[1, 1]]],
    Polygon[{{space + 13, 41.25 + 6.5}, {space + 13 + 6.5, 41.25 + 13},
      {space + 13 + 6.5, 41.25 + 13 + 6.5}, {space + 13, 41.25 + 13}}]}],
    Graphics[{RGBColor[yProbeletRaster[[1, 2]]], Polygon[
      {{space + 13 + 6.5, 41.25 + 13}, {space + 13 + 13, 41.25 + 13 + 6.5},
        {space + 13 + 13, 41.25 + 13 + 13}, {space + 13 + 6.5, 41.25 + 13 + 6.5}}]}],
    Graphics[{RGBColor[yProbeletRaster[[2, 1]]], Polygon[{{space + 13, 41.25},
      {space + 13 + 6.5, 41.25 + 6.5}, {space + 13 + 6.5, 41.25 + 13},
        {space + 13, 41.25 + 6.5}}]}], Graphics[{RGBColor[yProbeletRaster[[2, 2]]],
      Polygon[{{space + 13 + 6.5, 41.25 + 6.5}, {space + 13 + 13, 41.25 + 13},
        {space + 13 + 13, 41.25 + 13 + 6.5}, {space + 13 + 6.5, 41.25 + 13}}]}],
    Graphics[Line[{{space + 13, 41.25 + 13}, {space + 13 - 2, 41.25 + 13 + 2}}]],
    Graphics[{EdgeForm[{RGBColor[0, 0, 0]}], FaceForm[], Polygon[{{space + 13, 41.25},
      {space + 26, 41.25 + 13}, {space + 26, 41.25 + 26}, {space + 13, 41.25 + 13}}]}],
    Graphics[Text[StyleForm["\!\!\(*SubsuperscriptBox[\(V\), \(\mathit{y}\), \(\mathit{T}\)]\)\)",
      FontSize → 12], {space + 13 - 3, 41.25 + 13 + 4}, {0, 0}], Graphics[
      Text["Platforms", {space + 13 + 6.5 / 2, 41.25 + 1.5 + 26 - 6.5 / 2}, {0, 0}, {1, 1}],
      Graphics[Text["y-Probelets", {space + 13 - 5.5, 25 - 4.25 + 26}, {0, 0}, {0, 1}]]];), (
  (* Display the y-Probelets in the Normal Factorization *)
  gyProbelets = {Graphics[{RGBColor[yProbeletRaster[[1, 1]]],
    Polygon[{{space + 13, 41.25 + 6.5 - yspace}, {space + 13 + 6.5, 41.25 + 13 - yspace},
      {space + 13 + 6.5, 41.25 + 13 + 6.5 - yspace}, {space + 13, 41.25 + 13 - yspace}}]}],
    Graphics[{RGBColor[yProbeletRaster[[1, 2]]], Polygon[{{space + 13 + 6.5,
      41.25 + 13 - yspace}, {space + 13 + 13, 41.25 + 13 + 6.5 - yspace}, {space + 13 + 13,
        41.25 + 13 + 13 - yspace}, {space + 13 + 6.5, 41.25 + 13 + 6.5 - yspace}}]}],
    Graphics[{RGBColor[yProbeletRaster[[2, 1]]], Polygon[
      {{space + 13, 41.25 - yspace}, {space + 13 + 6.5, 41.25 + 6.5 - yspace},
        {space + 13 + 6.5, 41.25 + 13 - yspace}, {space + 13, 41.25 + 6.5 - yspace}}]}],
    Graphics[{RGBColor[yProbeletRaster[[2, 2]]], Polygon[{{space + 13 + 6.5,
      41.25 + 6.5 - yspace}, {space + 13 + 13, 41.25 + 13 - yspace}, {space + 13 + 13,
        41.25 + 13 + 6.5 - yspace}, {space + 13 + 6.5, 41.25 + 13 - yspace}}]}], Graphics[
      Line[{{space + 13, 41.25 + 13 - yspace}, {space + 13 - 2, 41.25 + 13 + 2 - yspace}}]],
    Graphics[{EdgeForm[{RGBColor[0, 0, 0]}], FaceForm[],
      Polygon[{{space + 13, 41.25 - yspace}, {space + 26, 41.25 + 13 - yspace},
        {space + 26, 41.25 + 26 - yspace}, {space + 13, 41.25 + 13 - yspace}}]}],
    Graphics[Text[StyleForm["\!\!\(*SubsuperscriptBox[\(V\), \(\mathit{y}\), \(\mathit{T}\)]\)\)",
      FontSize → 12], {space + 13 - 3, 41.25 + 13 + 4 - yspace}, {0, 0}],
    Graphics[Text["Platforms", {space + 13 + 6.5 / 2, 41.25 + 1.5 + 26 - 6.5 / 2 - yspace},
      {0, 0}, {1, 1}], Graphics[Text["y-Probelets",
        {space + 13 - 5.5, 25 - 4.25 + 26 - yspace}, {0, 0}, {0, 1}]]];););
gyProbelets
)]

```

(\* Define the Equal Sign Display \*)

```

gEqualDisplay[sample_] := Module[{gEqual}, (If[sample == "Tumor",
  (gEqual = Graphics[Text[StyleForm["≈", FontSize → 30], {32.5, 25 - 13 + 6.5 - 2}]]);
  (gEqual =
    Graphics[Text[StyleForm["≈", FontSize → 30], {30.5, 25 - 13 + 6.5 - 2 - yspace}]]];);
gEqual
)]

```

```
(* Define the Angular Distances Bar Chart *)
```

```
angularDistance[tumorCore_, normalCore_] := Module[
  {tumorCore1, tumorCore2, normalCore1, normalCore2, arrays, a, b, distances, ylabel, framex,
  gridx, framey, gridy, labelx, labely, barsFull, barsInset}, (a = tumorCore / normalCore;
  arrays = 249 * 2;
  distances = Table[N[ArcTan[a[[b, 1]]] - Pi / 4], {b, 1, arrays}][[All, 1]];
  ylabel = {1, 50, 100, 150, 200, 250, 300, 350, 400, 450};
  gridx = {-Pi / 4, -Pi / 8, 0, Pi / 8, Pi / 4};
  framex = {"-Pi/4", "-Pi/8", "0", "Pi/8", "Pi/4"};
  framex = Table[{gridx[[a]], Style[Rotate[framex[[a]], Pi / 2]}], {a, 1, Length[framex]}];
  gridx = Table[{gridx[[a]], RGBColor[0, 0, 0]}, {a, 1, 5}];
  framey = Table[{arrays - ylabel[[a]], ylabel[[a]]}, {a, 1, Dimensions[ylabel][[1]]};
  labelx = Style["Angular Distance", FontSize -> 10];
  labely = Style["Arraylets", FontSize -> 10];
  barsFull = Show[BarChart[Reverse[distances], BarOrigin -> Left, ChartStyle -> Red,
  ChartBaseStyle -> EdgeForm[None], Axes -> False, PlotRange -> {{-0.8, 0.8}, Automatic},
  AspectRatio -> 1, ImageSize -> 300], Frame -> True, FrameTicks -> {None, framey, framex, None},
  FrameLabel -> {None, labely, labelx, None}, GridLines -> {{distances[[2]], None},
  GridLinesStyle -> Directive[Dashed], BaseStyle -> {FontFamily -> "Courier", FontSize -> 8}];
  barsInset = Graphics[Rectangle[{82 - 6.5, -65 - yspace},
  {space + 26, -65 - yspace + 50.25 + 7}, barsFull]];
  barsInset
)]
```

```
(* Compute the 6p+12p Tensor GSVD *)
```

```
(* Read the 6p+12p Datasets *)
```

```
tumor1 = Import[path <> "D_Tumor_1_6p+12p.txt", "Table"];  
tumor2 = Import[path <> "D_Tumor_2_6p+12p.txt", "Table"];  
normal1 = Import[path <> "D_Normal_1_6p+12p.txt", "Table"];  
normal2 = Import[path <> "D_Normal_2_6p+12p.txt", "Table"];  
arrayNames = tumor1[[1, 5 ;;]];  
tumorProbeID = tumor1[[2 ;;, 1]];  
tumorProbeLoc = tumor1[[2 ;;, 2 ;; 4]];  
normalProbeID = normal1[[2 ;;, 1]];  
normalProbeLoc = normal1[[2 ;;, 2 ;; 4]];  
tumor1 = Drop[tumor1, 1, 4];  
tumor2 = Drop[tumor2, 1, 4];  
normal1 = Drop[normal1, 1, 4];  
normal2 = Drop[normal2, 1, 4];
```

```
(* Compute the 6p+12p Tensor GSVD *)
```

```
{tumor1, tumor2, normal1, normal2, zTumorArraylets, zNormalArraylets, tumorCore,  
normalCore, xProbelets, yProbelets} = tGSVD[tumor1, tumor2, normal1, normal2];
```

```
(* Create the Rasters of the 6p+12p Tumor Datasets *)
```

```
labelsize = 12;  
yspace = 115;  
ticksize = 8;  
rastercontrast = 1;  
step = 5;
```

```
tumor1Raster = rasterFileGeneration[tumor1, rastercontrast];  
tumor2Raster = rasterFileGeneration[tumor2, rastercontrast];  
probes = Dimensions[tumor1Raster][[1]];
```

```
(* Input the 6p+12p Chromosome Band Coordinates *)
```

```
arm = Transpose[Join[Transpose[tumorProbeLoc], {zTumorArraylets[[All, 1]]}]];
armBands = {{{"#chrom", "chromStart", "chromEnd", "name"}, {"chr6", 0, 2 300 000, "p25.3"},
{"chr6", 2 300 000, 4 200 000, "p25.2"}, {"chr6", 4 200 000, 7 100 000, "p25.1"},
{"chr6", 7 100 000, 10 600 000, "p24.3"}, {"chr6", 10 600 000, 11 600 000, "p24.2"},
{"chr6", 11 600 000, 13 400 000, "p24.1"}, {"chr6", 13 400 000, 15 200 000, "p23"},
{"chr6", 15 200 000, 25 200 000, "p22.3"}, {"chr6", 25 200 000, 27 000 000, "p22.2"},
{"chr6", 27 000 000, 30 400 000, "p22.1"}, {"chr6", 30 400 000, 32 100 000, "p21.33"},
{"chr6", 32 100 000, 33 500 000, "p21.32"}, {"chr6", 33 500 000, 36 600 000, "p21.31"},
{"chr6", 36 600 000, 40 500 000, "p21.2"}, {"chr6", 40 500 000, 46 200 000, "p21.1"},
{"chr6", 46 200 000, 51 800 000, "p12.3"}, {"chr6", 51 800 000, 52 900 000, "p12.2"},
{"chr6", 52 900 000, 57 000 000, "p12.1"}, {"chr6", 57 000 000, 58 700 000, "p11.2"},
{"chr12", 0, 3 300 000, "p13.33"}, {"chr12", 3 300 000, 5 400 000, "p13.32"},
{"chr12", 5 400 000, 10 100 000, "p13.31"}, {"chr12", 10 100 000, 12 800 000, "p13.2"},
{"chr12", 12 800 000, 14 800 000, "p13.1"}, {"chr12", 14 800 000, 20 000 000, "p12.3"},
{"chr12", 20 000 000, 21 300 000, "p12.2"}, {"chr12", 21 300 000, 26 500 000, "p12.1"},
{"chr12", 26 500 000, 27 800 000, "p11.23"}, {"chr12", 27 800 000, 30 700 000, "p11.22"},
{"chr12", 30 700 000, 33 300 000, "p11.21"}, {"chr12", 33 300 000, 35 800 000, "p11.1"}];
```

```
{bandLabels, patientLabels, xticks, yPosition, z} =
figureVariables[armBands, arm, probes, "Tumor", "6p+12p"];
```

```
Map[(bandLabels[[#[[1]]]] =
Text[Style[ToString[#[[1]], FontFamily -> "Courier", FontSize -> ticksize],
{-1.25, #[[2]], {1, 0}}]; &,
{{5, z[[5]] + 0.25}, {6, z[[6]] - 0.25}, {7, z[[7]] + 0.25}, {8, z[[8]] - 0.25}}];
bandLabels[[20]] = Text[Style[ToString[1], FontFamily -> "Courier", FontSize -> ticksize],
{-1.25, z[[20]] - 0.5}, {1, 0}];
```

```
(* Display the 6p+12p Tumor Datasets *)
```

```
tumor1Raster = Graphics[Raster[tumor1Raster, {{0, -50}, {13, 25}}, ColorFunction -> RGBColor]];
tumor2Raster =
Graphics[Raster[tumor2Raster, {{13, -37 + 13}, {26, 38 + 13}}, ColorFunction -> RGBColor]];
```

```
gTumorTensor = tensorDisplay[tumor1Raster,
tumor2Raster, bandLabels, yPosition, xticks, patientLabels, "Tumor"];
```

```
(* Display the 6p+12p Tumor Arraylets *)
```

```
space = 43.5;
rastercontrast = 50;
step = 5;
{rasterArraylets, bandLabelsArraylets, arrayletylbls, arrayletylblpos} =
arrayletVariables[zTumorArraylets, bandLabels, "Tumor"];
```

```
gzTumorArraylets = arrayletsDisplay[rasterArraylets,
bandLabelsArraylets, arrayletylbls, arrayletylblpos, xticks, yPosition, "Tumor"];
```

```
(* Display the 6p+12p Tumor Core *)
```

```
rastercontrast = 0.01;
step = 1;
space = 82;
{coreRaster1, coreRaster2, corexbls, corexblpos, coreylbls, coreylblpos, xlist, ylist} =
coreVariables[tumorCore, rastercontrast, "Tumor"];
```

```
gTumorCore = coreDisplay[coreRaster1, coreRaster2,
corexbls, corexblpos, coreylbls, coreylblpos, xlist, ylist, "Tumor"];
```

```

(* Display the 6p+12p x- and y-Probelets *)

rastercontrast = 30;
step = 1;
{rows, columns} = Dimensions[xProbelets];
probeletsRaster = rasterFileGeneration[
  xProbelets[[Join[Range[1, 5], Range[rows - 4, rows]], All]], rastercontrast];

rastercontrast = 1;
step = 1;
space = 117 - 10.75;
{yProbeletRaster, probeletlbl, probeletxlblpos, probeletxlbls} =
  probeletVariables[yProbelets, rastercontrast, patientLabels, "Tumor"];

gxTumorProbelets =
  xProbeletsDisplay[probeletsRaster, probeletlbl, probeletxlbls, probeletxlblpos, "Tumor"];

gyTumorProbelets = yProbeletsDisplay[yProbeletRaster, "Tumor"];
gTumorEqual = gEqualDisplay["Tumor"];

(* Create Rasters of the 6p+12p Normal Datasets *)

rastercontrast = 1;
step = 5;

normal1Raster = rasterFileGeneration[normal1, rastercontrast];
normal2Raster = rasterFileGeneration[normal2, rastercontrast];
probes = Dimensions[normal1Raster][[1]];

(* Input the 6p+12p Chromosome Band Coordinates *)

arm = Transpose[Join[Transpose[normalProbeLoc], {zNormalArraylets[[All, 1]]}]];

{bandLabels, patientLabels, xticks, yPos, z} =
  figureVariables[armBands, arm, probes, "Normal", "6p+12p"];

Map[(bandLabels[[#[[1]]]] =
  Text[Style[ToString[#[[1]], FontFamily -> "Courier", FontSize -> ticksize],
    {-1.25, #[[2]], {1, 0}}]; &,
  {{5, z[[5]] + 0.25}, {6, z[[6]] - 0.25}, {7, z[[7]] + 0.25}, {8, z[[8]] - 0.25}}];
bandLabels[[20]] = Text[Style[ToString[1], FontFamily -> "Courier", FontSize -> ticksize],
  {-1.25, z[[20]] - 0.5}, {1, 0}];

(* Display the 6p+12p Normal Datasets *)

normal1Raster = Graphics[
  Raster[normal1Raster, {{0, -65 - yspace}, {13, 25 - yspace}}, ColorFunction -> RGBColor]];
normal2Raster = Graphics[Raster[normal2Raster,
  {{13, -52 + 13 - yspace}, {26, 38 + 13 - yspace}}, ColorFunction -> RGBColor]];

gNormalTensor = tensorDisplay[normal1Raster,
  normal2Raster, bandLabels, yPos, xticks, patientLabels, "Normal"];

```



```

(* Display the 6p+12p Normal Arraylets *)

space = 43.5;
rastercontrast = 50;
step = 5;
{rasterArraylets, bandLabelsArraylets, arrayletylbls, arrayletylblpos} =
  arrayletVariables[zNormalArraylets, bandLabels, "Normal"];

gzNormalArraylets = arrayletsDisplay[rasterArraylets,
  bandLabelsArraylets, arrayletylbls, arrayletylblpos, xticks, yPosition, "Normal"];

(* Display the 6p+12p Normal Core *)

rastercontrast = 0.01;
step = 1;
space = 82;
{coreRaster1, coreRaster2, corexlbls, corexlblpos, coreylbls, coreylblpos, xlist, ylist} =
  coreVariables[normalCore, rastercontrast, "Normal"];

gNormalCore = coreDisplay[coreRaster1, coreRaster2,
  corexlbls, corexlblpos, coreylbls, coreylblpos, xlist, ylist, "Normal"];

(* Display the 6p+12p x- and y-Probelets *)

rastercontrast = 30;
step = 1;
{rows, columns} = Dimensions[xProbelets];
probeletsRaster = rasterFileGeneration[
  xProbelets[[Join[Range[1, 5], Range[rows - 4, rows]], All]], rastercontrast];

rastercontrast = 1;
step = 1;
space = 117 - 10.75;
{yProbeletRaster, probeletlbl, probeletxlblpos, probeletxlbls} =
  probeletVariables[yProbelets, rastercontrast, patientLabels, "Normal"];

gxNormalProbelets =
  xProbeletsDisplay[probeletsRaster, probeletlbl, probeletxlbls, probeletxlblpos, "Normal"];

gyNormalProbelets = yProbeletsDisplay[yProbeletRaster, "Normal"];
gNormalEqual = gEqualDisplay["Normal"];

(* Display the 6p+12p Angular Distances Bar Chart *)

barsInset = angularDistance[tumorCore, normalCore];

(* Display the 6p+12p Tensor GSVD *)

fig1 = Show[{gTumorTensor, gTumorEqual, gzTumorArraylets,
  gTumorCore, gxTumorProbelets, gyTumorProbelets, gNormalTensor, gNormalEqual,
  gzNormalArraylets, gNormalCore, gxNormalProbelets, gyNormalProbelets, barsInset},
  PlotRange → All, ImageSize → 750, AspectRatio → Automatic]

```

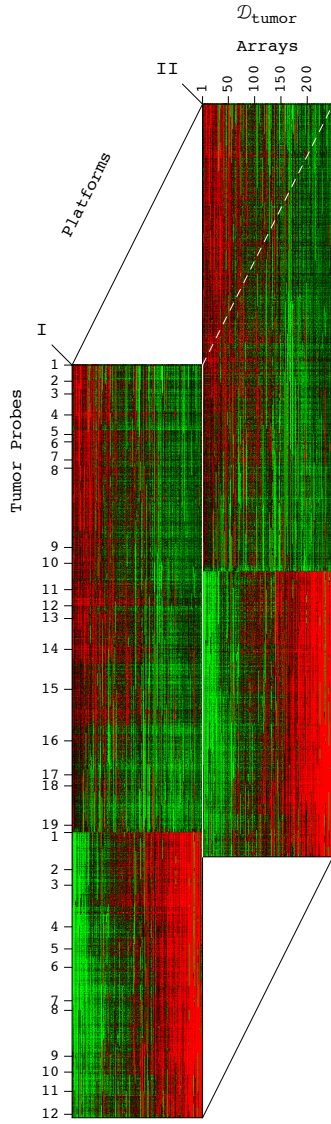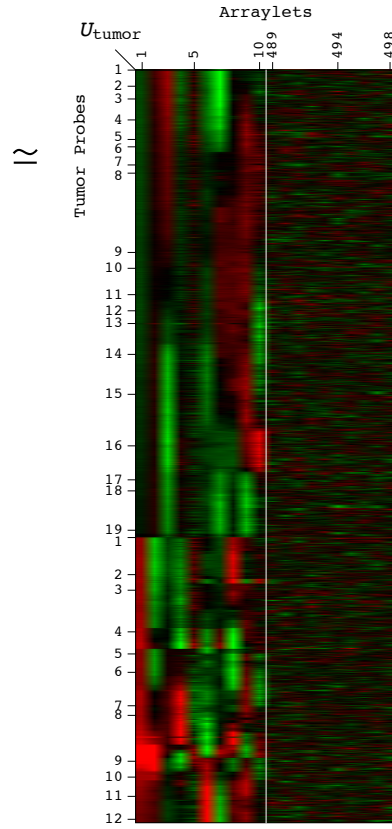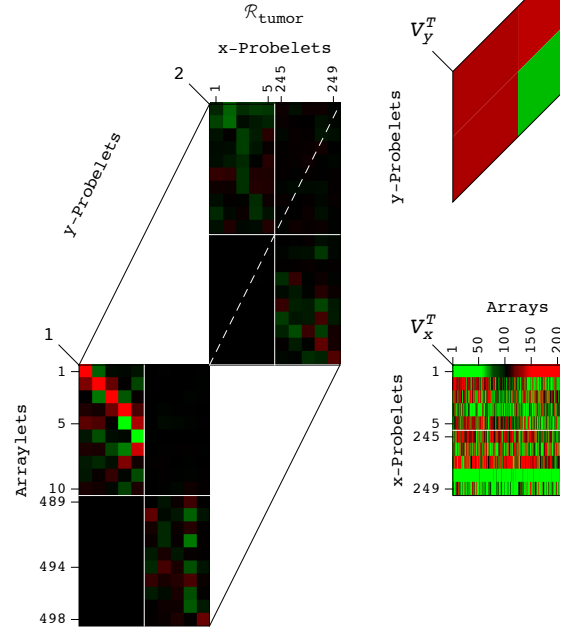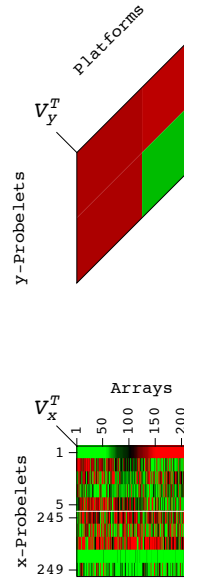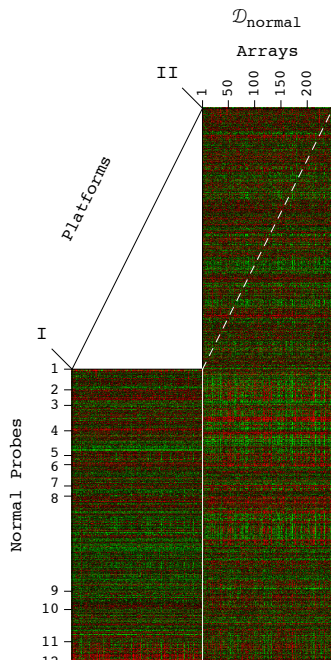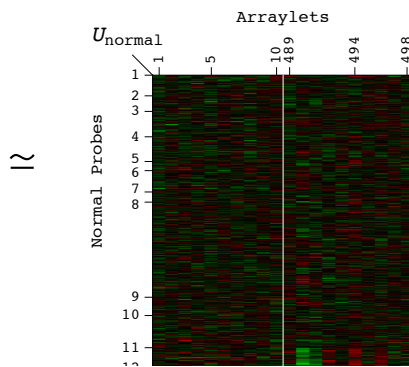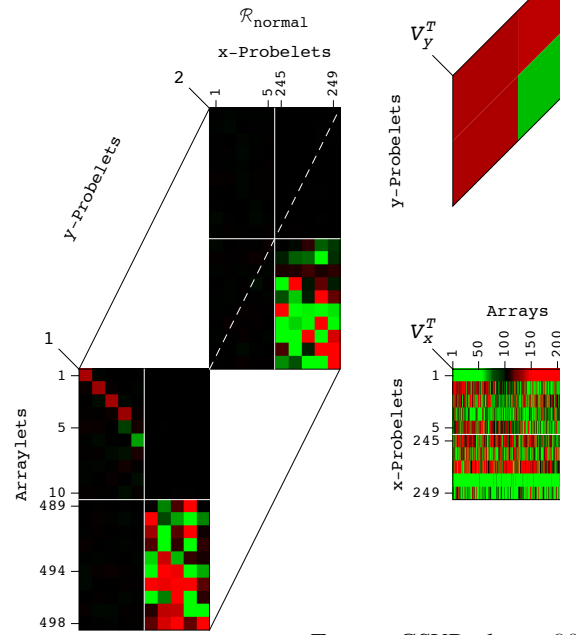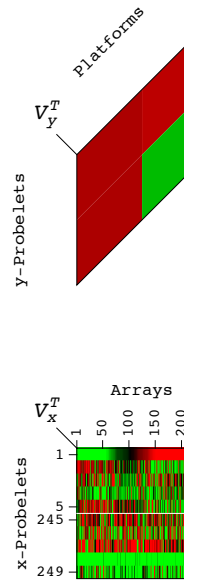

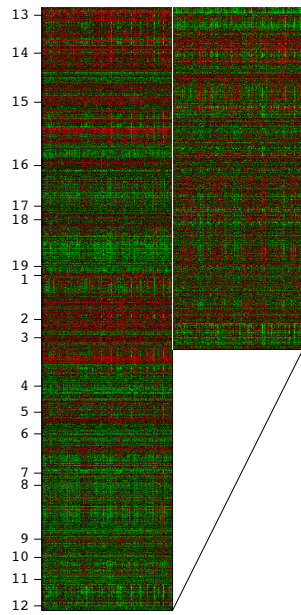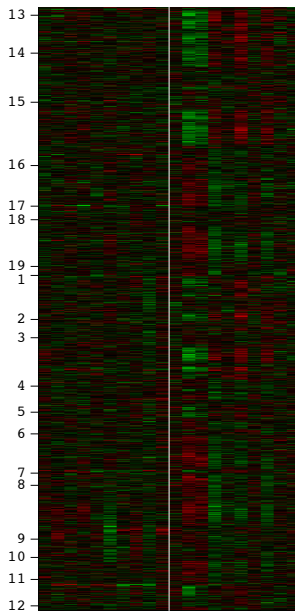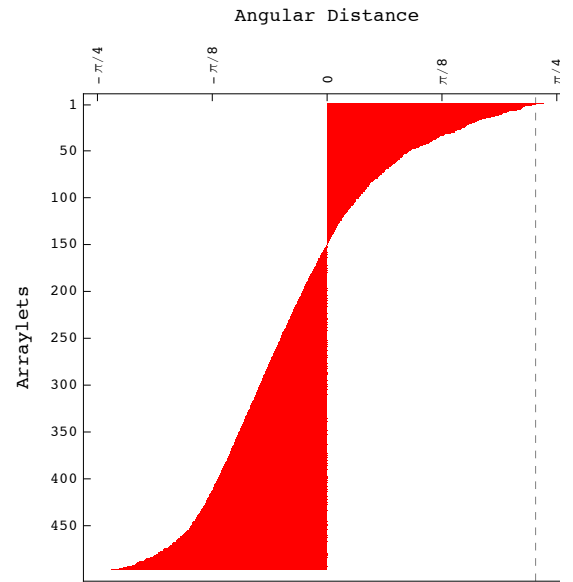

```
Export[path <> "Figure_1.pdf", fig1, "PDF", ImageSize -> 750];
```

```
(* Compute the 7p Tensor GSVD *)
```

```
(* Read the 7p Datasets *)
```

```
tumor1 = Import[path <> "D_Tumor_1_7p.txt", "Table"];  
tumor2 = Import[path <> "D_Tumor_2_7p.txt", "Table"];  
normal1 = Import[path <> "D_Normal_1_7p.txt", "Table"];  
normal2 = Import[path <> "D_Normal_2_7p.txt", "Table"];  
arrayNames = tumor1[[1, 5 ;;]];  
tumorProbeID = tumor1[[2 ;;, 1]];  
tumorProbeLoc = tumor1[[2 ;;, 2 ;; 4]];  
normalProbeID = normal1[[2 ;;, 1]];  
normalProbeLoc = normal1[[2 ;;, 2 ;; 4]];  
tumor1 = Drop[tumor1, 1, 4];  
tumor2 = Drop[tumor2, 1, 4];  
normal1 = Drop[normal1, 1, 4];  
normal2 = Drop[normal2, 1, 4];
```

```
(* Compute the 7p Tensor GSVD *)
```

```
{tumor1, tumor2, normal1, normal2, zTumorArraylets, zNormalArraylets, tumorCore,  
normalCore, xProbelets, yProbelets} = tGSVD[tumor1, tumor2, normal1, normal2];
```

```
(* Create Rasters of the 7p Tumor Datasets *)
```

```
labelsize = 12;  
yspace = 115;  
ticksize = 8;  
rastercontrast = 1;  
step = 5;
```

```
tumor1Raster = rasterFileGeneration[tumor1, rastercontrast];  
tumor2Raster = rasterFileGeneration[tumor2, rastercontrast];  
probes = Dimensions[tumor1Raster][[1]];
```

```
(* Input the 7p Chromosome Band Coordinates *)
```

```
arm = Transpose[Join[Transpose[tumorProbeLoc], {zTumorArraylets[[All, 1]]}]];
armBands = {{ "#chrom", "chromStart", "chromEnd", "name"}, {"chr7", 0, 2 800 000, "p22.3"},
  {"chr7", 2 800 000, 4 500 000, "p22.2"}, {"chr7", 4 500 000, 7 300 000, "p22.1"},
  {"chr7", 7 300 000, 13 800 000, "p21.3"}, {"chr7", 13 800 000, 16 500 000, "p21.2"},
  {"chr7", 16 500 000, 20 900 000, "p21.1"}, {"chr7", 20 900 000, 25 500 000, "p15.3"},
  {"chr7", 25 500 000, 28 000 000, "p15.2"}, {"chr7", 28 000 000, 28 800 000, "p15.1"},
  {"chr7", 28 800 000, 35 000 000, "p14.3"}, {"chr7", 35 000 000, 37 200 000, "p14.2"},
  {"chr7", 37 200 000, 43 300 000, "p14.1"}, {"chr7", 43 300 000, 45 400 000, "p13"},
  {"chr7", 45 400 000, 49 000 000, "p12.3"}, {"chr7", 49 000 000, 50 500 000, "p12.2"},
  {"chr7", 50 500 000, 54 000 000, "p12.1"}, {"chr7", 54 000 000, 58 000 000, "p11.2"}];
```

```
{bandLabels, patientLabels, xticks, yPosition, z} =
  figureVariables[armBands, arm, probes, "Tumor"];
```

```
(* Display the 7p Tumor Datasets *)
```

```
tumor1Raster = Graphics[Raster[tumor1Raster, {{0, -50}, {13, 25}}, ColorFunction -> RGBColor]];
tumor2Raster =
  Graphics[Raster[tumor2Raster, {{13, -37 + 13}, {26, 38 + 13}}, ColorFunction -> RGBColor]];
```

```
gTumorTensor = tensorDisplay[tumor1Raster,
  tumor2Raster, bandLabels, yPosition, xticks, patientLabels, "Tumor"];
```

```
(* Display the 7p Tumor Arraylets *)
```

```
space = 43.5;
rastercontrast = 50;
step = 5;
{rasterArraylets, bandLabelsArraylets, arrayletylbls, arrayletylblpos} =
  arrayletVariables[zTumorArraylets, bandLabels, "Tumor"];
```

```
gzTumorArraylets = arrayletsDisplay[rasterArraylets,
  bandLabelsArraylets, arrayletylbls, arrayletylblpos, xticks, yPosition, "Tumor"];
```

```
(* Display the 7p Tumor Core *)
```

```
rastercontrast = 0.01;
step = 1;
space = 82;
{coreRaster1, coreRaster2, corexlbls, corexlblpos, coreylbls, coreylblpos, xlist, ylist} =
  coreVariables[tumorCore, rastercontrast, "Tumor"];
```

```
gTumorCore = coreDisplay[coreRaster1, coreRaster2,
  corexlbls, corexlblpos, coreylbls, coreylblpos, xlist, ylist, "Tumor"];
```

```

(* Display the 7p x- and y-Probelets *)

rastercontrast = 30;
step = 1;
{rows, columns} = Dimensions[xProbelets];
probeletsRaster = rasterFileGeneration[
  xProbelets[[Join[Range[1, 5], Range[rows - 4, rows]], All]], rastercontrast];

rastercontrast = 1;
step = 1;
space = 117 - 10.75;
{yProbeletRaster, probeletlbl, probeletxlblpos, probeletxlbls} =
  probeletVariables[yProbelets, rastercontrast, patientLabels, "Tumor"];

gxTumorProbelets =
  xProbeletsDisplay[probeletsRaster, probeletlbl, probeletxlbls, probeletxlblpos, "Tumor"];

gyTumorProbelets = yProbeletsDisplay[yProbeletRaster, "Tumor"];
gTumorEqual = gEqualDisplay["Tumor"];

(* Create Rasters of the 7p Normal Datasets *)

rastercontrast = 1;
step = 5;

normal1Raster = rasterFileGeneration[normal1, rastercontrast];
normal2Raster = rasterFileGeneration[normal2, rastercontrast];
probes = Dimensions[normal1Raster][[1]];

(* Input the 7p Chromosome Band Coordinates *)

arm = Transpose[Join[Transpose[normalProbeLoc], {zNormalArraylets[[All, 1]]}]];

{bandLabels, patientLabels, xticks, yPosition, z} =
  figureVariables[armBands, arm, probes, "Normal"];

(* Display the 7p Normal Datasets *)

normal1Raster = Graphics[
  Raster[normal1Raster, {{0, -65 - yspace}, {13, 25 - yspace}}, ColorFunction -> RGBColor]];
normal2Raster = Graphics[Raster[normal2Raster,
  {{13, -52 + 13 - yspace}, {26, 38 + 13 - yspace}}, ColorFunction -> RGBColor]];

gNormalTensor = tensorDisplay[normal1Raster,
  normal2Raster, bandLabels, yPosition, xticks, patientLabels, "Normal"];

```

```

(* Display the 7p Normal Arraylets *)

space = 43.5;
rastercontrast = 50;
step = 5;
{rasterArraylets, bandLabelsArraylets, arrayletylbls, arrayletylblpos} =
  arrayletVariables[zNormalArraylets, bandLabels, "Normal"];

gzNormalArraylets = arrayletsDisplay[rasterArraylets,
  bandLabelsArraylets, arrayletylbls, arrayletylblpos, xticks, yPosition, "Normal"];

(* Display the 7p Normal Core *)

rastercontrast = 0.01;
step = 1;
space = 82;
{coreRaster1, coreRaster2, corexlbls, corexlblpos, coreylbls, coreylblpos, xlist, ylist} =
  coreVariables[normalCore, rastercontrast, "Normal"];

gNormalCore = coreDisplay[coreRaster1, coreRaster2,
  corexlbls, corexlblpos, coreylbls, coreylblpos, xlist, ylist, "Normal"];

(* Display the 7p x- and y-Probelets *)

rastercontrast = 30;
step = 1;
{rows, columns} = Dimensions[xProbelets];
probeletsRaster = rasterFileGeneration[
  xProbelets[[Join[Range[1, 5], Range[rows - 4, rows]], All]], rastercontrast];

rastercontrast = 1;
step = 1;
space = 117 - 10.75;
{yProbeletRaster, probeletlbl, probeletxlblpos, probeletxlbls} =
  probeletVariables[yProbelets, rastercontrast, patientLabels, "Normal"];

gxNormalProbelets =
  xProbeletsDisplay[probeletsRaster, probeletlbl, probeletxlbls, probeletxlblpos, "Normal"];

gyNormalProbelets = yProbeletsDisplay[yProbeletRaster, "Normal"];
gNormalEqual = gEqualDisplay["Normal"];

(* Display the 7p Angular Distances Bar Chart *)

barsInset = angularDistance[tumorCore, normalCore];

(* Display the 7p Tensor GSVD *)

figA = Show[{gTumorTensor, gTumorEqual, gzTumorArraylets,
  gTumorCore, gxTumorProbelets, gyTumorProbelets, gNormalTensor, gNormalEqual,
  gzNormalArraylets, gNormalCore, gxNormalProbelets, gyNormalProbelets, barsInset},
  PlotRange → All, ImageSize → 750, AspectRatio → Automatic]

```

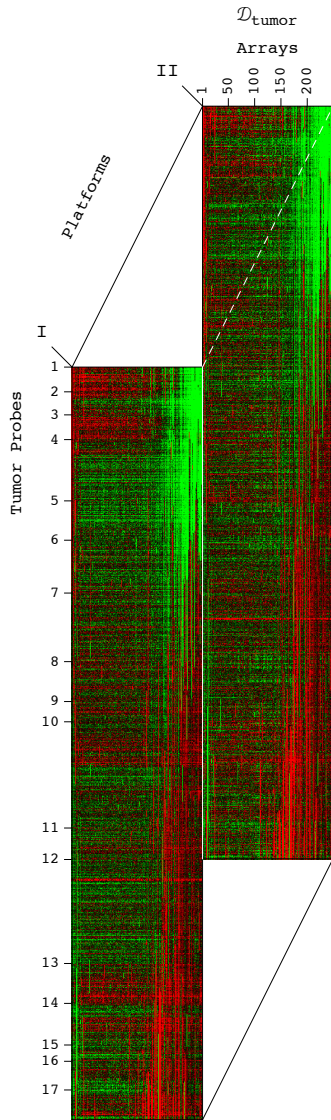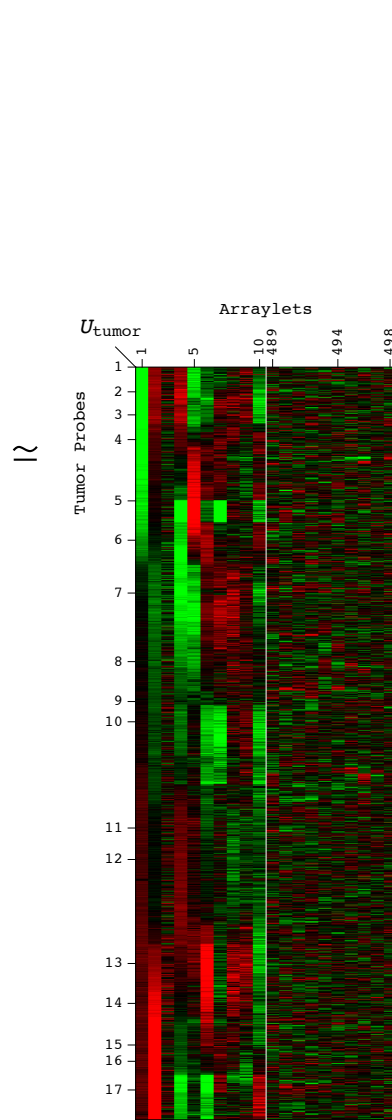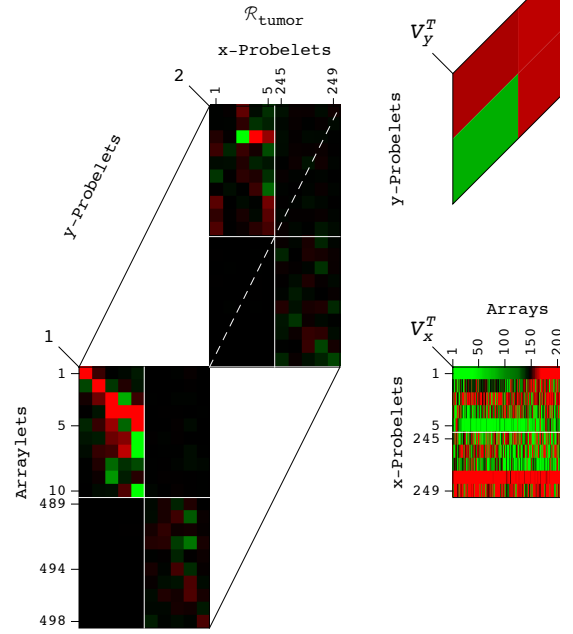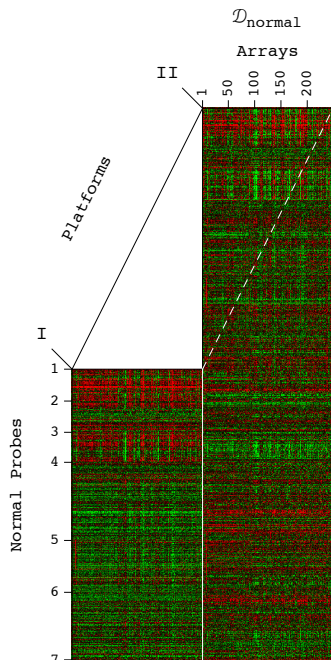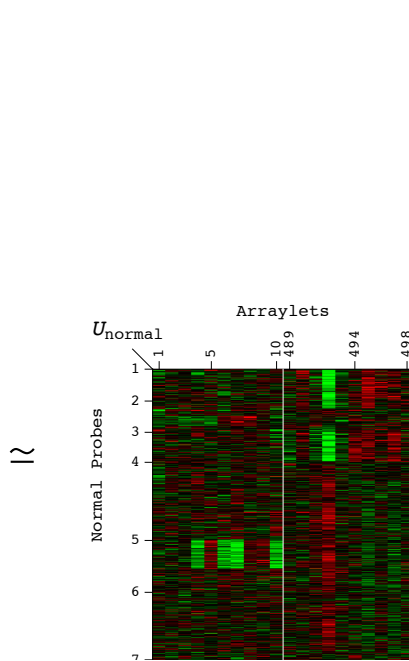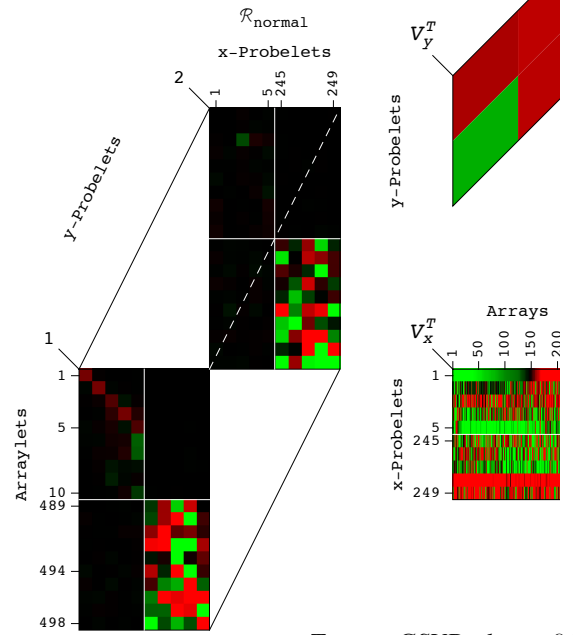



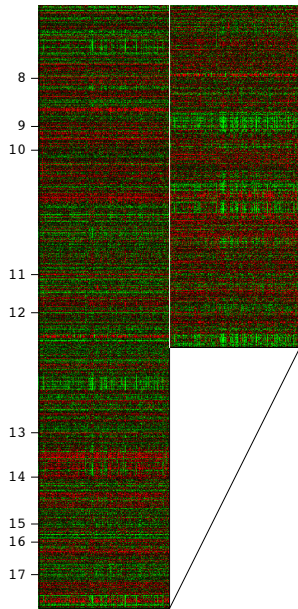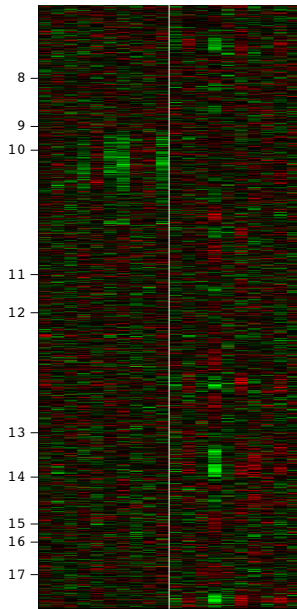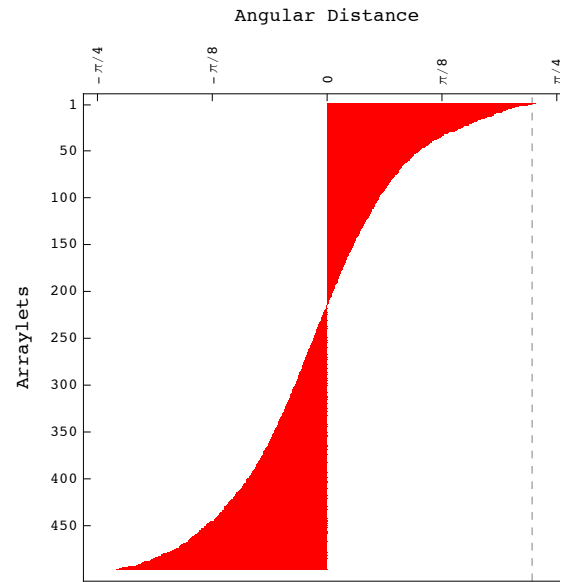

```
Export[path <> "Figure_A.pdf", figA, "PDF", ImageSize -> 750];
```

```
(* Compute Xq Tensor GSVD *)
```

```
(* Read Xq Datasets *)
```

```
tumor1 = Import[path <> "D_Tumor_1_Xq.txt", "Table"];  
tumor2 = Import[path <> "D_Tumor_2_Xq.txt", "Table"];  
normal1 = Import[path <> "D_Normal_1_Xq.txt", "Table"];  
normal2 = Import[path <> "D_Normal_2_Xq.txt", "Table"];  
arrayNames = tumor1[[1, 5 ;;]];  
tumorProbeID = tumor1[[2 ;;, 1]];  
tumorProbeLoc = tumor1[[2 ;;, 2 ;; 4]];  
normalProbeID = normal1[[2 ;;, 1]];  
normalProbeLoc = normal1[[2 ;;, 2 ;; 4]];  
tumor1 = Drop[tumor1, 1, 4];  
tumor2 = Drop[tumor2, 1, 4];  
normal1 = Drop[normal1, 1, 4];  
normal2 = Drop[normal2, 1, 4];
```

```
(* Compute the Xq Tensor GSVD *)
```

```
{tumor1, tumor2, normal1, normal2, zTumorArraylets, zNormalArraylets, tumorCore,  
normalCore, xProbelets, yProbelets} = tGSVD[tumor1, tumor2, normal1, normal2];
```

```
(* Create Rasters of the Xq Tumor Datasets *)
```

```
labelsize = 12;  
yspace = 115;  
ticksize = 8;  
rastercontrast = 1;  
step = 5;
```

```
tumor1Raster = rasterFileGeneration[tumor1, rastercontrast];  
tumor2Raster = rasterFileGeneration[tumor2, rastercontrast];  
probes = Dimensions[tumor1Raster][[1]];
```

```
(* Input the Xq Chromosome Band Coordinates *)
```

```
arm = Transpose[Join[Transpose[tumorProbeLoc], {zTumorArraylets[[All, 1]]}]];
armBands = {{"#chrom", "chromStart", "chromEnd", "name"},
  {"chrX", 60 600 000, 63 000 000, "q11.1"}, {"chrX", 63 000 000, 64 600 000, "q11.2"},
  {"chrX", 64 600 000, 67 800 000, "q12"}, {"chrX", 67 800 000, 71 800 000, "q13.1"},
  {"chrX", 71 800 000, 73 900 000, "q13.2"}, {"chrX", 73 900 000, 76 000 000, "q13.3"},
  {"chrX", 76 000 000, 84 600 000, "q21.1"}, {"chrX", 84 600 000, 86 200 000, "q21.2"},
  {"chrX", 86 200 000, 91 800 000, "q21.31"}, {"chrX", 91 800 000, 93 500 000, "q21.32"},
  {"chrX", 93 500 000, 98 300 000, "q21.33"}, {"chrX", 98 300 000, 102 600 000, "q22.1"},
  {"chrX", 102 600 000, 103 700 000, "q22.2"}, {"chrX", 103 700 000, 108 700 000, "q22.3"},
  {"chrX", 108 700 000, 116 500 000, "q23"}, {"chrX", 116 500 000, 120 900 000, "q24"},
  {"chrX", 120 900 000, 128 700 000, "q25"}, {"chrX", 128 700 000, 130 400 000, "q26.1"},
  {"chrX", 130 400 000, 133 600 000, "q26.2"}, {"chrX", 133 600 000, 138 000 000, "q26.3"},
  {"chrX", 138 000 000, 140 300 000, "q27.1"}, {"chrX", 140 300 000, 142 100 000, "q27.2"},
  {"chrX", 142 100 000, 147 100 000, "q27.3"}, {"chrX", 147 100 000, 155 270 560, "q28"}];
```

```
{bandLabels, patientLabels, xticks, yPosition, z} =
  figureVariables[armBands, arm, probes, "Tumor"];
```

```
Map[(bandLabels[[#[[1]]]] =
  Text[Style[ToString[#[[1]], FontFamily -> "Courier", FontSize -> ticksize],
    {-1.25, #[[2]], {1, 0}}] & , {{1, 25.4}, {2, 24.3}, {3, 23.05},
    {10, z[[10]] + 0.1}, {11, z[[11]] - 0.95}, {22, z[[22]] + 0.2}, {23, z[[23]] - 0.2}}];
```

```
(* Display the Xq Tumor Datasets *)
```

```
tumor1Raster = Graphics[Raster[tumor1Raster, {{0, -50}, {13, 25}}, ColorFunction -> RGBColor]];
tumor2Raster =
  Graphics[Raster[tumor2Raster, {{13, -37 + 13}, {26, 38 + 13}}, ColorFunction -> RGBColor]];
```

```
gTumorTensor = tensorDisplay[tumor1Raster,
  tumor2Raster, bandLabels, yPosition, xticks, patientLabels, "Tumor"];
```

```
(* Display the Xq Tumor Arraylets *)
```

```
space = 43.5;
rastercontrast = 50;
step = 5;
{rasterArraylets, bandLabelsArraylets, arrayletylbls, arrayletylblpos} =
  arrayletVariables[zTumorArraylets, bandLabels, "Tumor"];
```

```
gzTumorArraylets = arrayletsDisplay[rasterArraylets,
  bandLabelsArraylets, arrayletylbls, arrayletylblpos, xticks, yPosition, "Tumor"];
```

```
(* Display the Xq Tumor Core *)
```

```
rastercontrast = 0.01;
step = 1;
space = 82;
{coreRaster1, coreRaster2, corexlbls, corexlblpos, coreylbls, coreylblpos, xlist, ylist} =
  coreVariables[tumorCore, rastercontrast, "Tumor"];
```

```
gTumorCore = coreDisplay[coreRaster1, coreRaster2,
  corexlbls, corexlblpos, coreylbls, coreylblpos, xlist, ylist, "Tumor"];
```

```

(* Display the Xq x- and y-Probelets *)

rastercontrast = 30;
step = 1;
{rows, columns} = Dimensions[xProbelets];
probeletsRaster = rasterFileGeneration[
  xProbelets[[Join[Range[1, 5], Range[rows - 4, rows]], All]], rastercontrast];

rastercontrast = 1;
step = 1;
space = 117 - 10.75;
{yProbeletRaster, probeletlbl, probeletxlblpos, probeletxlbls} =
  probeletVariables[yProbelets, rastercontrast, patientLabels, "Tumor"];

gxTumorProbelets =
  xProbeletsDisplay[probeletsRaster, probeletlbl, probeletxlbls, probeletxlblpos, "Tumor"];

gyTumorProbelets = yProbeletsDisplay[yProbeletRaster, "Tumor"];
gTumorEqual = gEqualDisplay["Tumor"];

(* Create Rasters of the Xq Normal Datasets *)

rastercontrast = 1;
step = 5;

normal1Raster = rasterFileGeneration[normal1, rastercontrast];
normal2Raster = rasterFileGeneration[normal2, rastercontrast];
probes = Dimensions[normal1Raster][[1]];

(* Input the Xq Chromosome Band Coordinates *)

arm = Transpose[Join[Transpose[normalProbeLoc], {zNormalArraylets[[All, 1]]}]];

{bandLabels, patientLabels, xticks, yPosition, z} =
  figureVariables[armBands, arm, probes, "Normal"];

Map[(bandLabels[[#[[1]]]] = Text[Style[ToString[#[[1]]],
  FontFamily -> "Courier", FontSize -> ticksize], {-1.25, #[[2]], {1, 0}}]; &,
  {{1, 25 - yspace + 0.5}, {2, 25 - yspace - 0.5}, {3, 25 - yspace - 1.95}, {10, z[[10]] + 0.1},
  {11, z[[11]] - 0.95}, {22, z[[22]] + 0.3}, {23, z[[23]] - 0.2}}];

(* Display the Xq Normal Datasets *)

normal1Raster = Graphics[
  Raster[normal1Raster, {{0, -65 - yspace}, {13, 25 - yspace}}, ColorFunction -> RGBColor]];
normal2Raster = Graphics[Raster[normal2Raster,
  {{13, -52 + 13 - yspace}, {26, 38 + 13 - yspace}}, ColorFunction -> RGBColor]];

(* Display the Xq Normal Arraylets *)

gNormalTensor = tensorDisplay[normal1Raster,
  normal2Raster, bandLabels, yPosition, xticks, patientLabels, "Normal"];

space = 43.5;
rastercontrast = 50;
step = 5;
{rasterArraylets, bandLabelsArraylets, arrayletylbls, arrayletylblpos} =
  arrayletVariables[zNormalArraylets, bandLabels, "Normal"];

gzNormalArraylets = arrayletsDisplay[rasterArraylets,
  bandLabelsArraylets, arrayletylbls, arrayletylblpos, xticks, yPosition, "Normal"];

```

```

(* Display the Xq Normal Core *)

rastercontrast = 0.01;
step = 1;
space = 82;
{coreRaster1, coreRaster2, corexlbls, corexlblpos, coreybls, coreyblpos, xlist, ylist} =
  coreVariables[normalCore, rastercontrast, "Normal"];

gNormalCore = coreDisplay[coreRaster1, coreRaster2,
  corexlbls, corexlblpos, coreybls, coreyblpos, xlist, ylist, "Normal"];

(* Display the Xq x- and y-Probelets *)

rastercontrast = 30;
step = 1;
{rows, columns} = Dimensions[xProbelets];
probeletsRaster = rasterFileGeneration[
  xProbelets[[Join[Range[1, 5], Range[rows - 4, rows]], All]], rastercontrast];

rastercontrast = 1;
step = 1;
space = 117 - 10.75;
{yProbeletRaster, probeletlbl, probeletxlblpos, probeletxlbls} =
  probeletVariables[yProbelets, rastercontrast, patientLabels, "Normal"];

gxNormalProbelets =
  xProbeletsDisplay[probeletsRaster, probeletlbl, probeletxlbls, probeletxlblpos, "Normal"];

gyNormalProbelets = yProbeletsDisplay[yProbeletRaster, "Normal"];
gNormalEqual = gEqualDisplay["Normal"];

(* Display the Xq Angular Distances Bar Chart *)

barsInset = angularDistance[tumorCore, normalCore];

(* Display the Xq Tensor GSVD *)

figB = Show[{gTumorTensor, gTumorEqual, gzTumorArraylets,
  gTumorCore, gxTumorProbelets, gyTumorProbelets, gNormalTensor, gNormalEqual,
  gzNormalArraylets, gNormalCore, gxNormalProbelets, gyNormalProbelets, barsInset},
  PlotRange → All, ImageSize → 750, AspectRatio → Automatic]

```

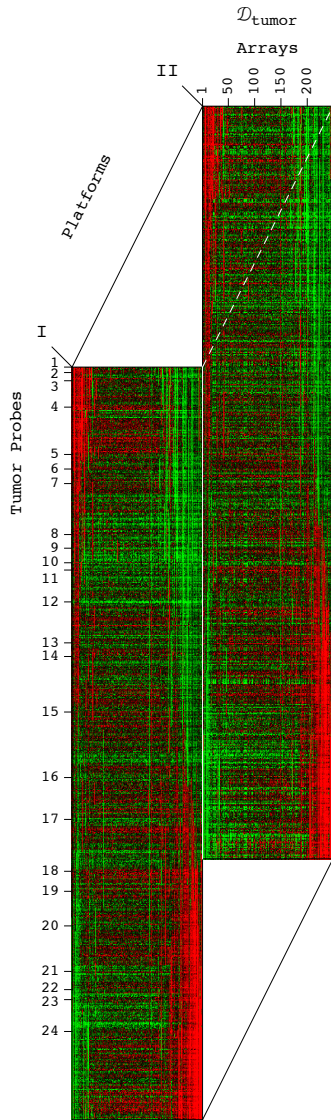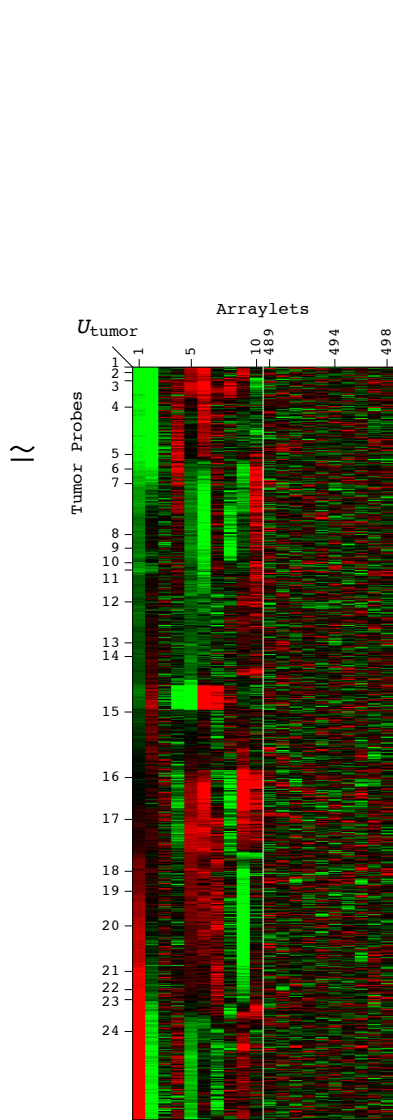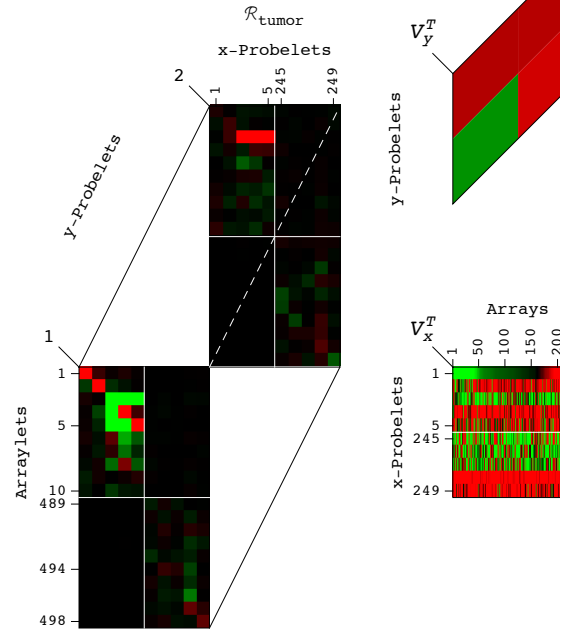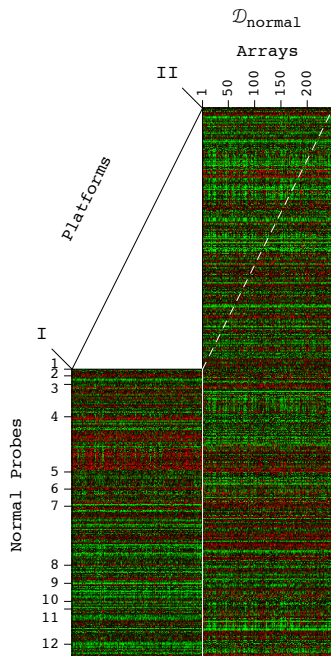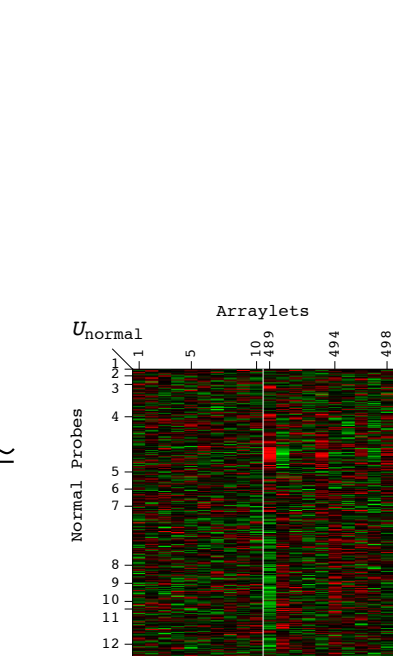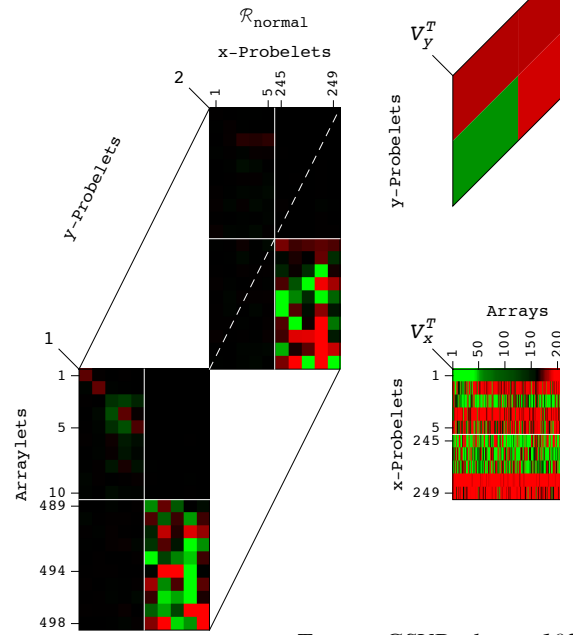

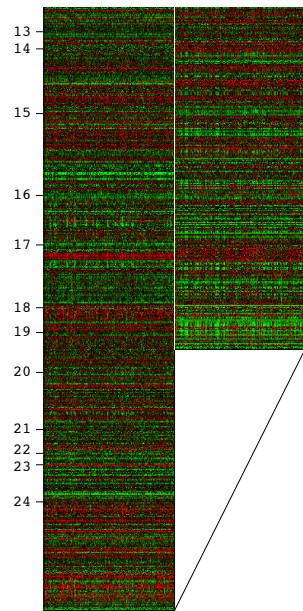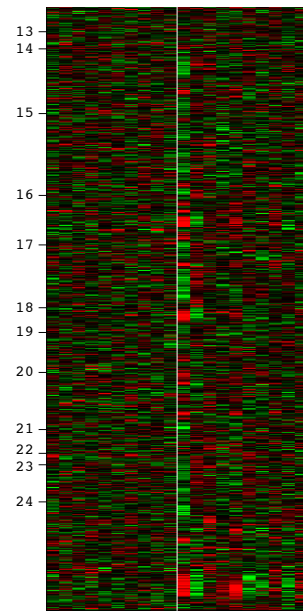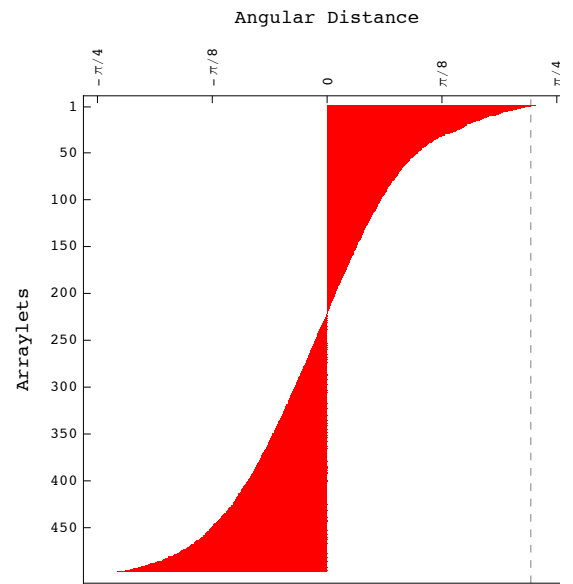

```
Export[path <> "Figure_B.pdf", figB, "PDF", ImageSize -> 750];
```
